# Supplementary material for: Self-Reported Sleep Disturbance from Road, Rail and Aircraft Noise: Exposure-Response Relationships and Effect Modifiers in the SiRENE Study
Source: MDPI journal article supplement (doi:10.3390/ijerph16214186), 2019-10-29
Supplement: s1 [file s1]

# Supplementary File 1

## A) Supplementary Tables

Supplementary Table S1

Coefficients of binary logistic regression models on the probability to be highly sleep disturbed ( $P_{HSD}$ ), investigating effect modification by stratified categories of IRNight, bedroom window position, bedroom orientation towards street, noise level difference between bedroom façade exposure and loudest (all sources) façade point of the dwelling, degree of urbanization, sleep timing and sleep period duration, sleep medication intake, and season and temperature. "cat." refers to "categories". Significant p-values are highlighted in bold.

| Figure #<br>in article | Noise<br>source | Effect<br>modification<br>factor in focus | Effect                            | B       | SE of B | Odds<br>Ratio | p-Value         |
|------------------------|-----------------|-------------------------------------------|-----------------------------------|---------|---------|---------------|-----------------|
| 4 left                 | Road traffic    | IRNight <sup>a</sup>                      | Intercept                         | -7.5790 | 0.4414  | 0.0005        | <b>&lt;0.01</b> |
|                        |                 |                                           | LNight [dB(A)]                    | 0.1032  | 0.0070  | 1.1087        | <b>&lt;0.01</b> |
|                        |                 |                                           | Male Sex [vs. female]             | -0.0811 | 0.0998  | 0.9221        | 0.42            |
|                        |                 |                                           | Age [years]                       | 0.0036  | 0.0034  | 1.0036        | 0.28            |
|                        |                 |                                           | German [vs. FR/IT]                | -0.2635 | 0.1007  | 0.7683        | <b>&lt;0.01</b> |
|                        |                 |                                           | Postal mode [vs. online]          | 0.0115  | 0.1232  | 1.0116        | 0.93            |
|                        |                 |                                           | IRNight cat. (linear)             | -1.5948 | 0.6885  | 0.2030        | <b>0.02</b>     |
|                        |                 |                                           | IRNight cat. (quadratic)          | -0.2987 | 0.6380  | 0.7418        | 0.64            |
|                        |                 |                                           | LNight x IRNight cat. (linear)    | 0.0285  | 0.0126  | 1.0289        | <b>0.02</b>     |
|                        |                 |                                           | LNight x IRNight cat. (quadratic) | 0.0039  | 0.0117  | 1.0039        | 0.74            |
| 4 center               | Railways        | IRNight <sup>a</sup>                      | Intercept                         | -8.0567 | 0.5094  | 0.0003        | <b>&lt;0.01</b> |
|                        |                 |                                           | LNight [dB(A)]                    | 0.1092  | 0.0083  | 1.1154        | <b>&lt;0.01</b> |
|                        |                 |                                           | Male Sex [vs. female]             | 0.0200  | 0.1259  | 1.0202        | 0.87            |
|                        |                 |                                           | Age [years]                       | 0.0011  | 0.0042  | 1.0011        | 0.80            |
|                        |                 |                                           | German [vs. FR/IT]                | -0.0170 | 0.1346  | 0.9831        | 0.90            |
|                        |                 |                                           | Postal mode [vs. online]          | 0.5071  | 0.1674  | 1.6605        | <b>&lt;0.01</b> |
|                        |                 |                                           | IRNight cat. (linear)             | 0.9554  | 0.6407  | 2.5997        | 0.14            |
|                        |                 |                                           | IRNight cat. (quadratic)          | 0.3300  | 0.8347  | 1.3910        | 0.69            |
|                        |                 |                                           | LNight x IRNight cat. (linear)    | -0.0147 | 0.0129  | 0.9855        | 0.25            |
|                        |                 |                                           | LNight x IRNight cat. (quadratic) | -0.0049 | 0.0158  | 0.9951        | 0.76            |
| 4 right                | Aircraft        | IRNight <sup>a</sup>                      | Intercept                         | -6.5912 | 0.4731  | 0.0014        | <b>&lt;0.01</b> |
|                        |                 |                                           | LNight [dB(A)]                    | 0.0971  | 0.0084  | 1.1020        | <b>&lt;0.01</b> |
|                        |                 |                                           | Male Sex [vs. female]             | 0.0615  | 0.1258  | 1.0634        | 0.62            |
|                        |                 |                                           | Age [years]                       | 0.0145  | 0.0043  | 1.0146        | <b>&lt;0.01</b> |
|                        |                 |                                           | German [vs. FR/IT]                | -0.0760 | 0.1336  | 0.9268        | 0.57            |
|                        |                 |                                           | Postal mode [vs. online]          | 0.2228  | 0.1602  | 1.2495        | 0.16            |
|                        |                 |                                           | IRNight cat. (linear)             | 2.1312  | 0.5827  | 8.4252        | <b>&lt;0.01</b> |
|                        |                 |                                           | IRNight cat. (quadratic)          | -1.7540 | 0.6524  | 0.1731        | <b>&lt;0.01</b> |
|                        |                 |                                           | LNight x IRNight cat. (linear)    | -0.0389 | 0.0135  | 0.9618        | <b>&lt;0.01</b> |
|                        |                 |                                           | LNight x IRNight cat. (quadratic) | 0.0382  | 0.0150  | 1.0390        | <b>0.01</b>     |
| 5 left                 | Road traffic    | Window position <sup>b</sup>              | Intercept                         | -7.1144 | 0.4828  | 0.0008        | <b>&lt;0.01</b> |
|                        |                 |                                           | LNight [dB(A)]                    | 0.0950  | 0.0080  | 1.0996        | <b>&lt;0.01</b> |
|                        |                 |                                           | Male Sex [vs. female]             | -0.0977 | 0.1010  | 0.9069        | 0.33            |
|                        |                 |                                           | Age [years]                       | 0.0037  | 0.0034  | 1.0038        | 0.27            |
|                        |                 |                                           | German [vs. FR/IT]                | -0.2690 | 0.1014  | 0.7642        | <b>&lt;0.01</b> |

| Figure #<br>in article | Noise<br>source | Effect<br>modification<br>factor in focus | Effect                                    | B       | SE of B | Odds<br>Ratio | p-Value         |
|------------------------|-----------------|-------------------------------------------|-------------------------------------------|---------|---------|---------------|-----------------|
| 5 middle               | Railways        | Window position <sup>b</sup>              | Postal mode [vs. online]                  | 0.0115  | 0.1243  | 1.0116        | 0.93            |
|                        |                 |                                           | Window pos. (linear)                      | 0.8717  | 0.8315  | 2.3909        | 0.29            |
|                        |                 |                                           | Window pos. (quadratic)                   | -0.6363 | 0.6351  | 0.5292        | 0.32            |
|                        |                 |                                           | LNight x Window pos. (linear)             | -0.0155 | 0.0156  | 0.9846        | 0.32            |
|                        |                 |                                           | LNight x Window pos. (quadr.)             | 0.0138  | 0.0119  | 1.0139        | 0.25            |
|                        |                 |                                           | Intercept                                 | -8.3206 | 0.5018  | 0.0002        | <b>&lt;0.01</b> |
|                        |                 |                                           | LNight [dB(A)]                            | 0.1122  | 0.0076  | 1.1187        | <b>&lt;0.01</b> |
|                        |                 |                                           | Male Sex [vs. female]                     | -0.0165 | 0.1272  | 0.9836        | 0.90            |
|                        |                 |                                           | Age [years]                               | 0.0029  | 0.0043  | 1.0029        | 0.50            |
|                        |                 |                                           | German [vs. FR/IT]                        | -0.0049 | 0.1353  | 0.9951        | 0.97            |
|                        |                 |                                           | Postal mode [vs. online]                  | 0.5572  | 0.1695  | 1.7458        | <b>&lt;0.01</b> |
|                        |                 |                                           | Window pos. (linear)                      | -0.1278 | 0.7952  | 0.8800        | 0.87            |
|                        |                 |                                           | Window pos. (quadratic)                   | 0.6444  | 0.6529  | 1.9048        | 0.32            |
|                        |                 |                                           | LNight x Window pos. (linear)             | 0.0009  | 0.0145  | 1.0009        | 0.95            |
|                        |                 |                                           | LNight x Window pos. (quadr.)             | -0.0066 | 0.0118  | 0.9935        | 0.58            |
| 5 right                | Aircraft        | Window position <sup>b</sup>              | Intercept                                 | -7.7066 | 0.4833  | 0.0004        | <b>&lt;0.01</b> |
|                        |                 |                                           | LNight [dB(A)]                            | 0.1223  | 0.0087  | 1.1301        | <b>&lt;0.01</b> |
|                        |                 |                                           | Male Sex [vs. female]                     | 0.0422  | 0.1276  | 1.0431        | 0.74            |
|                        |                 |                                           | Age [years]                               | 0.0153  | 0.0044  | 1.0154        | <b>&lt;0.01</b> |
|                        |                 |                                           | German [vs. FR/IT]                        | -0.0565 | 0.1338  | 0.9451        | 0.67            |
|                        |                 |                                           | Postal mode [vs. online]                  | 0.2113  | 0.1618  | 1.2352        | 0.19            |
|                        |                 |                                           | Window pos. (linear)                      | -0.0569 | 0.7238  | 0.9446        | 0.94            |
|                        |                 |                                           | Window pos. (quadratic)                   | 0.1055  | 0.5617  | 1.1112        | 0.85            |
|                        |                 |                                           | LNight x Window pos. (linear)             | 0.0072  | 0.0167  | 1.0072        | 0.67            |
|                        |                 |                                           | Intercept                                 | -7.3400 | 0.5127  | 0.0006        | <b>&lt;0.01</b> |
|                        |                 |                                           | LNight [dB(A)]                            | 0.0927  | 0.0087  | 1.0972        | <b>&lt;0.01</b> |
|                        |                 |                                           | Male Sex [vs. female]                     | -0.0697 | 0.1013  | 0.9327        | 0.49            |
|                        |                 |                                           | Age [years]                               | 0.0038  | 0.0034  | 1.0039        | 0.26            |
|                        |                 |                                           | German [vs. FR/IT]                        | -0.1818 | 0.1024  | 0.8338        | 0.08            |
|                        |                 |                                           | Postal mode [vs. online]                  | -0.0064 | 0.1250  | 0.9936        | 0.96            |
| 6 (middle)             | Road traffic    | Level difference <sup>c</sup>             | D_quietside cat. (linear)                 | -0.3152 | 0.8607  | 0.7297        | 0.71            |
|                        |                 |                                           | D_quietside cat. (quadratic)              | 1.1853  | 0.9208  | 3.2716        | 0.20            |
|                        |                 |                                           | D_quietside. cat. (cubic)                 | -0.0169 | 0.9776  | 0.9833        | 0.99            |
|                        |                 |                                           | LNight x D_quietside cat. (linear)        | -0.0112 | 0.0161  | 0.9889        | 0.49            |
|                        |                 |                                           | LNight x D_quietside. cat. (quad.)        | -0.0169 | 0.0174  | 0.9832        | 0.33            |
|                        |                 |                                           | LNight x D_quietside cat. (cubic)         | -0.0031 | 0.0186  | 0.9969        | 0.87            |
|                        |                 |                                           | Intercept                                 | -8.2906 | 0.7884  | 0.0003        | <b>&lt;0.01</b> |
|                        |                 |                                           | LNight [dB(A)]                            | 0.0966  | 0.0140  | 1.1014        | <b>&lt;0.01</b> |
|                        |                 |                                           | Male Sex [vs. female]                     | -0.1058 | 0.1026  | 0.8996        | 0.30            |
|                        |                 |                                           | Age [years]                               | 0.0033  | 0.0034  | 1.0033        | 0.34            |
|                        |                 |                                           | German [vs. FR/IT]                        | -0.2070 | 0.1033  | 0.8130        | <b>0.04</b>     |
|                        |                 |                                           | Postal mode [vs. online]                  | -0.0246 | 0.1266  | 0.9757        | 0.85            |
|                        |                 |                                           | Bedroom orientation [degree] <sup>c</sup> | 0.0125  | 0.0055  | 1.0126        | <b>0.02</b>     |
|                        |                 |                                           | LNight x Bedroom orientation              | 0.0000  | 0.0001  | 1.0000        | 0.65            |
|                        |                 |                                           | Intercept                                 | -7.5160 | 0.5720  | 0.0005        | <b>&lt;0.01</b> |
| 7 left                 | Road traffic    | DEGURBA <sup>e</sup>                      | LNight [dB(A)]                            | 0.1008  | 0.0101  | 1.1060        | <b>&lt;0.01</b> |
|                        |                 |                                           | Male Sex [vs. female]                     | -0.0841 | 0.1001  | 0.9193        | 0.40            |
|                        |                 |                                           | Age [years]                               | 0.0037  | 0.0034  | 1.0037        | 0.27            |
|                        |                 |                                           | German [vs. FR/IT]                        | -0.2723 | 0.1011  | 0.7616        | 0.01            |
|                        |                 |                                           | Postal mode [vs. online]                  | 0.0120  | 0.1234  | 1.0121        | 0.92            |
|                        |                 |                                           | DEGURBA. (linear)                         | -1.3455 | 1.0579  | 0.2604        | 0.20            |
|                        |                 |                                           | DEGURBA (quadratic)                       | 0.7305  | 0.7614  | 2.0761        | 0.34            |
|                        |                 |                                           | LNight x DEGURBA (linear)                 | 0.0191  | 0.0201  | 1.0193        | 0.34            |
|                        |                 |                                           | LNight x DEGURBA (quadr.)                 | -0.0172 | 0.0144  | 0.9830        | 0.23            |

| Figure #<br>in article | Noise<br>source | Effect<br>modification<br>factor in focus | Effect                            | B       | SE of B | Odds<br>Ratio | p-Value         |
|------------------------|-----------------|-------------------------------------------|-----------------------------------|---------|---------|---------------|-----------------|
| 7 middle               | Railways        | DEGURBA <sup>e</sup>                      | Intercept                         | -8.3433 | 0.5745  | 0.0002        | <b>&lt;0.01</b> |
|                        |                 |                                           | LNight [dB(A)]                    | 0.1131  | 0.0091  | 1.1198        | <b>&lt;0.01</b> |
|                        |                 |                                           | Male Sex [vs. female]             | 0.0230  | 0.1265  | 1.0232        | 0.86            |
|                        |                 |                                           | Age [years]                       | 0.0017  | 0.0042  | 1.0017        | 0.68            |
|                        |                 |                                           | German [vs. FR/IT]                | -0.0200 | 0.1381  | 0.9802        | 0.89            |
|                        |                 |                                           | Postal mode [vs. online]          | 0.5109  | 0.1681  | 1.6667        | <b>&lt;0.01</b> |
|                        |                 |                                           | DEGURBA (linear)                  | -0.3835 | 1.0116  | 0.6815        | 0.70            |
|                        |                 |                                           | DEGURBA (quadratic)               | 0.0635  | 0.7123  | 1.0656        | 0.93            |
|                        |                 |                                           | LNight x DEGURBA (linear)         | 0.0041  | 0.0183  | 1.0041        | 0.82            |
|                        |                 |                                           | LNight x DEGURBA (quadr.)         | -0.0022 | 0.0128  | 0.9978        | 0.86            |
|                        |                 |                                           |                                   |         |         |               |                 |
| 7 right                | Aircraft        | DEGURBA <sup>e</sup>                      | Intercept                         | -8.3845 | 0.6460  | 0.0002        | <b>&lt;0.01</b> |
|                        |                 |                                           | LNight [dB(A)]                    | 0.1450  | 0.0141  | 1.1560        | <b>&lt;0.01</b> |
|                        |                 |                                           | Male Sex [vs. female]             | 0.0575  | 0.1279  | 1.0591        | 0.65            |
|                        |                 |                                           | Age [years]                       | 0.0157  | 0.0043  | 1.0158        | <b>&lt;0.01</b> |
|                        |                 |                                           | German [vs. FR/IT]                | -0.0579 | 0.1389  | 0.9437        | 0.68            |
|                        |                 |                                           | Postal mode [vs. online]          | 0.1936  | 0.1618  | 1.2136        | 0.23            |
|                        |                 |                                           | DEGURBA (linear)                  | -0.7696 | 1.1538  | 0.4632        | 0.50            |
|                        |                 |                                           | DEGURBA (quadratic)               | -0.5207 | 0.7902  | 0.5941        | 0.51            |
|                        |                 |                                           | LNight x DEGURBA (linear)         | 0.0402  | 0.0284  | 1.0410        | 0.16            |
|                        |                 |                                           | LNight x DEGURBA (quadr.)         | 0.0129  | 0.0192  | 1.0130        | 0.50            |
|                        |                 |                                           |                                   |         |         |               |                 |
| 8 left                 | Road traffic    | Sleep timing <sup>f</sup>                 | Intercept                         | -7.2930 | 0.4298  | 0.0007        | <b>&lt;0.01</b> |
|                        |                 |                                           | LNight [dB(A)]                    | 0.1000  | 0.0068  | 1.1052        | <b>&lt;0.01</b> |
|                        |                 |                                           | Male Sex [vs. female]             | -0.0518 | 0.1039  | 0.9495        | 0.62            |
|                        |                 |                                           | Age [years]                       | 0.0019  | 0.0035  | 1.0019        | 0.59            |
|                        |                 |                                           | German [vs. FR/IT]                | -0.2750 | 0.1039  | 0.7595        | <b>&lt;0.01</b> |
|                        |                 |                                           | Postal mode [vs. online]          | -0.0483 | 0.1249  | 0.9528        | 0.70            |
|                        |                 |                                           | Sleep timing cat. (linear)        | 0.4240  | 0.6293  | 1.5281        | 0.50            |
|                        |                 |                                           | Sleep timing cat. (quadratic)     | 0.5057  | 0.6473  | 1.6581        | 0.43            |
|                        |                 |                                           | LNight x Sleep timing cat. (lin.) | -0.0132 | 0.0116  | 0.9869        | 0.25            |
|                        |                 |                                           | LNight x Sleep timing cat. (q.)   | -0.0101 | 0.0119  | 0.9899        | 0.40            |
|                        |                 |                                           |                                   |         |         |               |                 |
| 8 middle               | Railways        | Sleep timing <sup>f</sup>                 | Intercept                         | -8.1787 | 0.4534  | 0.0003        | <b>&lt;0.01</b> |
|                        |                 |                                           | LNight [dB(A)]                    | 0.1127  | 0.0064  | 1.1193        | <b>&lt;0.01</b> |
|                        |                 |                                           | Male Sex [vs. female]             | -0.0411 | 0.1312  | 0.9598        | 0.75            |
|                        |                 |                                           | Age [years]                       | 0.0002  | 0.0044  | 1.0002        | 0.96            |
|                        |                 |                                           | German [vs. FR/IT]                | 0.0004  | 0.1385  | 1.0004        | 1.00            |
|                        |                 |                                           | Postal mode [vs. online]          | 0.4898  | 0.1690  | 1.6320        | <b>&lt;0.01</b> |
|                        |                 |                                           | Sleep timing cat. (linear)        | -0.4608 | 0.6350  | 0.6308        | 0.47            |
|                        |                 |                                           | Sleep timing cat. (quadratic)     | -0.5587 | 0.5992  | 0.5720        | 0.35            |
|                        |                 |                                           | LNight x Sleep timing cat. (lin.) | 0.0089  | 0.0113  | 1.0089        | 0.43            |
|                        |                 |                                           | LNight x Sleep timing cat. (q.)   | 0.0090  | 0.0109  | 1.0090        | 0.41            |
|                        |                 |                                           |                                   |         |         |               |                 |
| 8 right                | Aircraft        | Sleep timing <sup>f</sup>                 | Intercept                         | -7.5692 | 0.4433  | 0.0005        | <b>&lt;0.01</b> |
|                        |                 |                                           | LNight [dB(A)]                    | 0.1194  | 0.0074  | 1.1268        | <b>&lt;0.01</b> |
|                        |                 |                                           | Male Sex [vs. female]             | 0.0714  | 0.1320  | 1.0740        | 0.59            |
|                        |                 |                                           | Age [years]                       | 0.0144  | 0.0044  | 1.0145        | <b>&lt;0.01</b> |
|                        |                 |                                           | German [vs. FR/IT]                | -0.1497 | 0.1370  | 0.8610        | 0.27            |
|                        |                 |                                           | Postal mode [vs. online]          | 0.1632  | 0.1627  | 1.1772        | 0.32            |
|                        |                 |                                           | Sleep timing cat. (linear)        | 0.0359  | 0.5416  | 1.0366        | 0.95            |
|                        |                 |                                           | Sleep timing cat. (quadratic)     | 0.6687  | 0.5908  | 1.9516        | 0.26            |
|                        |                 |                                           | LNight x Sleep timing cat. (lin.) | -0.0091 | 0.0123  | 0.9909        | 0.46            |
|                        |                 |                                           | LNight x Sleep timing cat. (q.)   | -0.0167 | 0.0132  | 0.9835        | 0.21            |
|                        |                 |                                           |                                   |         |         |               |                 |
| 9 left                 | Road traffic    | Sleep duration <sup>g</sup>               | Intercept                         | -7.5085 | 0.4667  | 0.0005        | <b>&lt;0.01</b> |
|                        |                 |                                           | LNight [dB(A)]                    | 0.1023  | 0.0074  | 1.1077        | <b>&lt;0.01</b> |
|                        |                 |                                           | Male Sex [vs. female]             | -0.0891 | 0.1140  | 0.9147        | 0.43            |
|                        |                 |                                           | Age [years]                       | 0.0044  | 0.0038  | 1.0045        | 0.24            |

| Figure #<br>in article | Noise<br>source | Effect<br>modification<br>factor in focus | Effect                              | B       | SE of B | Odds<br>Ratio | p-Value |
|------------------------|-----------------|-------------------------------------------|-------------------------------------|---------|---------|---------------|---------|
| 9 middle               | Railways        | Sleep duration <sup>g</sup>               | German [vs. FR/IT]                  | -0.3212 | 0.1129  | 0.7252        | <0.01   |
|                        |                 |                                           | Postal mode [vs. online]            | -0.0277 | 0.1287  | 0.9726        | 0.83    |
|                        |                 |                                           | Sleep duration cat. (linear)        | -0.7639 | 0.7067  | 0.4659        | 0.28    |
|                        |                 |                                           | Sleep duration cat. (quadratic)     | -0.1070 | 0.6796  | 0.8985        | 0.87    |
|                        |                 |                                           | LNight x Sleep duration cat. (lin.) | 0.0141  | 0.0129  | 1.0142        | 0.28    |
|                        |                 |                                           | LNight x Sleep duration cat. (q.)   | -0.0015 | 0.0125  | 0.9985        | 0.91    |
|                        |                 |                                           | Intercept                           | -7.9778 | 0.4783  | 0.0003        | <0.01   |
|                        |                 |                                           | LNight [dB(A)]                      | 0.1104  | 0.0068  | 1.1167        | <0.01   |
|                        |                 |                                           | Male Sex [vs. female]               | -0.0532 | 0.1435  | 0.9481        | 0.71    |
|                        |                 |                                           | Age [years]                         | -0.0011 | 0.0046  | 0.9989        | 0.81    |
|                        |                 |                                           | German [vs. FR/IT]                  | -0.0237 | 0.1493  | 0.9766        | 0.87    |
|                        |                 |                                           | Postal mode [vs. online]            | 0.5283  | 0.1724  | 1.6961        | <0.01   |
|                        |                 |                                           | Sleep duration cat. (linear)        | -0.4403 | 0.6400  | 0.6438        | 0.49    |
|                        |                 |                                           | Sleep duration cat. (quadratic)     | 0.3124  | 0.6765  | 1.3667        | 0.64    |
|                        |                 |                                           | LNight x Sleep duration cat. (lin.) | 0.0056  | 0.0115  | 1.0056        | 0.63    |
|                        |                 |                                           | LNight x Sleep duration cat. (q.)   | -0.0060 | 0.0121  | 0.9940        | 0.62    |
| 9 right                | Aircraft        | Sleep duration <sup>g</sup>               | Intercept                           | -8.0869 | 0.4929  | 0.0003        | <0.01   |
|                        |                 |                                           | LNight [dB(A)]                      | 0.1277  | 0.0082  | 1.1362        | <0.01   |
|                        |                 |                                           | Male Sex [vs. female]               | 0.0809  | 0.1459  | 1.0842        | 0.58    |
|                        |                 |                                           | Age [years]                         | 0.0160  | 0.0049  | 1.0162        | <0.01   |
|                        |                 |                                           | German [vs. FR/IT]                  | -0.0412 | 0.1516  | 0.9596        | 0.79    |
|                        |                 |                                           | Postal mode [vs. online]            | 0.2203  | 0.1700  | 1.2465        | 0.19    |
|                        |                 |                                           | Sleep duration cat. (linear)        | -0.2269 | 0.6255  | 0.7970        | 0.72    |
|                        |                 |                                           | Sleep duration cat. (quadratic)     | 0.3438  | 0.6246  | 1.4103        | 0.58    |
|                        |                 |                                           | LNight x Sleep duration cat. (lin.) | 0.0071  | 0.0140  | 1.0071        | 0.61    |
|                        |                 |                                           | LNight x Sleep duration cat. (q.)   | -0.0143 | 0.0141  | 0.9858        | 0.31    |
| 10 left                | Road traffic    | Sleep medic.                              | Intercept                           | -7.3763 | 0.4443  | 0.0006        | <0.01   |
|                        |                 |                                           | LNight                              | 0.0993  | 0.0071  | 1.1044        | <0.01   |
|                        |                 |                                           | Male Sex [vs. female]               | -0.0469 | 0.1017  | 0.9542        | 0.64    |
|                        |                 |                                           | Age                                 | 0.0020  | 0.0034  | 1.0020        | 0.55    |
|                        |                 |                                           | German [vs. FR/IT]                  | -0.2208 | 0.1023  | 0.8019        | 0.03    |
|                        |                 |                                           | Postal mode [vs. online]            | -0.0337 | 0.1241  | 0.9669        | 0.79    |
|                        |                 |                                           | Sleep medication intake [vs. not]   | 1.6308  | 1.0288  | 5.1082        | 0.11    |
|                        |                 |                                           | LNight x Sleep medication intake    | -0.0165 | 0.0191  | 0.9837        | 0.39    |
| 10 middle              | Railways        | Sleep medic.                              | Intercept                           | -8.2086 | 0.4532  | 0.0003        | <0.01   |
|                        |                 |                                           | LNight                              | 0.1118  | 0.0065  | 1.1183        | <0.01   |
|                        |                 |                                           | Male Sex [vs. female]               | 0.0287  | 0.1275  | 1.0292        | 0.82    |
|                        |                 |                                           | Age                                 | -0.0002 | 0.0043  | 0.9998        | 0.97    |
|                        |                 |                                           | German [vs. FR/IT]                  | 0.0394  | 0.1360  | 1.0402        | 0.77    |
|                        |                 |                                           | Postal mode [vs. online]            | 0.4991  | 0.1681  | 1.6472        | <0.01   |
|                        |                 |                                           | Sleep medication intake [vs. not]   | 0.3161  | 1.1827  | 1.3718        | 0.79    |
|                        |                 |                                           | LNight x Sleep medication intake    | 0.0039  | 0.0218  | 1.0039        | 0.86    |
| 10 right               | Aircraft        | Sleep medic.                              | Intercept                           | -7.7647 | 0.4422  | 0.0004        | <0.01   |
|                        |                 |                                           | LNight                              | 0.1216  | 0.0074  | 1.1293        | <0.01   |
|                        |                 |                                           | Male Sex [vs. female]               | 0.0397  | 0.1273  | 1.0405        | 0.75    |
|                        |                 |                                           | Age                                 | 0.0162  | 0.0043  | 1.0163        | <0.01   |
|                        |                 |                                           | German [vs. FR/IT]                  | -0.0718 | 0.1338  | 0.9308        | 0.59    |
|                        |                 |                                           | Postal mode [vs. online]            | 0.2193  | 0.1609  | 1.2452        | 0.17    |
|                        |                 |                                           | Sleep medication intake [vs. not]   | 0.9243  | 1.1884  | 2.5202        | 0.44    |
|                        |                 |                                           | LNight x Sleep medication intake    | -0.0267 | 0.0277  | 0.9737        | 0.34    |
| 11 left                | Road traffic    | Season <sup>h</sup>                       | Intercept                           | -7.4952 | 0.7559  | 0.0006        | <0.01   |
|                        |                 |                                           | LNight [dB(A)]                      | 0.0976  | 0.0133  | 1.1026        | <0.01   |
|                        |                 |                                           | Male Sex [vs. female]               | -0.0775 | 0.1000  | 0.9254        | 0.44    |
|                        |                 |                                           | Age [years]                         | 0.0034  | 0.0033  | 1.0034        | 0.31    |
|                        |                 |                                           |                                     |         |         |               |         |

| Figure #<br>in article | Noise<br>source | Effect<br>modification<br>factor in focus | Effect                             | B       | SE of B | Odds<br>Ratio | p-Value         |
|------------------------|-----------------|-------------------------------------------|------------------------------------|---------|---------|---------------|-----------------|
| 11 middle              | Railways        | Season <sup>h</sup>                       | German [vs. FR/IT]                 | -0.2555 | 0.1006  | 0.7745        | <b>0.01</b>     |
|                        |                 |                                           | Postal mode [vs. online]           | 0.0135  | 0.1238  | 1.0136        | 0.91            |
|                        |                 |                                           | Spring (vs. Winter)                | 0.1014  | 1.0285  | 1.1067        | 0.92            |
|                        |                 |                                           | Summer (vs. Winter)                | 0.8936  | 0.9613  | 2.4439        | 0.35            |
|                        |                 |                                           | Autumn (vs. Winter)                | -0.4195 | 1.0576  | 0.6574        | 0.69            |
|                        |                 |                                           | LNight x Spring vs. Winter         | 0.0008  | 0.0189  | 1.0008        | 0.97            |
|                        |                 |                                           | LNight x Summer vs. Winter         | -0.0076 | 0.0178  | 0.9924        | 0.67            |
|                        |                 |                                           | LNight x Autumn vs. Winter         | 0.0130  | 0.0194  | 1.0131        | 0.50            |
|                        |                 |                                           | Intercept                          | -7.9677 | 0.7170  | 0.0003        | <b>&lt;0.01</b> |
|                        |                 |                                           | LNight [dB(A)]                     | 0.1068  | 0.0119  | 1.1127        | <b>&lt;0.01</b> |
|                        |                 |                                           | Male Sex [vs. female]              | 0.0111  | 0.1263  | 1.0112        | 0.93            |
|                        |                 |                                           | Age [years]                        | 0.0013  | 0.0042  | 1.0013        | 0.76            |
|                        |                 |                                           | German [vs. FR/IT]                 | 0.0002  | 0.1344  | 1.0002        | 1.00            |
|                        |                 |                                           | Postal mode [vs. online]           | 0.5083  | 0.1685  | 1.6625        | <b>&lt;0.01</b> |
|                        |                 |                                           | Spring (vs. Winter)                | -0.0193 | 0.9396  | 0.9809        | 0.98            |
|                        |                 |                                           | Summer (vs. Winter)                | -0.5253 | 0.9460  | 0.5914        | 0.58            |
|                        |                 |                                           | Autumn (vs. Winter)                | -0.6299 | 1.0050  | 0.5326        | 0.53            |
|                        |                 |                                           | LNight x Spring vs. Winter         | 0.0004  | 0.0171  | 1.0004        | 0.98            |
|                        |                 |                                           | LNight x Summer vs. Winter         | 0.0126  | 0.0170  | 1.0126        | 0.46            |
|                        |                 |                                           | LNight x Autumn vs. Winter         | 0.0105  | 0.0180  | 1.0106        | 0.56            |
| 11 right               | Aircraft        | Season <sup>h</sup>                       | Intercept                          | -6.8414 | 0.6297  | 0.0011        | <b>&lt;0.01</b> |
|                        |                 |                                           | LNight [dB(A)]                     | 0.0970  | 0.0129  | 1.1019        | <b>&lt;0.01</b> |
|                        |                 |                                           | Male Sex [vs. female]              | 0.0382  | 0.1266  | 1.0389        | 0.76            |
|                        |                 |                                           | Age [years]                        | 0.0161  | 0.0043  | 1.0162        | <b>&lt;0.01</b> |
|                        |                 |                                           | German [vs. FR/IT]                 | -0.0416 | 0.1333  | 0.9593        | 0.76            |
|                        |                 |                                           | Postal mode [vs. online]           | 0.2162  | 0.1613  | 1.2414        | 0.18            |
|                        |                 |                                           | Spring (vs. Winter)                | -1.2146 | 0.8547  | 0.2968        | 0.16            |
|                        |                 |                                           | Summer (vs. Winter)                | -1.1207 | 0.8197  | 0.3261        | 0.17            |
|                        |                 |                                           | Autumn (vs. Winter)                | -1.1605 | 0.8775  | 0.3133        | 0.19            |
|                        |                 |                                           | LNight x Spring vs. Winter         | 0.0282  | 0.0194  | 1.0287        | 0.14            |
|                        |                 |                                           | LNight x Summer vs. Winter         | 0.0342  | 0.0186  | 1.0348        | 0.07            |
|                        |                 |                                           | LNight x Autumn vs. Winter         | 0.0288  | 0.0200  | 1.0292        | 0.15            |
| 12 left                | Road traffic    | Temperature <sup>i</sup>                  | Intercept                          | -7.3438 | 0.4182  | 0.0006        | <b>&lt;0.01</b> |
|                        |                 |                                           | LNight [dB(A)]                     | 0.0986  | 0.0066  | 1.1037        | <b>&lt;0.01</b> |
|                        |                 |                                           | Male Sex [vs. female]              | -0.0757 | 0.0999  | 0.9271        | 0.45            |
|                        |                 |                                           | Age [years]                        | 0.0035  | 0.0033  | 1.0035        | 0.30            |
|                        |                 |                                           | German [vs. FR/IT]                 | -0.2285 | 0.1024  | 0.7957        | <b>0.03</b>     |
|                        |                 |                                           | Postal mode [vs. online]           | 0.0135  | 0.1240  | 1.0136        | 0.91            |
|                        |                 |                                           | Temperature cat. (linear)          | 0.7597  | 0.6031  | 2.1377        | 0.21            |
|                        |                 |                                           | Temperature cat. (quadratic)       | 0.4873  | 0.6285  | 1.6279        | 0.44            |
|                        |                 |                                           | LNight x Temperature cat. (linear) | -0.0104 | 0.0111  | 0.9897        | 0.35            |
|                        |                 |                                           | LNight x Temperature cat. (q.)     | -0.0090 | 0.0116  | 0.9910        | 0.43            |
| 12 middle              | Railways        | Temperature <sup>i</sup>                  | Intercept                          | -8.2718 | 0.4394  | 0.0003        | <b>&lt;0.01</b> |
|                        |                 |                                           | LNight [dB(A)]                     | 0.1125  | 0.0062  | 1.1191        | <b>&lt;0.01</b> |
|                        |                 |                                           | Male Sex [vs. female]              | 0.0138  | 0.1261  | 1.0139        | 0.91            |
|                        |                 |                                           | Age [years]                        | 0.0014  | 0.0042  | 1.0014        | 0.75            |
|                        |                 |                                           | German [vs. FR/IT]                 | 0.0252  | 0.1373  | 1.0256        | 0.85            |
|                        |                 |                                           | Postal mode [vs. online]           | 0.5136  | 0.1687  | 1.6713        | <b>&lt;0.01</b> |
|                        |                 |                                           | Temperature cat. (linear)          | -0.0420 | 0.6003  | 0.9589        | 0.94            |
|                        |                 |                                           | Temperature cat. (quadratic)       | -0.1522 | 0.5936  | 0.8588        | 0.80            |
|                        |                 |                                           | LNight x Temperature cat. (linear) | 0.0029  | 0.0108  | 1.0029        | 0.79            |
|                        |                 |                                           | LNight x Temperature cat. (q.)     | 0.0029  | 0.0107  | 1.0029        | 0.78            |
| 12 right               | Aircraft        | Temperature <sup>i</sup>                  | Intercept                          | -7.7071 | 0.4282  | 0.0004        | <b>&lt;0.01</b> |
|                        |                 |                                           | LNight [dB(A)]                     | 0.1193  | 0.0071  | 1.1267        | <b>&lt;0.01</b> |

| Figure #<br>in article | Noise<br>source | Effect<br>modification<br>factor in focus | Effect                             | B       | SE of B | Odds<br>Ratio | p-Value         |
|------------------------|-----------------|-------------------------------------------|------------------------------------|---------|---------|---------------|-----------------|
|                        |                 |                                           | Male Sex [vs. female]              | 0.0320  | 0.1263  | 1.0325        | 0.80            |
|                        |                 |                                           | Age [years]                        | 0.0159  | 0.0043  | 1.0161        | <b>&lt;0.01</b> |
|                        |                 |                                           | German [vs. FR/IT]                 | -0.0106 | 0.1355  | 0.9895        | 0.94            |
|                        |                 |                                           | Postal mode [vs. online]           | 0.2215  | 0.1609  | 1.2480        | 0.17            |
|                        |                 |                                           | Temperature cat. (linear)          | -0.6986 | 0.5307  | 0.4973        | 0.19            |
|                        |                 |                                           | Temperature cat. (quadratic)       | 0.1079  | 0.5355  | 1.1139        | 0.84            |
|                        |                 |                                           | LNight x Temperature cat. (linear) | 0.0202  | 0.0120  | 1.0204        | 0.09            |
|                        |                 |                                           | LNight x Temperature cat. (q.)     | -0.0018 | 0.0122  | 0.9982        | 0.88            |

- <sup>a</sup> Modeled as ordered factor with three levels, thus results consider linear and quadratic contrasts; Coding: value 1 for "low", 2 for "medium", and 3 for "high" IR
- <sup>b</sup> Modeled as ordered factor with three levels, thus results consider linear and quadratic contrasts; Coding: value 0 for "closed", 1 for "half open/tilted", 2 for "fully open" windows
- <sup>c</sup> Modeled as ordered factor with four levels, thus results consider linear, quadratic, and cubic contrasts; Coding: value 1 for <5 dB category, 2 for 5-10 dB category, 3 for 10-20 dB category, 4 for >20 dB category
- <sup>d</sup> Assumed an interval scaled predictor with the values 0 (away from street, corresponding to an angle of 0°), 90 (sideways to street, angle 90°), 180 (pointing towards street, angle 180°)
- <sup>e</sup> Degree of urbanization indicator used by Eurostat, modeled as ordered factor with three levels, thus results consider linear and quadratic contrasts; Coding: value 1 for "cities", 2 for "towns and suburbs", and 3 for "rural areas"
- <sup>f</sup> Modeled as ordered factor with three levels, thus results consider linear and quadratic contrasts; Coding: value 1 for "early", 2 for "medium", 3 for "late" sleepers
- <sup>g</sup> Modeled as ordered factor with three levels, thus results consider linear and quadratic contrasts; Coding: value 1 for "short", 2 for "medium", 3 for "long" sleepers
- <sup>h</sup> Reference category: Winter
- <sup>i</sup> Modeled as ordered factor with three levels, thus results consider linear and quadratic contrasts; Coding: value 1 for < 7 °C category, value 2 for 7 - 11 °C category, value 3 for > 11 °C category

## Supplementary Table S2

Explained variance (pseudo  $R^2$ ) and goodness-of-fit statistics of adjusted models using different noise exposure indicators (regarding façade point assignments and time windows) on which the probability of being highly sleep disturbed ( $P_{HSD}$ ) was regressed, with covariates centered on the mean. Abbreviations: AIC=Akaike Information Criterion; BIC=Bayesian Information Criterion; M-Z  $R^2$ =McKelvey&Zavoina pseudo  $R^2$ ; NK  $R^2$ =Nagelkerke pseudo  $R^2$ . The tables for each noise source are sorted in ascending order of AIC.

### Road traffic noise:

| Exposure indicator               | AIC     | BIC     | M-Z $R^2$ | NK $R^2$ | Log-Likelihood | Deviance |
|----------------------------------|---------|---------|-----------|----------|----------------|----------|
| Estimated bedroom outdoor LNight | 2820.16 | 2859.52 | 0.26      | 0.16     | -1404.08       | 2808.16  |
| Leq05-06h at max. façade         | 2941.79 | 2981.16 | 0.20      | 0.11     | -1464.9        | 2929.79  |
| Leq06-07h at max. façade         | 2942.45 | 2981.82 | 0.20      | 0.11     | -1465.23       | 2930.45  |
| LNight at max. façade            | 2942.52 | 2981.88 | 0.20      | 0.11     | -1465.26       | 2930.52  |
| Lden at max. façade              | 2942.57 | 2981.94 | 0.20      | 0.11     | -1465.29       | 2930.57  |
| Leq24 at max. façade             | 2942.62 | 2981.98 | 0.20      | 0.11     | -1465.31       | 2930.62  |
| LDay at max. façade              | 2942.64 | 2982.00 | 0.20      | 0.11     | -1465.32       | 2930.64  |
| Leq01-05h at max. façade         | 2942.89 | 2982.25 | 0.20      | 0.11     | -1465.44       | 2930.89  |
| Leq19-23h at max. façade         | 2943.52 | 2982.88 | 0.20      | 0.11     | -1465.76       | 2931.52  |
| Leq23-01h at max. façade         | 2944.18 | 2983.55 | 0.19      | 0.11     | -1466.09       | 2932.18  |
| Estimated bedroom indoor LNight  | 2956.67 | 2996.03 | 0.17      | 0.11     | -1472.33       | 2944.67  |
| Leq05-06h at min. façade         | 3057.73 | 3097.09 | 0.10      | 0.07     | -1522.86       | 3045.73  |
| Leq24 at min. façade             | 3057.91 | 3097.27 | 0.10      | 0.07     | -1522.95       | 3045.91  |
| Leq06-07h at min. façade         | 3057.92 | 3097.28 | 0.10      | 0.07     | -1522.96       | 3045.92  |
| Lden at min. façade              | 3057.94 | 3097.30 | 0.10      | 0.07     | -1522.97       | 3045.94  |
| LDay at min. façade              | 3058.00 | 3097.36 | 0.10      | 0.07     | -1523.00       | 3046.00  |
| LNight at min. façade            | 3058.04 | 3097.40 | 0.10      | 0.07     | -1523.02       | 3046.04  |
| Leq19-23h at min. façade         | 3058.16 | 3097.53 | 0.10      | 0.07     | -1523.08       | 3046.16  |
| Leq01-05h at min. façade         | 3058.54 | 3097.90 | 0.10      | 0.07     | -1523.27       | 3046.54  |
| Leq23-01h at min. façade         | 3058.92 | 3098.29 | 0.10      | 0.07     | -1523.46       | 3046.92  |

**Railway noise:**

| Exposure indicator       | AIC     | BIC     | M-Z R <sup>2</sup> | NK R <sup>2</sup> | Log-Likelihood | Deviance |
|--------------------------|---------|---------|--------------------|-------------------|----------------|----------|
| Lden at max. façade      | 1756.57 | 1793.6  | 0.41               | 0.28              | -872.28        | 1744.57  |
| Leq24 at max. façade     | 1756.95 | 1793.99 | 0.41               | 0.28              | -872.48        | 1744.95  |
| Leq19-23h at max. façade | 1757.44 | 1794.48 | 0.41               | 0.28              | -872.72        | 1745.44  |
| Leq23-01h at max. façade | 1757.55 | 1794.58 | 0.41               | 0.28              | -872.77        | 1745.55  |
| Leq05-06h at max. façade | 1757.72 | 1794.75 | 0.41               | 0.28              | -872.86        | 1745.72  |
| LNight at max. façade    | 1758.14 | 1795.18 | 0.41               | 0.28              | -873.07        | 1746.14  |
| LDay at max. façade      | 1758.42 | 1795.46 | 0.41               | 0.28              | -873.21        | 1746.42  |
| Leq06-07h at max. façade | 1759.45 | 1796.49 | 0.41               | 0.28              | -873.73        | 1747.45  |
| Leq01-05h at max. façade | 1781.93 | 1818.96 | 0.39               | 0.27              | -884.96        | 1769.93  |
| Leq05-06h at min. façade | 1882.15 | 1919.18 | 0.30               | 0.22              | -935.07        | 1870.15  |
| Leq24 at min. façade     | 1882.65 | 1919.69 | 0.30               | 0.22              | -935.33        | 1870.65  |
| Lden at min. façade      | 1882.98 | 1920.02 | 0.30               | 0.22              | -935.49        | 1870.98  |
| Leq06-07h at min. façade | 1883.00 | 1920.04 | 0.30               | 0.22              | -935.50        | 1871.00  |
| Leq23-01h at min. façade | 1883.39 | 1920.43 | 0.30               | 0.22              | -935.70        | 1871.39  |
| Leq19-23h at min. façade | 1883.62 | 1920.66 | 0.30               | 0.22              | -935.81        | 1871.62  |
| LDay at min. façade      | 1883.83 | 1920.87 | 0.30               | 0.21              | -935.92        | 1871.83  |
| LNight at min. façade    | 1884.84 | 1921.88 | 0.30               | 0.21              | -936.42        | 1872.84  |
| Leq01-05 at min. façade  | 1913.35 | 1950.38 | 0.29               | 0.20              | -950.67        | 1901.35  |

**Aircraft noise:**

| Exposure indicator | AIC     | BIC     | M-Z R <sup>2</sup> | NK R <sup>2</sup> | Log-Likelihood | Deviance |
|--------------------|---------|---------|--------------------|-------------------|----------------|----------|
| LNight             | 1744.41 | 1780.3  | 0.32               | 0.25              | -866.21        | 1732.41  |
| Lden               | 1792.03 | 1827.92 | 0.31               | 0.22              | -890.02        | 1780.03  |
| Leq01-05h          | 1792.79 | 1828.68 | 0.24               | 0.22              | -890.39        | 1780.79  |
| Leq19-23h          | 1816.10 | 1851.98 | 0.30               | 0.21              | -902.05        | 1804.10  |
| Leq23-01h          | 1819.11 | 1855.00 | 0.28               | 0.21              | -903.56        | 1807.11  |
| Leq06-07h          | 1824.50 | 1860.38 | 0.28               | 0.21              | -906.25        | 1812.50  |
| Leq24              | 1847.31 | 1883.19 | 0.27               | 0.19              | -917.65        | 1835.31  |
| LDay               | 1863.93 | 1899.81 | 0.26               | 0.18              | -925.96        | 1851.93  |
| Leq05-06h          | 1908.17 | 1944.05 | 0.19               | 0.16              | -948.08        | 1896.17  |



## B) Supplementary Figures

Figure S1

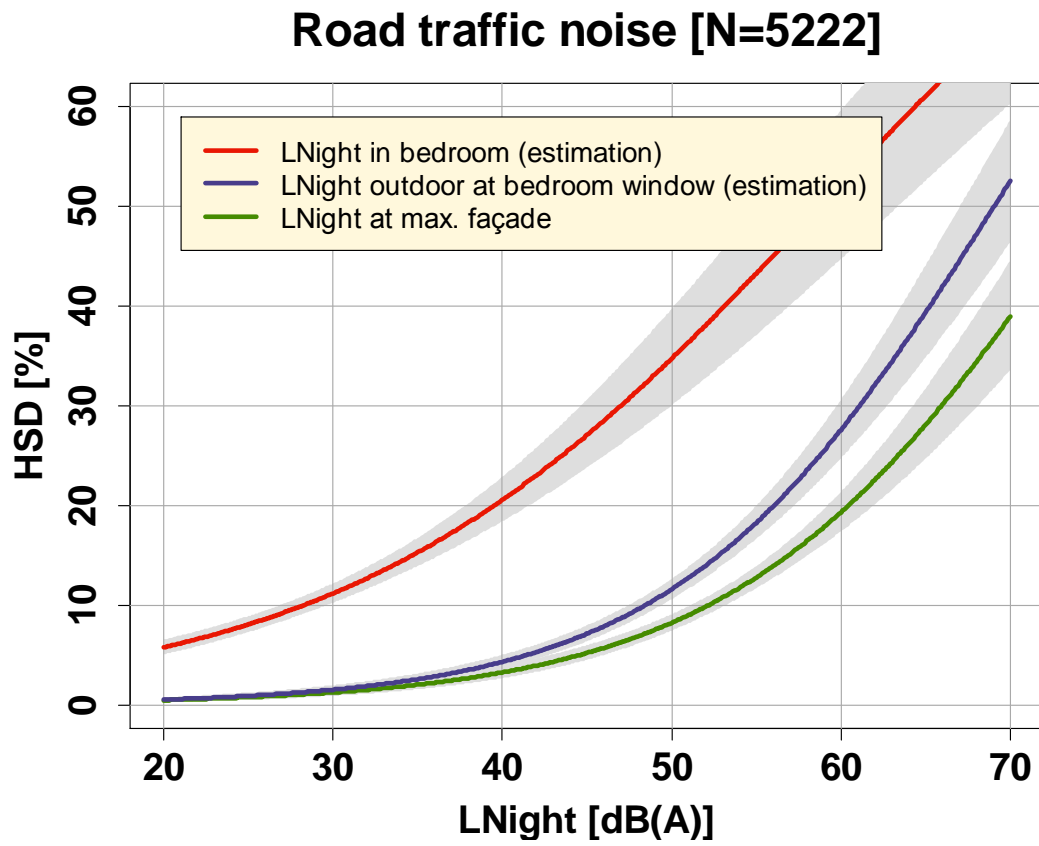

Figure S1: %HSD as function of road traffic noise (LNight) in the bedroom (red curve), outdoor at the bedroom window (blue curve), and at the maximum façade point (green curve). The curves are based on the adjusted model predictor set with covariates centered on the mean and include 95% confidence intervals as shaded areas.
