# Supplementary material for: Self-Reported Sleep Disturbance from Road, Rail and Aircraft Noise: Exposure-Response Relationships and Effect Modifiers in the SiRENE Study
Source: MDPI journal article supplement (doi:10.3390/ijerph16214186), 2019-10-29
Supplement: s1 [file s1]

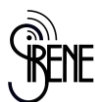

## Fragebogen zur SiRENE-Studie

Der vorliegende Fragebogen gliedert sich in die folgenden Teilbereiche: «Angaben zur Person und Wohnsituation»; «Störungen und Belästigungen durch Lärm»; «Zeitnutzung, Schlaf und Schlafqualität»; «Verhaltensweisen und Persönlichkeit»; «Allgemeine Gesundheit und Gesundheitsverhalten»; «Erwerbssituation und Beruf». Die Beantwortung möglichst aller Fragen ist sehr wichtig, auch wenn eine oder mehrere Fragen scheinbar nichts mit Lärm zu tun haben. Vielen Dank!

Bei Fragen mit einem oder mehreren runden Kästchen (○), kreuzen Sie bitte jeweils die Antwort an, die auf Sie am ehesten zutrifft. Falls mehrere Antworten zutreffen, kreuzen Sie bitte alle zutreffenden Antworten an. Bei Fragen mit einer gestrichelten Linie (.....) oder einem Unterstrich (\_\_\_\_) können Sie Wörter oder Zahlen eintragen. Bei Zahlen (1–2–3...) umkreisen Sie einfach die Zahl, die am ehesten zutrifft.

### 1. Angaben zur Person und zur Wohnsituation

|     |                                                                                                                                                                                                                                                                                                                                                                                                                                                                                                                                                                   |                                                      |
|-----|-------------------------------------------------------------------------------------------------------------------------------------------------------------------------------------------------------------------------------------------------------------------------------------------------------------------------------------------------------------------------------------------------------------------------------------------------------------------------------------------------------------------------------------------------------------------|------------------------------------------------------|
| 1.1 | Heutiges Datum: .....                                                                                                                                                                                                                                                                                                                                                                                                                                                                                                                                             | 1101                                                 |
| 1.2 | Jahrgang: ..... Geschlecht:   ○ Frau   ○ Mann                                                                                                                                                                                                                                                                                                                                                                                                                                                                                                                     | 1201/2                                               |
| 1.3 | Ist die Adresse im Begleitbrief der Ort, wo Sie die meiste Zeit wohnen?   ○ ja   ○ nein                                                                                                                                                                                                                                                                                                                                                                                                                                                                           | 1301                                                 |
| 1.4 | Wie lange wohnen Sie schon in Ihrer jetzigen Wohnung/Haus? ..... Jahre<br>Wie alt ist das Haus, in dem Sie wohnen? ..... Jahre   ○ weiss nicht                                                                                                                                                                                                                                                                                                                                                                                                                    | 1401<br>1402                                         |
| 1.5 | Wohnen Sie:   ○ alleine   ○ als Paar   ○ in einer WG   ○ anderes (○ mit Kind/ern)<br>Wenn Sie sich selbst dazuzählen, wie viele Personen<br>(inkl. Kinder) wohnen insgesamt in Ihrem Haushalt? ..... Personen                                                                                                                                                                                                                                                                                                                                                     | 1501<br>1502                                         |
| 1.6 | In welcher Art Wohnung/Haus wohnen Sie?<br>○ Einfamilienhaus / Doppelhaushälfte / Reihenhaus<br>○ Wohnung im Erdgeschoss/Parterre<br>○ Wohnung im ..... Stock<br><br>Verfügen Sie in Ihrer Wohnung über...<br>▪ Schallschutzfenster?   ○ ja   ○ nein   ○ weiss nicht<br>▪ Schalldämmlüfter?   ○ ja   ○ nein   ○ weiss nicht<br>▪ eine Komfortlüftung?   ○ ja   ○ nein   ○ weiss nicht<br><br>Sind Sie (Mit-)Eigentümer/in oder Mieter/in Ihrer Wohnung oder Ihres Hauses?<br>○ Hauseigentümer/in   ○ Stockwerkeigentümer/in   ○ Genossenschafter/in   ○ Mieter/in | 1601<br>1602<br><br>1603<br>1604<br>1605<br><br>1606 |
| 1.7 | Wie ist die Ausrichtung Ihres Schlafzimmers zur nächstgelegenen verkehrsreichen Strasse?<br>○ von der Strasse weg oder zu einem Innenhof   ○ seitlich zur Strasse   ○ auf die Strasse<br>Falls Ihr Schlafzimmer auf die Strasse gerichtet liegt, wie ist der Name dieser Strasse?<br>Name der Strasse: .....                                                                                                                                                                                                                                                      | 1701<br><br>1702                                     |

### 2. Störungen und Belästigungen durch Lärm

|     |                                                                                                                                                                                             |                           |
|-----|---------------------------------------------------------------------------------------------------------------------------------------------------------------------------------------------|---------------------------|
| 2.1 | Wenn Sie an die letzten zwölf Monate bei Ihnen denken, wie stark haben Sie sich durch Lärm von der Strasse, von der Eisenbahn oder von Flugzeugen insgesamt gestört oder belästigt gefühlt? |                           |
|     | überhaupt nicht    etwas    mittelmässig    stark    äusserst                                                                                                                               |                           |
|     | Strassenlärm                                                                                                                                                                                | ○ ——— ○ ——— ○ ——— ○ ——— ○ |
|     | Eisenbahnlärm                                                                                                                                                                               | ○ ——— ○ ——— ○ ——— ○ ——— ○ |
|     | Fluglärm                                                                                                                                                                                    | ○ ——— ○ ——— ○ ——— ○ ——— ○ |
|     |                                                                                                                                                                                             | 2101<br>2102<br>2103      |

## Fragebogen zur SiRENE-Studie

|                                                                                                                                                                                                                                                                                                                                                                                                                                                                                                                                                                                                                                                                                                                                                                                                                                                                                                                                                                                                                                                                                                                                      |                                                               |
|--------------------------------------------------------------------------------------------------------------------------------------------------------------------------------------------------------------------------------------------------------------------------------------------------------------------------------------------------------------------------------------------------------------------------------------------------------------------------------------------------------------------------------------------------------------------------------------------------------------------------------------------------------------------------------------------------------------------------------------------------------------------------------------------------------------------------------------------------------------------------------------------------------------------------------------------------------------------------------------------------------------------------------------------------------------------------------------------------------------------------------------|---------------------------------------------------------------|
| <p>2.2 Wenn Sie an die letzten zwölf Monate bei Ihnen denken, welche Zahl zwischen 0 und 10 gibt am besten an, wie stark Sie sich durch Lärm von der Strasse, von der Eisenbahn oder von Flugzeugen insgesamt gestört oder belästigt fühlten? <i>(bitte die passende Zahl umkreisen)</i></p> <div style="display: flex; justify-content: space-between;"> <div style="width: 60%;"> <p>Strassenlärm</p> <p>Eisenbahnlärm</p> <p>Fluglärm</p> </div> <div style="width: 35%;"> <p>0 1 2 3 4 5 6 7 8 9 10</p> <p>0 1 2 3 4 5 6 7 8 9 10</p> <p>0 1 2 3 4 5 6 7 8 9 10</p> <p>überhaupt nicht äusserst</p> </div> </div>                                                                                                                                                                                                                                                                                                                                                                                                                                                                                                                | <p>2201</p> <p>2202</p> <p>2203</p>                           |
| <p>2.3 Werden Sie durch <u>Strassenlärm zu bestimmten Zeiten</u> (am Tag oder in der Nacht) besonders stark gestört oder belästigt?</p> <p><input type="radio"/> nein</p> <p><input type="radio"/> ja, von _____ : _____ bis _____ : _____ Uhr</p> <p>und von _____ : _____ bis _____ : _____ Uhr</p> <p>und von _____ : _____ bis _____ : _____ Uhr</p>                                                                                                                                                                                                                                                                                                                                                                                                                                                                                                                                                                                                                                                                                                                                                                             | <p>2301</p> <p>2302</p> <p>2303</p>                           |
| <p>2.4 Werden Sie durch <u>Eisenbahnlärm zu bestimmten Zeiten</u> (am Tag oder in der Nacht) besonders stark gestört oder belästigt?</p> <p><input type="radio"/> nein</p> <p><input type="radio"/> ja, von _____ : _____ bis _____ : _____ Uhr</p> <p>und von _____ : _____ bis _____ : _____ Uhr</p> <p>und von _____ : _____ bis _____ : _____ Uhr</p>                                                                                                                                                                                                                                                                                                                                                                                                                                                                                                                                                                                                                                                                                                                                                                            | <p>2401</p> <p>2402</p> <p>2403</p>                           |
| <p>2.5 Werden Sie durch <u>Fluglärm zu bestimmten Zeiten</u> (am Tag oder in der Nacht) besonders stark gestört oder belästigt?</p> <p><input type="radio"/> nein</p> <p><input type="radio"/> ja, von _____ : _____ bis _____ : _____ Uhr</p> <p>und von _____ : _____ bis _____ : _____ Uhr</p> <p>und von _____ : _____ bis _____ : _____ Uhr</p>                                                                                                                                                                                                                                                                                                                                                                                                                                                                                                                                                                                                                                                                                                                                                                                 | <p>2501</p> <p>2502</p> <p>2503</p>                           |
| <p>2.6 Wenn Sie an die letzten zwölf Monate bei Ihnen denken, wie stark haben Sie sich durch Lärm der folgenden Quellen, <u>in der Nacht, wenn Sie schlafen wollen</u>, gestört oder belästigt gefühlt?</p> <div style="display: flex; justify-content: space-between;"> <div style="width: 60%;"> <p>Strassenlärm</p> <p>Eisenbahnlärm</p> <p>Fluglärm</p> <p>Lärm aus der Nachbarschaft</p> <p>Anderes: .....</p> </div> <div style="width: 35%;"> <p>überhaupt nicht etwas mittelmässig stark äusserst</p> <p><input type="radio"/> <input type="radio"/> <input type="radio"/> <input type="radio"/> <input type="radio"/></p> <p><input type="radio"/> <input type="radio"/> <input type="radio"/> <input type="radio"/> <input type="radio"/></p> <p><input type="radio"/> <input type="radio"/> <input type="radio"/> <input type="radio"/> <input type="radio"/></p> <p><input type="radio"/> <input type="radio"/> <input type="radio"/> <input type="radio"/> <input type="radio"/></p> <p><input type="radio"/> <input type="radio"/> <input type="radio"/> <input type="radio"/> <input type="radio"/></p> </div> </div> | <p>2601</p> <p>2602</p> <p>2603</p> <p>2604</p> <p>2605/6</p> |
| <p>2.7 Insgesamt betrachtet: Durch welche Lärmquelle haben Sie sich in Ihrem Wohngebiet in den letzten 12 Monaten am stärksten gestört oder belästigt gefühlt?</p> <p><input type="radio"/> Strassenlärm</p> <p><input type="radio"/> Eisenbahnlärm</p> <p><input type="radio"/> Fluglärm</p> <p><input type="radio"/> Lärm von Industrie und Gewerbe</p> <p><input type="radio"/> Lärm von Nachbarn</p> <p><input type="radio"/> Lärm von Bars/Sport/Freizeitveranstaltungen etc.</p> <p><input type="radio"/> anderer Lärm, nämlich: .....</p>                                                                                                                                                                                                                                                                                                                                                                                                                                                                                                                                                                                     | <p>2701</p> <p>2702</p>                                       |
| <p>2.8 Als nächstes geht es um Ihre Empfindlichkeit gegenüber Lärm. Wie stark sind Sie mit folgender Aussage einverstanden?</p> <p><input type="checkbox"/> Ich bin lärmempfindlich</p> <p style="text-align: center;">ganz und gar einverstanden</p> <p style="text-align: center;"><input type="radio"/> <input type="radio"/> <input type="radio"/> <input type="radio"/> <input type="radio"/> <input type="radio"/></p> <p style="text-align: right;">gar nicht einverstanden</p>                                                                                                                                                                                                                                                                                                                                                                                                                                                                                                                                                                                                                                               | <p>2801</p>                                                   |
| <p>2.9 Bitte gehen Sie die auf der nächsten Seite folgenden 13 Aussagen der Reihe nach durch. Versuchen Sie bitte, sich in die jeweilige Situation hineinzusetzen. Kreuzen Sie die Antwortmöglichkeit an, die Ihrer Meinung nach am besten auf Sie zutrifft.</p> <p style="text-align: right;">→ nächste Seite</p>                                                                                                                                                                                                                                                                                                                                                                                                                                                                                                                                                                                                                                                                                                                                                                                                                   |                                                               |

## Fragebogen zur SiRENE-Studie

|                                                                                                                                                                                                                                                                                                                                               | stimmt<br>genau       | stimmt<br>eher        | stimmt<br>eher nicht  | stimmt<br>gar nicht   |      |
|-----------------------------------------------------------------------------------------------------------------------------------------------------------------------------------------------------------------------------------------------------------------------------------------------------------------------------------------------|-----------------------|-----------------------|-----------------------|-----------------------|------|
| ▪ Gesunder Schlaf ist für mich nur in absolut ruhiger Umgebung möglich _____                                                                                                                                                                                                                                                                  | <input type="radio"/> | <input type="radio"/> | <input type="radio"/> | <input type="radio"/> | 2901 |
| ▪ Neue Aufgaben kann ich nur in leiser Umgebung bearbeiten _____                                                                                                                                                                                                                                                                              | <input type="radio"/> | <input type="radio"/> | <input type="radio"/> | <input type="radio"/> | 2902 |
| ▪ Ich kann mich schnell an Lärm in meiner Wohnumgebung gewöhnen _____                                                                                                                                                                                                                                                                         | <input type="radio"/> | <input type="radio"/> | <input type="radio"/> | <input type="radio"/> | 2903 |
| ▪ Ich werde sehr unruhig, wenn ich beim Einschlafen jemanden reden höre _____                                                                                                                                                                                                                                                                 | <input type="radio"/> | <input type="radio"/> | <input type="radio"/> | <input type="radio"/> | 2904 |
| ▪ Ich bin sehr empfindlich gegenüber Geräuschen aus meiner Nachbarschaft _____                                                                                                                                                                                                                                                                | <input type="radio"/> | <input type="radio"/> | <input type="radio"/> | <input type="radio"/> | 2905 |
| ▪ Wenn Personen um mich herum laut sind, komme ich mit meiner Arbeit nicht voran _____                                                                                                                                                                                                                                                        | <input type="radio"/> | <input type="radio"/> | <input type="radio"/> | <input type="radio"/> | 2906 |
| ▪ Ich bin geräuschempfindlich _____                                                                                                                                                                                                                                                                                                           | <input type="radio"/> | <input type="radio"/> | <input type="radio"/> | <input type="radio"/> | 2907 |
| ▪ Meine Leistung wird durch eine grosse Geräuschkulisse stark beeinträchtigt _____                                                                                                                                                                                                                                                            | <input type="radio"/> | <input type="radio"/> | <input type="radio"/> | <input type="radio"/> | 2908 |
| ▪ Wenn es nachts laut ist, bin ich morgens unausgeschlafen _____                                                                                                                                                                                                                                                                              | <input type="radio"/> | <input type="radio"/> | <input type="radio"/> | <input type="radio"/> | 2909 |
| ▪ Es würde mir nichts ausmachen, an einer lauten Strasse zu wohnen _____                                                                                                                                                                                                                                                                      | <input type="radio"/> | <input type="radio"/> | <input type="radio"/> | <input type="radio"/> | 2910 |
| ▪ Für eine ruhige Wohnlage nehme ich andere Nachteile in Kauf _____                                                                                                                                                                                                                                                                           | <input type="radio"/> | <input type="radio"/> | <input type="radio"/> | <input type="radio"/> | 2911 |
| ▪ Für anstrengende Arbeiten brauche ich äusserste Ruhe _____                                                                                                                                                                                                                                                                                  | <input type="radio"/> | <input type="radio"/> | <input type="radio"/> | <input type="radio"/> | 2912 |
| ▪ Ich kann einschlafen, obwohl es laut um mich herum ist _____                                                                                                                                                                                                                                                                                | <input type="radio"/> | <input type="radio"/> | <input type="radio"/> | <input type="radio"/> | 2913 |
| <p>2.10 Im Folgenden geht es um Ihre Einstellung zur Umwelt und zum Lärm. Bitte antworten Sie möglichst spontan.</p> <p>Was ist Ihnen wichtiger?</p> <p><input type="radio"/> Ein starker Wirtschaftsstandort / eine Wirtschaft die sich frei entfalten kann</p> <p><input type="radio"/> Ruhe und Umweltschutz / strenge Umwelt-Auflagen</p> |                       |                       |                       |                       | 2100 |

### 3. Zeitnutzung, Schlaf und Schlafqualität

|     |                                                                                                                                                                                                                                                                                                                                                                                                                                                                                                                                                                                               |      |
|-----|-----------------------------------------------------------------------------------------------------------------------------------------------------------------------------------------------------------------------------------------------------------------------------------------------------------------------------------------------------------------------------------------------------------------------------------------------------------------------------------------------------------------------------------------------------------------------------------------------|------|
| 3.1 | <p>Wann gehen Sie an einem durchschnittlichen Wochentag (Mo-Fr) normalerweise (morgens) aus dem Haus? um _____ : _____ Uhr</p> <p>Und wann kehren Sie normalerweise nach Hause zurück? um _____ : _____ Uhr</p>                                                                                                                                                                                                                                                                                                                                                                               | 3101 |
|     |                                                                                                                                                                                                                                                                                                                                                                                                                                                                                                                                                                                               | 3102 |
| 3.2 | <p>Wie häufig im Monat arbeiten Sie normalerweise in der Nacht, d.h. zwischen 23 Uhr und 6 Uhr morgens?</p> <p><input type="radio"/> Nie      <input type="radio"/> Anzahl Nächte pro Monat: .....</p>                                                                                                                                                                                                                                                                                                                                                                                        | 3201 |
| 3.3 | <p>Die folgenden Fragen betreffen Ihre üblichen Schlafgewohnheiten. Ihre Antworten sollten möglichst genau sein und sich auf die Mehrzahl der Tage und Nächte <u>während der letzten vier Wochen</u> beziehen.</p> <p>Nach dem Zubettgehen, um welche Uhrzeit etwa löschen Sie normalerweise das Licht?</p> <p>▪ während der Woche: (So-Do) um _____ : _____ Uhr</p> <p>▪ am Wochenende: (Fr-Sa) um _____ : _____ Uhr</p> <p>und wann stehen Sie normalerweise morgens auf?</p> <p>▪ während der Woche: (Mo-Fr) um _____ : _____ Uhr</p> <p>▪ am Wochenende: (Sa-So) um _____ : _____ Uhr</p> |      |
|     |                                                                                                                                                                                                                                                                                                                                                                                                                                                                                                                                                                                               | 3301 |
|     |                                                                                                                                                                                                                                                                                                                                                                                                                                                                                                                                                                                               | 3302 |
|     |                                                                                                                                                                                                                                                                                                                                                                                                                                                                                                                                                                                               | 3303 |
|     |                                                                                                                                                                                                                                                                                                                                                                                                                                                                                                                                                                                               | 3304 |

## Fragebogen zur SiRENE-Studie

|     |                                                                                                                                        |                                     |                                                       |                               |                       |                       |                       |      |
|-----|----------------------------------------------------------------------------------------------------------------------------------------|-------------------------------------|-------------------------------------------------------|-------------------------------|-----------------------|-----------------------|-----------------------|------|
| 3.4 | Wie häufig passiert es Ihnen, dass Sie...                                                                                              | nie                                 | selten                                                | manch-<br>mal                 | häufig                |                       |                       |      |
|     | ▪ ... schlecht einschlafen                                                                                                             | <input type="radio"/>               | <input type="radio"/>                                 | <input type="radio"/>         | <input type="radio"/> | 3401                  |                       |      |
|     | ▪ ... einen unruhigen Schlaf haben                                                                                                     | <input type="radio"/>               | <input type="radio"/>                                 | <input type="radio"/>         | <input type="radio"/> | 3402                  |                       |      |
|     | ▪ ... nachts mehrmals aufwachen                                                                                                        | <input type="radio"/>               | <input type="radio"/>                                 | <input type="radio"/>         | <input type="radio"/> | 3403                  |                       |      |
|     | ▪ ... morgens zu früh aufwachen                                                                                                        | <input type="radio"/>               | <input type="radio"/>                                 | <input type="radio"/>         | <input type="radio"/> | 3404                  |                       |      |
|     | ▪ ... Sie sich morgens nicht ausgeschlafen fühlen                                                                                      | <input type="radio"/>               | <input type="radio"/>                                 | <input type="radio"/>         | <input type="radio"/> | 3405                  |                       |      |
|     | ▪ ... Sie wegen Geräuschen im Haus (z.B. vom Partner, Kindern etc.)<br>in Ihrem Schlaf gestört werden oder aufwachen?                  | <input type="radio"/>               | <input type="radio"/>                                 | <input type="radio"/>         | <input type="radio"/> | 3406                  |                       |      |
| 3.5 | Wie oft haben Sie während der letzten vier Wochen vom Arzt verschriebene (rezeptpflichtige) Schlafmittel eingenommen?                  |                                     |                                                       |                               |                       |                       |                       |      |
|     | <input type="radio"/> gar nie                                                                                                          |                                     | <input type="radio"/> weniger als einmal pro Woche    |                               |                       | 3501                  |                       |      |
|     | <input type="radio"/> einmal oder zweimal pro Woche                                                                                    |                                     | <input type="radio"/> dreimal oder häufiger pro Woche |                               |                       |                       |                       |      |
| 3.6 | In welcher Stellung hielten Sie in den letzten drei Monaten nachts Ihr Schlafzimmerfenster mehrheitlich?                               |                                     |                                                       |                               |                       |                       |                       |      |
|     | <input type="radio"/> zu                                                                                                               | <input type="radio"/> ganz geöffnet | <input type="radio"/> halb geöffnet/angelehnt         |                               |                       | 3601                  |                       |      |
|     | Falls das Fenster offen oder halboffen war, warum?                                                                                     | <input type="radio"/> Frischluft    | <input type="radio"/> Abkühlung                       | <input type="radio"/> anderes |                       | 3602                  |                       |      |
|     | Falls das Fenster zu war, warum?                                                                                                       | <input type="radio"/> Lärm          | <input type="radio"/> Wärmeverlust                    | <input type="radio"/> anderes |                       | 3603                  |                       |      |
| 3.7 | Wie oft ergreifen Sie zum Schlafen folgende Massnahmen gegen Störungen durch Verkehrslärm (d.h. Strassen-, Eisenbahn-, oder Fluglärm)? | nie                                 | selten                                                | manch-<br>mal                 | oft                   | sehr<br>oft           | ständig               |      |
|     | ▪ Tragen von Ohrstöpseln/Oropax                                                                                                        | <input type="radio"/>               | <input type="radio"/>                                 | <input type="radio"/>         | <input type="radio"/> | <input type="radio"/> | <input type="radio"/> | 3701 |
|     | ▪ Schliessen der Fenster                                                                                                               | <input type="radio"/>               | <input type="radio"/>                                 | <input type="radio"/>         | <input type="radio"/> | <input type="radio"/> | <input type="radio"/> | 3702 |
|     | ▪ Änderung der Schlafenszeiten                                                                                                         | <input type="radio"/>               | <input type="radio"/>                                 | <input type="radio"/>         | <input type="radio"/> | <input type="radio"/> | <input type="radio"/> | 3703 |
|     | ▪ anderswo schlafen / Zimmer wechseln                                                                                                  | <input type="radio"/>               | <input type="radio"/>                                 | <input type="radio"/>         | <input type="radio"/> | <input type="radio"/> | <input type="radio"/> | 3704 |
|     | ▪ Einnahme von Schlaf-/Beruhigungsmitteln                                                                                              | <input type="radio"/>               | <input type="radio"/>                                 | <input type="radio"/>         | <input type="radio"/> | <input type="radio"/> | <input type="radio"/> | 3705 |
|     | ▪ Einnahme von Alkohol                                                                                                                 | <input type="radio"/>               | <input type="radio"/>                                 | <input type="radio"/>         | <input type="radio"/> | <input type="radio"/> | <input type="radio"/> | 3706 |
|     | ▪ Etwas essen/knabbern                                                                                                                 | <input type="radio"/>               | <input type="radio"/>                                 | <input type="radio"/>         | <input type="radio"/> | <input type="radio"/> | <input type="radio"/> | 3707 |
|     | ▪ Lesen, Fernsehen, Musik hören, Handy...                                                                                              | <input type="radio"/>               | <input type="radio"/>                                 | <input type="radio"/>         | <input type="radio"/> | <input type="radio"/> | <input type="radio"/> | 3708 |

## 4. Verhaltensweisen und Persönlichkeit

|     |                                                                                                                                                                                                                                                                                                            |                       |   |   |   |   |   |                        |      |
|-----|------------------------------------------------------------------------------------------------------------------------------------------------------------------------------------------------------------------------------------------------------------------------------------------------------------|-----------------------|---|---|---|---|---|------------------------|------|
| 4.1 | Im Folgenden finden Sie eine Reihe von Feststellungen. Bitte lesen Sie jede Feststellung genau durch und geben Sie an, wie sehr die Aussagen im Allgemeinen auf Sie zutreffen, d.h. wie sehr Ihr übliches Denken und Handeln durch diese Aussagen beschrieben wird.<br>(bitte die passende Zahl umkreisen) | stimme<br>nicht<br>zu |   |   |   |   |   | stimme<br>völlig<br>zu |      |
|     | ▪ Wenn ich Pläne habe, verfolge ich sie auch                                                                                                                                                                                                                                                               | 1                     | 2 | 3 | 4 | 5 | 6 | 7                      | 4101 |
|     | ▪ Normalerweise schaffe ich alles irgendwie                                                                                                                                                                                                                                                                | 1                     | 2 | 3 | 4 | 5 | 6 | 7                      | 4102 |
|     | ▪ Es ist mir wichtig, an vielen Dingen interessiert zu bleiben                                                                                                                                                                                                                                             | 1                     | 2 | 3 | 4 | 5 | 6 | 7                      | 4103 |
|     | ▪ Ich kann mehrere Dinge gleichzeitig bewältigen                                                                                                                                                                                                                                                           | 1                     | 2 | 3 | 4 | 5 | 6 | 7                      | 4104 |
|     | ▪ Ich bin entschlossen                                                                                                                                                                                                                                                                                     | 1                     | 2 | 3 | 4 | 5 | 6 | 7                      | 4105 |
|     | ▪ Ich behalte an vielen Dingen Interesse                                                                                                                                                                                                                                                                   | 1                     | 2 | 3 | 4 | 5 | 6 | 7                      | 4106 |
|     | ▪ Ich finde öfter etwas, worüber ich lachen kann                                                                                                                                                                                                                                                           | 1                     | 2 | 3 | 4 | 5 | 6 | 7                      | 4107 |
|     | ▪ Normalerweise kann ich eine Situation aus mehreren Perspektiven betrachten                                                                                                                                                                                                                               | 1                     | 2 | 3 | 4 | 5 | 6 | 7                      | 4108 |
|     | ▪ Ich kann mich auch überwinden, Dinge zu tun, die ich eigentlich nicht machen will                                                                                                                                                                                                                        | 1                     | 2 | 3 | 4 | 5 | 6 | 7                      | 4109 |
|     | ▪ In mir steckt genügend Energie, um alles zu machen, was ich machen muss                                                                                                                                                                                                                                  | 1                     | 2 | 3 | 4 | 5 | 6 | 7                      | 4110 |

## Fragebogen zur SiRENE-Studie

|     |                                                                                                                                                                                                                                                                                                                                                                                                                                                                                                                                                                                                                                                                                                                                                                                                                                                                                                                                                                                                                                                                                                                                                                                                                                                                                                                                                                                                                                                                                                                                                                                                                                                                                                                                                                                                                                                                                                                                                                                                                                                                                                                                                                                                                                                                                                                                                                                                                                                                                                                                                                                                                                                                                                                                                                                                                                                                                                                                                                                                                                                                                                                                                                                                                                                                                                                                                                                                                                                                                                                                                                                                                                                                                                                                                                                                                                                                                                                                                                                                                                                                                                                                                                                                                                                                                                                                                                                                                                                                                                                                                                                                                                                                                                 |                  |
|-----|-------------------------------------------------------------------------------------------------------------------------------------------------------------------------------------------------------------------------------------------------------------------------------------------------------------------------------------------------------------------------------------------------------------------------------------------------------------------------------------------------------------------------------------------------------------------------------------------------------------------------------------------------------------------------------------------------------------------------------------------------------------------------------------------------------------------------------------------------------------------------------------------------------------------------------------------------------------------------------------------------------------------------------------------------------------------------------------------------------------------------------------------------------------------------------------------------------------------------------------------------------------------------------------------------------------------------------------------------------------------------------------------------------------------------------------------------------------------------------------------------------------------------------------------------------------------------------------------------------------------------------------------------------------------------------------------------------------------------------------------------------------------------------------------------------------------------------------------------------------------------------------------------------------------------------------------------------------------------------------------------------------------------------------------------------------------------------------------------------------------------------------------------------------------------------------------------------------------------------------------------------------------------------------------------------------------------------------------------------------------------------------------------------------------------------------------------------------------------------------------------------------------------------------------------------------------------------------------------------------------------------------------------------------------------------------------------------------------------------------------------------------------------------------------------------------------------------------------------------------------------------------------------------------------------------------------------------------------------------------------------------------------------------------------------------------------------------------------------------------------------------------------------------------------------------------------------------------------------------------------------------------------------------------------------------------------------------------------------------------------------------------------------------------------------------------------------------------------------------------------------------------------------------------------------------------------------------------------------------------------------------------------------------------------------------------------------------------------------------------------------------------------------------------------------------------------------------------------------------------------------------------------------------------------------------------------------------------------------------------------------------------------------------------------------------------------------------------------------------------------------------------------------------------------------------------------------------------------------------------------------------------------------------------------------------------------------------------------------------------------------------------------------------------------------------------------------------------------------------------------------------------------------------------------------------------------------------------------------------------------------------------------------------------------------------------------------|------------------|
| 4.2 | <p>Wie würden Sie Ihre Fähigkeit mit Stress umzugehen auf einer Skala von 1 bis 6 beurteilen?<br/>(1 = Ich kann Stress von mir abschütteln, 6 = Stress nagt an mir)</p> <div style="text-align: center;">             1      2      3      4      5      6<br/> <input type="radio"/>   <input type="radio"/>   <input type="radio"/>   <input type="radio"/>   <input type="radio"/>   <input type="radio"/> </div> <p>und wie hoch würden Sie das Ausmass an Stress in Ihrem Leben <u>im letzten Jahr</u> beurteilen<br/>(zu Hause und bei der Arbeit)? (1 = keinen Stress, 6 = extremer Stress)</p> <div style="text-align: center;">             1      2      3      4      5      6<br/> <input type="radio"/>   <input type="radio"/>   <input type="radio"/>   <input type="radio"/>   <input type="radio"/>   <input type="radio"/> </div>                                                                                                                                                                                                                                                                                                                                                                                                                                                                                                                                                                                                                                                                                                                                                                                                                                                                                                                                                                                                                                                                                                                                                                                                                                                                                                                                                                                                                                                                                                                                                                                                                                                                                                                                                                                                                                                                                                                                                                                                                                                                                                                                                                                                                                                                                                                                                                                                                                                                                                                                                                                                                                                                                                                                                                                                                                                                                                                                                                                                                                                                                                                                                                                                                                                                                                                                                                                                                                                                                                                                                                                                                                                                                                                                                                                                                                             | 4201<br><br>4202 |
| 4.3 | <p>Beurteilen Sie bitte, inwiefern die folgenden Aussagen auf Ihr Denken und Handeln in vergangenen <u>unangenehmen oder schwierigen Situationen</u> zutreffen. Bitte machen Sie für jede Aussage eine Angabe.</p> <div style="text-align: center; margin-bottom: 10px;">             überhaupt    ein<br/>             nicht    bisschen    ziemlich    sehr         </div> <div style="display: flex; justify-content: space-between;"> <div style="width: 85%;"> <ul style="list-style-type: none"> <li>▪ Ich habe mich mit Arbeit oder anderen Sachen beschäftigt, um auf andere Gedanken zu kommen _____ <input type="radio"/> _____ <input type="radio"/> _____ <input type="radio"/> _____ <input type="radio"/></li> <li>▪ Ich habe mich darauf konzentriert, etwas an meiner Situation zu verändern _____ <input type="radio"/> _____ <input type="radio"/> _____ <input type="radio"/> _____ <input type="radio"/></li> <li>▪ Ich habe mir eingeredet, dass das alles nicht wahr ist _____ <input type="radio"/> _____ <input type="radio"/> _____ <input type="radio"/> _____ <input type="radio"/></li> <li>▪ Ich habe aufmunternde Unterstützung von anderen erhalten _____ <input type="radio"/> _____ <input type="radio"/> _____ <input type="radio"/> _____ <input type="radio"/></li> <li>▪ Ich habe es aufgegeben, mich damit zu beschäftigen _____ <input type="radio"/> _____ <input type="radio"/> _____ <input type="radio"/> _____ <input type="radio"/></li> <li>▪ Ich habe aktiv gehandelt, um die Situation zu verbessern _____ <input type="radio"/> _____ <input type="radio"/> _____ <input type="radio"/> _____ <input type="radio"/></li> <li>▪ Ich wollte einfach nicht glauben, dass mir das passiert _____ <input type="radio"/> _____ <input type="radio"/> _____ <input type="radio"/> _____ <input type="radio"/></li> <li>▪ Ich habe meinen Gefühlen freien Lauf gelassen _____ <input type="radio"/> _____ <input type="radio"/> _____ <input type="radio"/> _____ <input type="radio"/></li> <li>▪ Ich habe andere Menschen um Hilfe und Rat gebeten _____ <input type="radio"/> _____ <input type="radio"/> _____ <input type="radio"/> _____ <input type="radio"/></li> <li>▪ Ich habe versucht, die Dinge von einer positiveren Seite zu betrachten _____ <input type="radio"/> _____ <input type="radio"/> _____ <input type="radio"/> _____ <input type="radio"/></li> <li>▪ Ich habe versucht, mir einen Plan zu überlegen, was ich tun kann _____ <input type="radio"/> _____ <input type="radio"/> _____ <input type="radio"/> _____ <input type="radio"/></li> <li>▪ Jemand hat mich getröstet und mir Verständnis entgegengebracht _____ <input type="radio"/> _____ <input type="radio"/> _____ <input type="radio"/> _____ <input type="radio"/></li> <li>▪ Ich habe gar nicht mehr versucht, die Situation in den Griff zu kriegen _____ <input type="radio"/> _____ <input type="radio"/> _____ <input type="radio"/> _____ <input type="radio"/></li> <li>▪ Ich habe versucht, etwas Gutes in dem zu finden, was mir passiert ist _____ <input type="radio"/> _____ <input type="radio"/> _____ <input type="radio"/> _____ <input type="radio"/></li> <li>▪ Ich habe etwas unternommen, um mich abzulenken _____ <input type="radio"/> _____ <input type="radio"/> _____ <input type="radio"/> _____ <input type="radio"/></li> <li>▪ Ich habe mich damit abgefunden, dass es passiert ist _____ <input type="radio"/> _____ <input type="radio"/> _____ <input type="radio"/> _____ <input type="radio"/></li> <li>▪ Ich habe offen gezeigt, wie schlecht ich mich fühle _____ <input type="radio"/> _____ <input type="radio"/> _____ <input type="radio"/> _____ <input type="radio"/></li> <li>▪ Ich habe versucht, von anderen Menschen Rat oder Hilfe einzuholen _____ <input type="radio"/> _____ <input type="radio"/> _____ <input type="radio"/> _____ <input type="radio"/></li> <li>▪ Ich habe gelernt, damit zu leben _____ <input type="radio"/> _____ <input type="radio"/> _____ <input type="radio"/> _____ <input type="radio"/></li> <li>▪ Ich habe mir viele Gedanken darüber gemacht, was hier das Richtige wäre _____ <input type="radio"/> _____ <input type="radio"/> _____ <input type="radio"/> _____ <input type="radio"/></li> </ul> </div> <div style="width: 10%; text-align: center;">             4301<br/><br/>4302<br/><br/>4303<br/><br/>4304<br/><br/>4305<br/><br/>4306<br/><br/>4307<br/><br/>4308<br/><br/>4309<br/><br/>4310<br/><br/>4311<br/><br/>4312<br/><br/>4313<br/><br/>4314<br/><br/>4315<br/><br/>4316<br/><br/>4317<br/><br/>4318<br/><br/>4319<br/><br/>4320         </div> </div> |                  |
| 4.4 | <p>Die folgenden Aussagen können mehr oder weniger auf Sie zutreffen. Bitte geben Sie bei jeder Aussage an, inwieweit diese auf Sie persönlich zutrifft.</p> <div style="text-align: center; margin-bottom: 10px;">             trifft    trifft    trifft    trifft    trifft voll<br/>             gar nicht    wenig    etwas    ziemlich    und ganz<br/>             zu    zu    zu    zu    zu         </div> <div style="display: flex; justify-content: space-between;"> <div style="width: 85%;"> <ul style="list-style-type: none"> <li>▪ Ich habe mein Leben selbst in der Hand _____ <input type="radio"/> _____ <input type="radio"/> _____ <input type="radio"/> _____ <input type="radio"/></li> <li>▪ Wenn ich mich anstrengte, werde ich auch Erfolg haben _____ <input type="radio"/> _____ <input type="radio"/> _____ <input type="radio"/> _____ <input type="radio"/></li> </ul> </div> <div style="width: 10%; text-align: center;">             4401<br/><br/>4402         </div> </div>                                                                                                                                                                                                                                                                                                                                                                                                                                                                                                                                                                                                                                                                                                                                                                                                                                                                                                                                                                                                                                                                                                                                                                                                                                                                                                                                                                                                                                                                                                                                                                                                                                                                                                                                                                                                                                                                                                                                                                                                                                                                                                                                                                                                                                                                                                                                                                                                                                                                                                                                                                                                                                                                                                                                                                                                                                                                                                                                                                                                                                                                                                                                                                                                                                                                                                                                                                                                                                                                                                                                                                                                                                                                                |                  |

## Fragebogen zur SiRENE-Studie

| (Forts.)                                                                              | trifft<br>gar nicht<br>zu | trifft<br>wenig<br>zu | trifft<br>etwas<br>zu | trifft<br>ziemlich<br>zu | trifft voll<br>und ganz<br>zu |      |
|---------------------------------------------------------------------------------------|---------------------------|-----------------------|-----------------------|--------------------------|-------------------------------|------|
| ▪ Egal ob privat oder im Beruf: Mein Leben wird zum grossen Teil von anderen bestimmt | <input type="radio"/>     | <input type="radio"/> | <input type="radio"/> | <input type="radio"/>    | <input type="radio"/>         | 4403 |
| ▪ Meine Pläne werden oft vom Schicksal durchkreuzt                                    | <input type="radio"/>     | <input type="radio"/> | <input type="radio"/> | <input type="radio"/>    | <input type="radio"/>         | 4404 |

### 5. Gesundheit und Gesundheitsverhalten

|     |                                                                                                                                                                                                                                 |                                |        |
|-----|---------------------------------------------------------------------------------------------------------------------------------------------------------------------------------------------------------------------------------|--------------------------------|--------|
| 5.1 | Wie gross sind Sie? ..... cm.                                                                                                                                                                                                   | Wie schwer sind Sie? ..... kg. | 5101/2 |
| 5.2 | Wie gut ist Ihr Gesundheitszustand im Allgemeinen?                                                                                                                                                                              |                                |        |
|     | <input type="radio"/> sehr gut <input type="radio"/> gut <input type="radio"/> mittelmässig <input type="radio"/> schlecht <input type="radio"/> sehr schlecht                                                                  |                                | 5201   |
|     | Wurde bei Ihnen jemals durch einen Arzt Diabetes diagnostiziert?                                                                                                                                                                |                                | 5202   |
|     | <input type="radio"/> ja <input type="radio"/> nein                                                                                                                                                                             |                                |        |
|     | Wurde bei Ihnen jemals durch einen Arzt Bluthochdruck diagnostiziert?                                                                                                                                                           |                                | 5203   |
|     | <input type="radio"/> ja <input type="radio"/> nein                                                                                                                                                                             |                                |        |
|     | Haben Sie Probleme mit dem Gehör? <input type="radio"/> ja (→ <input type="radio"/> ich trage ein Hörgerät) <input type="radio"/> nein                                                                                          |                                | 5204   |
| 5.3 | In den folgenden Fragen geht es darum, wie Sie sich fühlen und wie es Ihnen <u>in den vergangenen 4 Wochen</u> gegangen ist. Bitte kreuzen Sie in jeder Zeile die Antwort an, die Ihrem Befinden am ehesten entspricht.         |                                |        |
|     | Wie oft waren Sie in den vergangenen 4 Wochen...                                                                                                                                                                                |                                |        |
|     | <div style="text-align: center;">             nie      selten      <b>ziemlich</b> oft      meistens      immer           </div>                                                                                                |                                |        |
|     | ▪ sehr nervös? _____ <input type="radio"/>                                                                      |                                | 5301   |
|     | ▪ so niedergeschlagen, dass Sie nichts aufheuern konnte? _____ <input type="radio"/>                            |                                | 5302   |
|     | ▪ ruhig und gelassen? _____ <input type="radio"/>                                                               |                                | 5303   |
|     | ▪ entmutigt und traurig? _____ <input type="radio"/>                                                            |                                | 5304   |
|     | ▪ glücklich? _____ <input type="radio"/>                                                                        |                                | 5305   |
| 5.4 | Im folgenden Fragenblock geht es um Aspekte Ihres Gesundheitsverhaltens und um körperliche Aktivitäten.                                                                                                                         |                                |        |
|     | Rauchen Sie zurzeit (d.h. im letzten Monat) Zigaretten?                                                                                                                                                                         |                                |        |
|     | <input type="radio"/> Ja (→ Ich rauche im Durchschnitt ..... Zigaretten pro Tag)                                                                                                                                                |                                | 5401/2 |
|     | <input type="radio"/> Nein (→ <input type="radio"/> ich habe früher geraucht, aber schon seit ..... Jahren nicht mehr)                                                                                                          |                                | 5403   |
|     | <input type="radio"/> Ich habe nie geraucht                                                                                                                                                                                     |                                |        |
|     | Wie viele Stunden und Minuten <u>in der letzten Woche</u> sind Sie in Ihrer Freizeit durch körperliche Betätigung ins Schwitzen gekommen (z.B. durch Rennen/Velofahren usw.)?                                                   |                                |        |
|     | ___ Stunden und ___ Minuten <b>in der letzten Woche</b>                                                                                                                                                                         |                                | 5404   |
|     | Wie lange haben Sie sich <u>in der letzten Woche</u> körperlich so bewegt, dass sie zumindest ein bisschen ausser Atem gekommen sind (z.B. durch zügiges Laufen, Wandern, Tanzen, Gartenarbeiten oder verschiedene Sportarten)? |                                |        |
|     | ___ Stunden und ___ Minuten <b>in der letzten Woche</b>                                                                                                                                                                         |                                | 5405   |

## 6. Erwerbssituation und Beruf

|                                                                                                                                                                                                                                                                                                                                                                                                                                                                                                                                                                                                                                                                                                                                                                                                                                                                                                                                                                                                                                                                                                                                                                              |                              |
|------------------------------------------------------------------------------------------------------------------------------------------------------------------------------------------------------------------------------------------------------------------------------------------------------------------------------------------------------------------------------------------------------------------------------------------------------------------------------------------------------------------------------------------------------------------------------------------------------------------------------------------------------------------------------------------------------------------------------------------------------------------------------------------------------------------------------------------------------------------------------------------------------------------------------------------------------------------------------------------------------------------------------------------------------------------------------------------------------------------------------------------------------------------------------|------------------------------|
| <p>6.1 Im Folgenden hätten wir gerne einige Auskünfte über Ihre Erwerbssituation, Ausbildung und Beruf. Sind sie zurzeit erwerbstätig?</p> <p> <input type="radio"/> ja, Vollzeit    <input type="radio"/> ja, Teilzeit .....%    <input type="radio"/> in Ausbildung (Schule, Studium, Lehre)<br/> <input type="radio"/> nicht erwerbstätig, aber auf Stellensuche    <input type="radio"/> Rentner/in, pensioniert<br/> <input type="radio"/> nicht erwerbstätig und nicht auf Stellensuche    <input type="radio"/> anderes<br/> (z.B. Hausfrau/Hausmann) </p> <p>Falls Sie erwerbstätig sind, welchen Beruf üben Sie im Moment aus? (möglichst genau)</p> <p>.....</p>                                                                                                                                                                                                                                                                                                                                                                                                                                                                                                   | 6101<br>6102<br><br><br>6103 |
| <p>6.2 Welchen Beruf hat Ihr Vater bzw. Ihre Mutter ausgeübt als Sie noch ein Kind waren?</p> <p>Beruf des Vaters: ..... Beruf der Mutter: .....</p>                                                                                                                                                                                                                                                                                                                                                                                                                                                                                                                                                                                                                                                                                                                                                                                                                                                                                                                                                                                                                         | 6201<br>6202                 |
| <p>6.3 Welches ist Ihre höchste abgeschlossene Ausbildung?</p> <p> <input type="radio"/> Primarschule<br/> <input type="radio"/> Obligatorische Schule: 9 Jahre (Real-, Sekundar-, Bezirksschule etc.)<br/> <input type="radio"/> Übergansausbildungen: Vorlehre, 10. Schuljahr, Berufswahlschule, Haushaltslehrjahr etc.<br/> <input type="radio"/> Diplommittelschule DMS, Fachmittelschule FMS o.ä.<br/> <input type="radio"/> Berufslehre mit Fähigkeitszeugnis/Berufsattest oder Vollzeitberufsschule<br/> <input type="radio"/> Berufs- oder Fach-Maturität<br/> <input type="radio"/> Gymnasiale Maturität, Lehrer/innen-Seminar, Erwachsenen-Maturität<br/> <input type="radio"/> Höhere Berufsbildung mit Fachausweis, Meisterdiplom oder äquivalente Ausbildung<br/> <input type="radio"/> Höhere Fachschule (HF) für Technik, Technikerschule, HF für Wirtschaft (bzw. HKG)<br/> <input type="radio"/> Ingenieurschule HTL, Höhere Fachschule HWV, HFG, HFS o.ä.<br/> <input type="radio"/> Bachelor (Universität, ETH, FH, PH)<br/> <input type="radio"/> Master, Lizentiat, Diplom (Universität, ETH, FH, PH)<br/> <input type="radio"/> Doktorat, PhD, MD </p> | 6301                         |

Vielen Dank! Die Befragung ist fast zu Ende. Bitte beantworten Sie noch folgende Fragen:

|                                                                                                                                                                                                                                                |    |
|------------------------------------------------------------------------------------------------------------------------------------------------------------------------------------------------------------------------------------------------|----|
| <p> Möchten Sie an der Verlosung von drei Apple iPad mini Retina teilnehmen?</p> <p><input type="radio"/> ja    <input type="radio"/> nein</p>              | P1 |
| <p>Wären Sie allenfalls daran interessiert, an einer der folgenden wissenschaftlichen Studien als freiwillige (aber bezahlte) Versuchsperson teilzunehmen?</p>                                                                                 |    |
| <p> <input type="radio"/> ja, Schlaflabor-Versuch im Zentrum für Chronobiologie an der Universität Basel<br/> <input type="radio"/> ja, Lärm-Messungen bei mir zuhause    <input type="radio"/> nein </p>                                      | P2 |
|                                                                                                                                                                                                                                                | P3 |
| <p>Dürfen wir Sie ggf. in Zukunft für eine weitere Befragung erneut anfragen?</p> <p><input type="radio"/> ja    <input type="radio"/> nein</p>                                                                                                | P4 |
| <p>Falls Sie eine oder mehrere der Fragen mit "ja" beantwortet haben, geben Sie uns bitte Ihren Namen sowie Ihre Postadresse, oder Ihre E-Mail-Adresse oder Telefonnummer an, damit wir Sie kontaktieren können:</p> <p>.....</p> <p>.....</p> | P5 |

## Fragebogen zur SiRENE-Studie

Rücksendeadresse:

Bundesamt für Umwelt BAFU  
Abt. Lärm und NIS  
SiRENE-Studie / BMK  
3003 Bern

Fax: 058 462 17 57  
Email: [mark.brink@bafu.admin.ch](mailto:mark.brink@bafu.admin.ch)

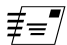

Benutzen Sie bitte das adressierte und vorfrankierte Rückantwortcouvert.

Hier ist Platz für Bemerkungen und Kommentare:





# Questionnaire de l'étude SiRENE

Le présent questionnaire est subdivisé en six parties : «Informations sur la personne et les conditions d'habitation», «Gêne et perturbations dues au bruit», «Emploi du temps, sommeil et qualité du sommeil», «Comportements et personnalité», «Santé en général et comportement en matière de santé», «Profession et situation professionnelle». Il est important que vous répondiez autant que possible à toutes les questions, même si l'une ou l'autre peut sembler n'avoir rien à faire avec le bruit. D'avance merci !

Pour les questions où vous avez le choix entre plusieurs réponses, veuillez cocher la case (○) qui correspond le mieux dans votre cas. Si plusieurs réponses sont possibles, veuillez cocher toutes les cases pertinentes. Lorsque vous trouvez une ligne pointillée (.....) ou un soulignement (\_\_\_\_), vous pouvez insérer des mots ou des chiffres. Lorsque des chiffres sont proposés (1 2 3...), entourez le chiffre qui convient le mieux.

## 1. Informations sur la personne et les conditions d'habitation

|     |                                                                                                                                                                                                                                                                                                                                                                                                                                                     |                      |
|-----|-----------------------------------------------------------------------------------------------------------------------------------------------------------------------------------------------------------------------------------------------------------------------------------------------------------------------------------------------------------------------------------------------------------------------------------------------------|----------------------|
| 1.1 | Date : .....                                                                                                                                                                                                                                                                                                                                                                                                                                        | 1101                 |
| 1.2 | Année de naissance : ..... Sexe : <input type="radio"/> F <input type="radio"/> M                                                                                                                                                                                                                                                                                                                                                                   | 1201/2               |
| 1.3 | L'adresse sur la lettre est-elle votre lieu de résidence principale ? <input type="radio"/> oui <input type="radio"/> non                                                                                                                                                                                                                                                                                                                           | 1301                 |
| 1.4 | Depuis combien de temps habitez-vous dans votre appartement/maison actuel ? ..... années                                                                                                                                                                                                                                                                                                                                                            | 1401                 |
|     | Quel est l'âge de la maison où vous habitez ? ..... annés <input type="radio"/> ne sais pas                                                                                                                                                                                                                                                                                                                                                         | 1402                 |
| 1.5 | Habitez-vous : <input type="radio"/> seul/e <input type="radio"/> en couple <input type="radio"/> en collocation <input type="radio"/> autres ( <input type="radio"/> avec enfant/s)                                                                                                                                                                                                                                                                | 1501                 |
|     | Combien de personnes au total, vous compris-e (enfants compris) vivent dans votre ménage ? ..... personnes                                                                                                                                                                                                                                                                                                                                          | 1502                 |
| 1.6 | Dans quel type d'appart./maison vivez-vous ?<br><input type="radio"/> Maison individuelle / jumelée / mitoyenne<br><input type="radio"/> Appartement au rez-de chaussée<br><input type="radio"/> Appartement au ..... étage                                                                                                                                                                                                                         | 1601<br>1602         |
|     | Possédez-vous dans votre appartement...<br><input type="checkbox"/> Fenêtres antibruits ? <input type="radio"/> oui <input type="radio"/> non <input type="radio"/> sais pas<br><input type="checkbox"/> Aérateurs insonorisés ? <input type="radio"/> oui <input type="radio"/> non <input type="radio"/> sais pas<br><input type="checkbox"/> Aération douce ? <input type="radio"/> oui <input type="radio"/> non <input type="radio"/> sais pas | 1603<br>1604<br>1605 |
|     | Êtes-vous (co)propriétaire ou locataire de votre appartement/maison ?<br><input type="radio"/> Propriétaire <input type="radio"/> Copropriétaire <input type="radio"/> Sociétaire <input type="radio"/> Locataire                                                                                                                                                                                                                                   | 1606                 |
| 1.7 | Comment votre chambre à coucher est-elle orientée par rapport à la route la plus proche ?<br><input type="radio"/> à l'opposé de la route ou vers une cour intérieure <input type="radio"/> latéralement à l'axe routier<br><input type="radio"/> donne sur la route                                                                                                                                                                                | 1701                 |
|     | Si votre chambre à coucher donne sur la route, quel est le nom de celle-ci ?<br><br>Nom de la route : .....                                                                                                                                                                                                                                                                                                                                         | 1702                 |

## 2. Gêne et perturbations dues au bruit

|     |                                                                                                                                                                                                      |  |
|-----|------------------------------------------------------------------------------------------------------------------------------------------------------------------------------------------------------|--|
| 2.1 | Si vous repensez aux douze derniers mois chez vous, à quel point avez-vous été gêné-e ou dérangé-e par le bruit des routes, du chemin de fer ou du trafic aérien ? <input type="radio"/> tourner svp |  |
|-----|------------------------------------------------------------------------------------------------------------------------------------------------------------------------------------------------------|--|

## Questionnaire de l'étude SiRENE

|                                                                                                                                                                                                                                                                     |                                                                          |                       |                       |                       |                       |                       |        |
|---------------------------------------------------------------------------------------------------------------------------------------------------------------------------------------------------------------------------------------------------------------------|--------------------------------------------------------------------------|-----------------------|-----------------------|-----------------------|-----------------------|-----------------------|--------|
| (suite)                                                                                                                                                                                                                                                             |                                                                          | pas du tout           | légèrement            | moyennement           | fortement             | extrêmement           |        |
| Bruit routier                                                                                                                                                                                                                                                       | <input type="radio"/>                                                    | <input type="radio"/> | <input type="radio"/> | <input type="radio"/> | <input type="radio"/> | <input type="radio"/> | 2101   |
| Bruit ferroviaire                                                                                                                                                                                                                                                   | <input type="radio"/>                                                    | <input type="radio"/> | <input type="radio"/> | <input type="radio"/> | <input type="radio"/> | <input type="radio"/> | 2102   |
| Bruit du trafic aérien                                                                                                                                                                                                                                              | <input type="radio"/>                                                    | <input type="radio"/> | <input type="radio"/> | <input type="radio"/> | <input type="radio"/> | <input type="radio"/> | 2103   |
| 2.2 Si vous repensez aux douze derniers mois chez vous, quel chiffre entre 0 et 10 exprime le mieux la gêne ou le dérangement que vous a causé globalement le bruit de la route, du chemin de fer ou du trafic aérien ? (veuillez entourer le chiffre qui convient) |                                                                          |                       |                       |                       |                       |                       |        |
| Bruit routier                                                                                                                                                                                                                                                       |                                                                          |                       |                       |                       |                       |                       | 2201   |
| Bruit ferroviaire                                                                                                                                                                                                                                                   |                                                                          |                       |                       |                       |                       |                       | 2202   |
| Bruit du trafic aérien                                                                                                                                                                                                                                              |                                                                          |                       |                       |                       |                       |                       | 2203   |
| 2.3 Le bruit de la <u>route</u> vous gêne-t-il ou vous dérange-t-il spécialement pendant <u>certaines heures</u> (du jour ou de la nuit) ?                                                                                                                          |                                                                          |                       |                       |                       |                       |                       |        |
| <input type="radio"/> non                                                                                                                                                                                                                                           | <input type="radio"/> oui, de _____ h _____ à _____ h _____              |                       |                       |                       |                       |                       | 2301   |
|                                                                                                                                                                                                                                                                     | et de _____ h _____ à _____ h _____                                      |                       |                       |                       |                       |                       | 2302   |
|                                                                                                                                                                                                                                                                     | et de _____ h _____ à _____ h _____                                      |                       |                       |                       |                       |                       | 2303   |
| 2.4 Le bruit des <u>chemins de fer</u> vous gêne-t-il ou vous dérange-t-il spécialement pendant <u>certaines heures</u> (du jour ou de la nuit) ?                                                                                                                   |                                                                          |                       |                       |                       |                       |                       |        |
| <input type="radio"/> non                                                                                                                                                                                                                                           | <input type="radio"/> oui, de _____ h _____ à _____ h _____              |                       |                       |                       |                       |                       | 2401   |
|                                                                                                                                                                                                                                                                     | et de _____ h _____ à _____ h _____                                      |                       |                       |                       |                       |                       | 2402   |
|                                                                                                                                                                                                                                                                     | et de _____ h _____ à _____ h _____                                      |                       |                       |                       |                       |                       | 2403   |
| 2.5 Le bruit du <u>trafic aérien</u> vous gêne-t-il ou vous dérange-t-il spécialement pendant <u>certaines heures</u> (du jour ou de la nuit) ?                                                                                                                     |                                                                          |                       |                       |                       |                       |                       |        |
| <input type="radio"/> non                                                                                                                                                                                                                                           | <input type="radio"/> oui, de _____ h _____ à _____ h _____              |                       |                       |                       |                       |                       | 2501   |
|                                                                                                                                                                                                                                                                     | et de _____ h _____ à _____ h _____                                      |                       |                       |                       |                       |                       | 2502   |
|                                                                                                                                                                                                                                                                     | et de _____ h _____ à _____ h _____                                      |                       |                       |                       |                       |                       | 2503   |
| 2.6 Si vous repensez aux douze derniers mois chez vous, dans quelle mesure le bruit de la route, du chemin de fer ou du trafic aérien vous a-t-il gêné ou dérangé <u>durant la nuit, lorsque vous vouliez dormir</u> ?                                              |                                                                          |                       |                       |                       |                       |                       |        |
|                                                                                                                                                                                                                                                                     | pas du tout                                                              | légèrement            | moyennement           | fortement             | extrêmement           |                       |        |
| Bruit routier                                                                                                                                                                                                                                                       | <input type="radio"/>                                                    | <input type="radio"/> | <input type="radio"/> | <input type="radio"/> | <input type="radio"/> | <input type="radio"/> | 2601   |
| Bruit ferroviaire                                                                                                                                                                                                                                                   | <input type="radio"/>                                                    | <input type="radio"/> | <input type="radio"/> | <input type="radio"/> | <input type="radio"/> | <input type="radio"/> | 2602   |
| Bruit du trafic aérien                                                                                                                                                                                                                                              | <input type="radio"/>                                                    | <input type="radio"/> | <input type="radio"/> | <input type="radio"/> | <input type="radio"/> | <input type="radio"/> | 2603   |
| Bruit de voisinage                                                                                                                                                                                                                                                  | <input type="radio"/>                                                    | <input type="radio"/> | <input type="radio"/> | <input type="radio"/> | <input type="radio"/> | <input type="radio"/> | 2604   |
| Autres : .....                                                                                                                                                                                                                                                      | <input type="radio"/>                                                    | <input type="radio"/> | <input type="radio"/> | <input type="radio"/> | <input type="radio"/> | <input type="radio"/> | 2605/6 |
| 2.7 Globalement, quelle source de bruit vous a le plus gêné ou dérangé ces douze derniers mois dans le quartier où vous habitez ?                                                                                                                                   |                                                                          |                       |                       |                       |                       |                       |        |
| <input type="radio"/> Bruit routier                                                                                                                                                                                                                                 | <input type="radio"/> Bruit de l'industrie et de l'artisanat             |                       |                       |                       |                       |                       | 2701   |
| <input type="radio"/> Bruit ferroviaire                                                                                                                                                                                                                             | <input type="radio"/> Bruit des voisins                                  |                       |                       |                       |                       |                       |        |
| <input type="radio"/> Bruit du trafic aérien                                                                                                                                                                                                                        | <input type="radio"/> Bruit des bars/manifestations sports/loisirs, etc. |                       |                       |                       |                       |                       |        |
| <input type="radio"/> autre bruit, à savoir : .....                                                                                                                                                                                                                 |                                                                          |                       |                       |                       |                       |                       | 2702   |

|      |                                                                                                                                                                                                                                                                                                                                                                                                                                                                                                                                                                                                                                                                                                                                                                                                                                                                                                                                                                                                                                                                                                                                                                                                                                                                                                                                                                                                                                                                                                                                                                                                                                                                                                                                                                                                                                |                                                                                                                                                             |
|------|--------------------------------------------------------------------------------------------------------------------------------------------------------------------------------------------------------------------------------------------------------------------------------------------------------------------------------------------------------------------------------------------------------------------------------------------------------------------------------------------------------------------------------------------------------------------------------------------------------------------------------------------------------------------------------------------------------------------------------------------------------------------------------------------------------------------------------------------------------------------------------------------------------------------------------------------------------------------------------------------------------------------------------------------------------------------------------------------------------------------------------------------------------------------------------------------------------------------------------------------------------------------------------------------------------------------------------------------------------------------------------------------------------------------------------------------------------------------------------------------------------------------------------------------------------------------------------------------------------------------------------------------------------------------------------------------------------------------------------------------------------------------------------------------------------------------------------|-------------------------------------------------------------------------------------------------------------------------------------------------------------|
| 2.8  | Ici, il s'agit de déterminer votre sensibilité au bruit. Dans quelle mesure êtes-vous d'accord avec l'affirmation suivante ?                                                                                                                                                                                                                                                                                                                                                                                                                                                                                                                                                                                                                                                                                                                                                                                                                                                                                                                                                                                                                                                                                                                                                                                                                                                                                                                                                                                                                                                                                                                                                                                                                                                                                                   | 2801                                                                                                                                                        |
|      | <div style="display: flex; justify-content: space-between; width: 100%;"> <span><b>tout à fait d'accord</b></span> <span><b>pas du tout d'accord</b></span> </div> <div style="display: flex; justify-content: space-around; align-items: center;"> <input type="radio"/> <input type="radio"/> <input type="radio"/> <input type="radio"/> <input type="radio"/> <input type="radio"/> </div> <p>▪ Je suis sensible au bruit</p>                                                                                                                                                                                                                                                                                                                                                                                                                                                                                                                                                                                                                                                                                                                                                                                                                                                                                                                                                                                                                                                                                                                                                                                                                                                                                                                                                                                              |                                                                                                                                                             |
| 2.9  | Veuillez répondre aux treize questions qui suivent dans l'ordre. Imaginez-vous dans la situation et cochez la réponse qui vous correspond le mieux.                                                                                                                                                                                                                                                                                                                                                                                                                                                                                                                                                                                                                                                                                                                                                                                                                                                                                                                                                                                                                                                                                                                                                                                                                                                                                                                                                                                                                                                                                                                                                                                                                                                                            |                                                                                                                                                             |
|      | <div style="display: flex; justify-content: space-between; width: 100%;"> <span><b>tout à fait d'accord</b></span> <span><b>plutôt d'accord</b></span> <span><b>plutôt pas d'accord</b></span> <span><b>pas du tout d'accord</b></span> </div> <div style="display: flex; justify-content: space-around; align-items: center;"> <input type="radio"/> <input type="radio"/> <input type="radio"/> <input type="radio"/> </div> <p>▪ J'ai besoin d'un environnement complètement calme pour avoir une bonne nuit de sommeil _____ <input type="radio"/></p> <p>▪ J'ai besoin d'un environnement calme pour être capable d'effectuer de nouvelles tâches _____ <input type="radio"/></p> <p>▪ Quand je suis à la maison, je m'habitue rapidement au bruit _____ <input type="radio"/></p> <p>▪ Je deviens très agité-e si j'entends quelqu'un parler alors que j'essaie de m'endormir _____ <input type="radio"/></p> <p>▪ Je suis très sensible au bruit de voisinage _____ <input type="radio"/></p> <p>▪ Lorsque les gens autour de moi sont bruyants, j'ai du mal à accomplir mon travail _____ <input type="radio"/></p> <p>▪ Je suis sensible au bruit _____ <input type="radio"/></p> <p>▪ Je suis nettement moins performant-e dans les endroits bruyants _____ <input type="radio"/></p> <p>▪ Je ne me sens pas bien reposé-e lorsque la nuit précédente a été bruyante _____ <input type="radio"/></p> <p>▪ Vivre dans une rue bruyante ne me dérangerait pas _____ <input type="radio"/></p> <p>▪ Je suis prêt-e à accepter certains inconvénients pour vivre dans un endroit calme _____ <input type="radio"/></p> <p>▪ J'ai besoin de calme et de tranquillité pour effectuer un travail difficile _____ <input type="radio"/></p> <p>▪ Je peux m'endormir même quand c'est bruyant _____ <input type="radio"/></p> | <p>2901</p> <p>2902</p> <p>2903</p> <p>2904</p> <p>2905</p> <p>2906</p> <p>2907</p> <p>2908</p> <p>2909</p> <p>2910</p> <p>2911</p> <p>2912</p> <p>2913</p> |
| 2.10 | <p>Cette question concerne votre point de vue au sujet de l'environnement et de l'économie. Veuillez répondre de la façon la plus spontanée possible.</p> <p>Qu'est-ce qui est plus important pour vous ?</p> <p><input type="radio"/> Une place économique forte / une économie qui peut s'épanouir librement.</p> <p><input type="radio"/> Le calme et la protection de l'environnement / des normes sévères en matière de protection de l'environnement.</p>                                                                                                                                                                                                                                                                                                                                                                                                                                                                                                                                                                                                                                                                                                                                                                                                                                                                                                                                                                                                                                                                                                                                                                                                                                                                                                                                                                | 2100                                                                                                                                                        |

### 3. Emploi du temps, sommeil et qualité du sommeil

|     |                                                                                                                                                                                                   |      |
|-----|---------------------------------------------------------------------------------------------------------------------------------------------------------------------------------------------------|------|
| 3.1 | <p>Quand quittez-vous normalement la maison (le matin) pendant la semaine (lu-ve) ? à ____ h ____</p> <p>Et quand retournez-vous normalement à la maison ? à ____ h ____</p>                      | 3101 |
|     |                                                                                                                                                                                                   | 3102 |
| 3.2 | <p>Combien de fois par mois travaillez-vous pendant la nuit, c'est-à-dire entre 23 h et 6 h ?</p> <p><input type="radio"/> Jamais      <input type="radio"/> Nombre de nuits par mois : .....</p> | 3201 |

## Questionnaire de l'étude SiRENE

|                                                                                                                                                                                                                                                                                                                                                                                                                                                                                                                                                                                                                                                                                                                                                                                                                                                                                                                                                                                                                                                                                                                                                                                                                                                                                                                                                                                                                                                                                                                                                                                                                                                                                                                                                                                                                                                                                                                                                                                                                                                                                                                                                                                                                                                                                                                                                                                                                                                                                                                             |                                                 |                       |                       |                       |                       |                                                  |                       |                             |                       |                       |                                |                       |                       |                       |                       |                                                            |                       |                       |                       |                       |                                           |                                  |                       |                       |                       |                                             |                       |                       |                                        |                       |                                                                                                 |                       |                       |                       |                       |                                                                         |                       |                       |                       |                       |                       |                       |                         |                       |                       |                       |                       |                       |                       |                                    |                       |                       |                       |                       |                       |                       |                                                    |                       |                       |                       |                       |                       |                       |                                                                                                 |
|-----------------------------------------------------------------------------------------------------------------------------------------------------------------------------------------------------------------------------------------------------------------------------------------------------------------------------------------------------------------------------------------------------------------------------------------------------------------------------------------------------------------------------------------------------------------------------------------------------------------------------------------------------------------------------------------------------------------------------------------------------------------------------------------------------------------------------------------------------------------------------------------------------------------------------------------------------------------------------------------------------------------------------------------------------------------------------------------------------------------------------------------------------------------------------------------------------------------------------------------------------------------------------------------------------------------------------------------------------------------------------------------------------------------------------------------------------------------------------------------------------------------------------------------------------------------------------------------------------------------------------------------------------------------------------------------------------------------------------------------------------------------------------------------------------------------------------------------------------------------------------------------------------------------------------------------------------------------------------------------------------------------------------------------------------------------------------------------------------------------------------------------------------------------------------------------------------------------------------------------------------------------------------------------------------------------------------------------------------------------------------------------------------------------------------------------------------------------------------------------------------------------------------|-------------------------------------------------|-----------------------|-----------------------|-----------------------|-----------------------|--------------------------------------------------|-----------------------|-----------------------------|-----------------------|-----------------------|--------------------------------|-----------------------|-----------------------|-----------------------|-----------------------|------------------------------------------------------------|-----------------------|-----------------------|-----------------------|-----------------------|-------------------------------------------|----------------------------------|-----------------------|-----------------------|-----------------------|---------------------------------------------|-----------------------|-----------------------|----------------------------------------|-----------------------|-------------------------------------------------------------------------------------------------|-----------------------|-----------------------|-----------------------|-----------------------|-------------------------------------------------------------------------|-----------------------|-----------------------|-----------------------|-----------------------|-----------------------|-----------------------|-------------------------|-----------------------|-----------------------|-----------------------|-----------------------|-----------------------|-----------------------|------------------------------------|-----------------------|-----------------------|-----------------------|-----------------------|-----------------------|-----------------------|----------------------------------------------------|-----------------------|-----------------------|-----------------------|-----------------------|-----------------------|-----------------------|-------------------------------------------------------------------------------------------------|
| <p>3.3 Les questions qui suivent concernent vos habitudes en matière de sommeil. Soyez le plus précis possible dans vos réponses, qui doivent se rapporter à la majorité des jours et des nuits pendant les <u>quatre dernières semaines</u>.</p> <p>Après vous être couché-e, à quelle heure éteignez-vous normalement la lumière ?</p> <ul style="list-style-type: none"> <li>▪ en semaine (di-je) : à _____ h _____</li> <li>▪ le week-end (ve-sa) : à _____ h _____</li> </ul> <p>et à quelle heures vous levez-vous d'habitude ?</p> <ul style="list-style-type: none"> <li>▪ en semaine (lu-ve) : à _____ h _____</li> <li>▪ le week-end (sa-di) : à _____ h _____</li> </ul>                                                                                                                                                                                                                                                                                                                                                                                                                                                                                                                                                                                                                                                                                                                                                                                                                                                                                                                                                                                                                                                                                                                                                                                                                                                                                                                                                                                                                                                                                                                                                                                                                                                                                                                                                                                                                                         | <p>3301</p> <p>3302</p> <p>3303</p> <p>3304</p> |                       |                       |                       |                       |                                                  |                       |                             |                       |                       |                                |                       |                       |                       |                       |                                                            |                       |                       |                       |                       |                                           |                                  |                       |                       |                       |                                             |                       |                       |                                        |                       |                                                                                                 |                       |                       |                       |                       |                                                                         |                       |                       |                       |                       |                       |                       |                         |                       |                       |                       |                       |                       |                       |                                    |                       |                       |                       |                       |                       |                       |                                                    |                       |                       |                       |                       |                       |                       |                                                                                                 |
| <p>3.4 Combien de fois vous arrive-t-il...</p> <table border="0" style="width: 100%;"> <tr> <td></td> <td style="text-align: center;">jamais</td> <td style="text-align: center;">rarement</td> <td style="text-align: center;">parfois</td> <td style="text-align: center;">souvent</td> </tr> <tr> <td>▪ ... d'éprouver des difficultés à vous endormir</td> <td><input type="radio"/></td> <td><input type="radio"/></td> <td><input type="radio"/></td> <td><input type="radio"/></td> </tr> <tr> <td>▪ ... d'avoir un sommeil agité</td> <td><input type="radio"/></td> <td><input type="radio"/></td> <td><input type="radio"/></td> <td><input type="radio"/></td> </tr> <tr> <td>▪ ... de vous réveiller plusieurs fois au cours de la nuit</td> <td><input type="radio"/></td> <td><input type="radio"/></td> <td><input type="radio"/></td> <td><input type="radio"/></td> </tr> <tr> <td>▪ ... de vous réveiller trop tôt le matin</td> <td><input type="radio"/></td> <td><input type="radio"/></td> <td><input type="radio"/></td> <td><input type="radio"/></td> </tr> <tr> <td>▪ ... de ne pas vous sentir reposé le matin</td> <td><input type="radio"/></td> <td><input type="radio"/></td> <td><input type="radio"/></td> <td><input type="radio"/></td> </tr> <tr> <td>▪ ... d'être dérangé-e ou réveillé-e par des bruits dans la maison (p. ex. partenaire, enfants)</td> <td><input type="radio"/></td> <td><input type="radio"/></td> <td><input type="radio"/></td> <td><input type="radio"/></td> </tr> </table>                                                                                                                                                                                                                                                                                                                                                                                                                                                                                                                                                                                                                                                                                                                                                                                                                                                                                                                                                                                   |                                                 | jamais                | rarement              | parfois               | souvent               | ▪ ... d'éprouver des difficultés à vous endormir | <input type="radio"/> | <input type="radio"/>       | <input type="radio"/> | <input type="radio"/> | ▪ ... d'avoir un sommeil agité | <input type="radio"/> | <input type="radio"/> | <input type="radio"/> | <input type="radio"/> | ▪ ... de vous réveiller plusieurs fois au cours de la nuit | <input type="radio"/> | <input type="radio"/> | <input type="radio"/> | <input type="radio"/> | ▪ ... de vous réveiller trop tôt le matin | <input type="radio"/>            | <input type="radio"/> | <input type="radio"/> | <input type="radio"/> | ▪ ... de ne pas vous sentir reposé le matin | <input type="radio"/> | <input type="radio"/> | <input type="radio"/>                  | <input type="radio"/> | ▪ ... d'être dérangé-e ou réveillé-e par des bruits dans la maison (p. ex. partenaire, enfants) | <input type="radio"/> | <input type="radio"/> | <input type="radio"/> | <input type="radio"/> | <p>3401</p> <p>3402</p> <p>3403</p> <p>3404</p> <p>3405</p> <p>3406</p> |                       |                       |                       |                       |                       |                       |                         |                       |                       |                       |                       |                       |                       |                                    |                       |                       |                       |                       |                       |                       |                                                    |                       |                       |                       |                       |                       |                       |                                                                                                 |
|                                                                                                                                                                                                                                                                                                                                                                                                                                                                                                                                                                                                                                                                                                                                                                                                                                                                                                                                                                                                                                                                                                                                                                                                                                                                                                                                                                                                                                                                                                                                                                                                                                                                                                                                                                                                                                                                                                                                                                                                                                                                                                                                                                                                                                                                                                                                                                                                                                                                                                                             | jamais                                          | rarement              | parfois               | souvent               |                       |                                                  |                       |                             |                       |                       |                                |                       |                       |                       |                       |                                                            |                       |                       |                       |                       |                                           |                                  |                       |                       |                       |                                             |                       |                       |                                        |                       |                                                                                                 |                       |                       |                       |                       |                                                                         |                       |                       |                       |                       |                       |                       |                         |                       |                       |                       |                       |                       |                       |                                    |                       |                       |                       |                       |                       |                       |                                                    |                       |                       |                       |                       |                       |                       |                                                                                                 |
| ▪ ... d'éprouver des difficultés à vous endormir                                                                                                                                                                                                                                                                                                                                                                                                                                                                                                                                                                                                                                                                                                                                                                                                                                                                                                                                                                                                                                                                                                                                                                                                                                                                                                                                                                                                                                                                                                                                                                                                                                                                                                                                                                                                                                                                                                                                                                                                                                                                                                                                                                                                                                                                                                                                                                                                                                                                            | <input type="radio"/>                           | <input type="radio"/> | <input type="radio"/> | <input type="radio"/> |                       |                                                  |                       |                             |                       |                       |                                |                       |                       |                       |                       |                                                            |                       |                       |                       |                       |                                           |                                  |                       |                       |                       |                                             |                       |                       |                                        |                       |                                                                                                 |                       |                       |                       |                       |                                                                         |                       |                       |                       |                       |                       |                       |                         |                       |                       |                       |                       |                       |                       |                                    |                       |                       |                       |                       |                       |                       |                                                    |                       |                       |                       |                       |                       |                       |                                                                                                 |
| ▪ ... d'avoir un sommeil agité                                                                                                                                                                                                                                                                                                                                                                                                                                                                                                                                                                                                                                                                                                                                                                                                                                                                                                                                                                                                                                                                                                                                                                                                                                                                                                                                                                                                                                                                                                                                                                                                                                                                                                                                                                                                                                                                                                                                                                                                                                                                                                                                                                                                                                                                                                                                                                                                                                                                                              | <input type="radio"/>                           | <input type="radio"/> | <input type="radio"/> | <input type="radio"/> |                       |                                                  |                       |                             |                       |                       |                                |                       |                       |                       |                       |                                                            |                       |                       |                       |                       |                                           |                                  |                       |                       |                       |                                             |                       |                       |                                        |                       |                                                                                                 |                       |                       |                       |                       |                                                                         |                       |                       |                       |                       |                       |                       |                         |                       |                       |                       |                       |                       |                       |                                    |                       |                       |                       |                       |                       |                       |                                                    |                       |                       |                       |                       |                       |                       |                                                                                                 |
| ▪ ... de vous réveiller plusieurs fois au cours de la nuit                                                                                                                                                                                                                                                                                                                                                                                                                                                                                                                                                                                                                                                                                                                                                                                                                                                                                                                                                                                                                                                                                                                                                                                                                                                                                                                                                                                                                                                                                                                                                                                                                                                                                                                                                                                                                                                                                                                                                                                                                                                                                                                                                                                                                                                                                                                                                                                                                                                                  | <input type="radio"/>                           | <input type="radio"/> | <input type="radio"/> | <input type="radio"/> |                       |                                                  |                       |                             |                       |                       |                                |                       |                       |                       |                       |                                                            |                       |                       |                       |                       |                                           |                                  |                       |                       |                       |                                             |                       |                       |                                        |                       |                                                                                                 |                       |                       |                       |                       |                                                                         |                       |                       |                       |                       |                       |                       |                         |                       |                       |                       |                       |                       |                       |                                    |                       |                       |                       |                       |                       |                       |                                                    |                       |                       |                       |                       |                       |                       |                                                                                                 |
| ▪ ... de vous réveiller trop tôt le matin                                                                                                                                                                                                                                                                                                                                                                                                                                                                                                                                                                                                                                                                                                                                                                                                                                                                                                                                                                                                                                                                                                                                                                                                                                                                                                                                                                                                                                                                                                                                                                                                                                                                                                                                                                                                                                                                                                                                                                                                                                                                                                                                                                                                                                                                                                                                                                                                                                                                                   | <input type="radio"/>                           | <input type="radio"/> | <input type="radio"/> | <input type="radio"/> |                       |                                                  |                       |                             |                       |                       |                                |                       |                       |                       |                       |                                                            |                       |                       |                       |                       |                                           |                                  |                       |                       |                       |                                             |                       |                       |                                        |                       |                                                                                                 |                       |                       |                       |                       |                                                                         |                       |                       |                       |                       |                       |                       |                         |                       |                       |                       |                       |                       |                       |                                    |                       |                       |                       |                       |                       |                       |                                                    |                       |                       |                       |                       |                       |                       |                                                                                                 |
| ▪ ... de ne pas vous sentir reposé le matin                                                                                                                                                                                                                                                                                                                                                                                                                                                                                                                                                                                                                                                                                                                                                                                                                                                                                                                                                                                                                                                                                                                                                                                                                                                                                                                                                                                                                                                                                                                                                                                                                                                                                                                                                                                                                                                                                                                                                                                                                                                                                                                                                                                                                                                                                                                                                                                                                                                                                 | <input type="radio"/>                           | <input type="radio"/> | <input type="radio"/> | <input type="radio"/> |                       |                                                  |                       |                             |                       |                       |                                |                       |                       |                       |                       |                                                            |                       |                       |                       |                       |                                           |                                  |                       |                       |                       |                                             |                       |                       |                                        |                       |                                                                                                 |                       |                       |                       |                       |                                                                         |                       |                       |                       |                       |                       |                       |                         |                       |                       |                       |                       |                       |                       |                                    |                       |                       |                       |                       |                       |                       |                                                    |                       |                       |                       |                       |                       |                       |                                                                                                 |
| ▪ ... d'être dérangé-e ou réveillé-e par des bruits dans la maison (p. ex. partenaire, enfants)                                                                                                                                                                                                                                                                                                                                                                                                                                                                                                                                                                                                                                                                                                                                                                                                                                                                                                                                                                                                                                                                                                                                                                                                                                                                                                                                                                                                                                                                                                                                                                                                                                                                                                                                                                                                                                                                                                                                                                                                                                                                                                                                                                                                                                                                                                                                                                                                                             | <input type="radio"/>                           | <input type="radio"/> | <input type="radio"/> | <input type="radio"/> |                       |                                                  |                       |                             |                       |                       |                                |                       |                       |                       |                       |                                                            |                       |                       |                       |                       |                                           |                                  |                       |                       |                       |                                             |                       |                       |                                        |                       |                                                                                                 |                       |                       |                       |                       |                                                                         |                       |                       |                       |                       |                       |                       |                         |                       |                       |                       |                       |                       |                       |                                    |                       |                       |                       |                       |                       |                       |                                                    |                       |                       |                       |                       |                       |                       |                                                                                                 |
| <p>3.5 Combien de fois avez-vous pris des somnifères prescrits par le médecin <u>au cours des quatre dernières semaines</u> ?</p> <p><input type="radio"/> jamais                      <input type="radio"/> moins d'une fois par semaine</p> <p><input type="radio"/> une à deux fois par semaine    <input type="radio"/> trois fois ou plus par semaine</p>                                                                                                                                                                                                                                                                                                                                                                                                                                                                                                                                                                                                                                                                                                                                                                                                                                                                                                                                                                                                                                                                                                                                                                                                                                                                                                                                                                                                                                                                                                                                                                                                                                                                                                                                                                                                                                                                                                                                                                                                                                                                                                                                                              | <p>3501</p>                                     |                       |                       |                       |                       |                                                  |                       |                             |                       |                       |                                |                       |                       |                       |                       |                                                            |                       |                       |                       |                       |                                           |                                  |                       |                       |                       |                                             |                       |                       |                                        |                       |                                                                                                 |                       |                       |                       |                       |                                                                         |                       |                       |                       |                       |                       |                       |                         |                       |                       |                       |                       |                       |                       |                                    |                       |                       |                       |                       |                       |                       |                                                    |                       |                       |                       |                       |                       |                       |                                                                                                 |
| <p>3.6 Dans quelle position se trouvait généralement la fenêtre de votre chambre à coucher pendant la nuit <u>au cours des trois derniers mois</u> ?</p> <p><input type="radio"/> fermée      <input type="radio"/> complètement ouverte      <input type="radio"/> à moitié ouverte/en imposte</p> <p>Si vous aviez la fenêtre ouverte/à moitié ouverte, pourquoi ?      <input type="radio"/> air frais    <input type="radio"/> rafraîissement      <input type="radio"/> autres</p> <p>Si vous aviez la fenêtre fermée, pourquoi ?    <input type="radio"/> bruit      <input type="radio"/> perte de chaleur      <input type="radio"/> autres</p>                                                                                                                                                                                                                                                                                                                                                                                                                                                                                                                                                                                                                                                                                                                                                                                                                                                                                                                                                                                                                                                                                                                                                                                                                                                                                                                                                                                                                                                                                                                                                                                                                                                                                                                                                                                                                                                                     | <p>3601</p> <p>3602</p> <p>3603</p>             |                       |                       |                       |                       |                                                  |                       |                             |                       |                       |                                |                       |                       |                       |                       |                                                            |                       |                       |                       |                       |                                           |                                  |                       |                       |                       |                                             |                       |                       |                                        |                       |                                                                                                 |                       |                       |                       |                       |                                                                         |                       |                       |                       |                       |                       |                       |                         |                       |                       |                       |                       |                       |                       |                                    |                       |                       |                       |                       |                       |                       |                                                    |                       |                       |                       |                       |                       |                       |                                                                                                 |
| <p>3.7 À quelle fréquence recourez-vous aux mesures ci-dessous pour lutter contre la perturbation de votre sommeil par le bruit du trafic (route, rail, aviation) ?</p> <table border="0" style="width: 100%;"> <tr> <td></td> <td style="text-align: center;">jamais</td> <td style="text-align: center;">rarement</td> <td style="text-align: center;">parfois</td> <td style="text-align: center;">souvent</td> <td style="text-align: center;">très souvent</td> <td style="text-align: center;">toujours</td> </tr> <tr> <td>▪ Bouchons d'oreille/Oropax</td> <td><input type="radio"/></td> <td><input type="radio"/></td> <td><input type="radio"/></td> <td><input type="radio"/></td> <td><input type="radio"/></td> <td><input type="radio"/></td> </tr> <tr> <td>▪ Fermer la fenêtre</td> <td><input type="radio"/></td> <td><input type="radio"/></td> <td><input type="radio"/></td> <td><input type="radio"/></td> <td><input type="radio"/></td> <td><input type="radio"/></td> </tr> <tr> <td>▪ Modifier les heures de sommeil</td> <td><input type="radio"/></td> <td><input type="radio"/></td> <td><input type="radio"/></td> <td><input type="radio"/></td> <td><input type="radio"/></td> <td><input type="radio"/></td> </tr> <tr> <td>▪ Dormir ailleurs / changer de chambre</td> <td><input type="radio"/></td> <td><input type="radio"/></td> <td><input type="radio"/></td> <td><input type="radio"/></td> <td><input type="radio"/></td> <td><input type="radio"/></td> </tr> <tr> <td>▪ Prendre des somnifères / calmants</td> <td><input type="radio"/></td> <td><input type="radio"/></td> <td><input type="radio"/></td> <td><input type="radio"/></td> <td><input type="radio"/></td> <td><input type="radio"/></td> </tr> <tr> <td>▪ Consommer de l'alcool</td> <td><input type="radio"/></td> <td><input type="radio"/></td> <td><input type="radio"/></td> <td><input type="radio"/></td> <td><input type="radio"/></td> <td><input type="radio"/></td> </tr> <tr> <td>▪ Manger / grignoter quelque chose</td> <td><input type="radio"/></td> <td><input type="radio"/></td> <td><input type="radio"/></td> <td><input type="radio"/></td> <td><input type="radio"/></td> <td><input type="radio"/></td> </tr> <tr> <td>▪ Lecture, télévision, musique, tél. portable, ...</td> <td><input type="radio"/></td> <td><input type="radio"/></td> <td><input type="radio"/></td> <td><input type="radio"/></td> <td><input type="radio"/></td> <td><input type="radio"/></td> </tr> </table> |                                                 | jamais                | rarement              | parfois               | souvent               | très souvent                                     | toujours              | ▪ Bouchons d'oreille/Oropax | <input type="radio"/> | <input type="radio"/> | <input type="radio"/>          | <input type="radio"/> | <input type="radio"/> | <input type="radio"/> | ▪ Fermer la fenêtre   | <input type="radio"/>                                      | <input type="radio"/> | <input type="radio"/> | <input type="radio"/> | <input type="radio"/> | <input type="radio"/>                     | ▪ Modifier les heures de sommeil | <input type="radio"/> | <input type="radio"/> | <input type="radio"/> | <input type="radio"/>                       | <input type="radio"/> | <input type="radio"/> | ▪ Dormir ailleurs / changer de chambre | <input type="radio"/> | <input type="radio"/>                                                                           | <input type="radio"/> | <input type="radio"/> | <input type="radio"/> | <input type="radio"/> | ▪ Prendre des somnifères / calmants                                     | <input type="radio"/> | ▪ Consommer de l'alcool | <input type="radio"/> | ▪ Manger / grignoter quelque chose | <input type="radio"/> | ▪ Lecture, télévision, musique, tél. portable, ... | <input type="radio"/> | <p>3701</p> <p>3702</p> <p>3703</p> <p>3704</p> <p>3705</p> <p>3706</p> <p>3707</p> <p>3708</p> |
|                                                                                                                                                                                                                                                                                                                                                                                                                                                                                                                                                                                                                                                                                                                                                                                                                                                                                                                                                                                                                                                                                                                                                                                                                                                                                                                                                                                                                                                                                                                                                                                                                                                                                                                                                                                                                                                                                                                                                                                                                                                                                                                                                                                                                                                                                                                                                                                                                                                                                                                             | jamais                                          | rarement              | parfois               | souvent               | très souvent          | toujours                                         |                       |                             |                       |                       |                                |                       |                       |                       |                       |                                                            |                       |                       |                       |                       |                                           |                                  |                       |                       |                       |                                             |                       |                       |                                        |                       |                                                                                                 |                       |                       |                       |                       |                                                                         |                       |                       |                       |                       |                       |                       |                         |                       |                       |                       |                       |                       |                       |                                    |                       |                       |                       |                       |                       |                       |                                                    |                       |                       |                       |                       |                       |                       |                                                                                                 |
| ▪ Bouchons d'oreille/Oropax                                                                                                                                                                                                                                                                                                                                                                                                                                                                                                                                                                                                                                                                                                                                                                                                                                                                                                                                                                                                                                                                                                                                                                                                                                                                                                                                                                                                                                                                                                                                                                                                                                                                                                                                                                                                                                                                                                                                                                                                                                                                                                                                                                                                                                                                                                                                                                                                                                                                                                 | <input type="radio"/>                           | <input type="radio"/> | <input type="radio"/> | <input type="radio"/> | <input type="radio"/> | <input type="radio"/>                            |                       |                             |                       |                       |                                |                       |                       |                       |                       |                                                            |                       |                       |                       |                       |                                           |                                  |                       |                       |                       |                                             |                       |                       |                                        |                       |                                                                                                 |                       |                       |                       |                       |                                                                         |                       |                       |                       |                       |                       |                       |                         |                       |                       |                       |                       |                       |                       |                                    |                       |                       |                       |                       |                       |                       |                                                    |                       |                       |                       |                       |                       |                       |                                                                                                 |
| ▪ Fermer la fenêtre                                                                                                                                                                                                                                                                                                                                                                                                                                                                                                                                                                                                                                                                                                                                                                                                                                                                                                                                                                                                                                                                                                                                                                                                                                                                                                                                                                                                                                                                                                                                                                                                                                                                                                                                                                                                                                                                                                                                                                                                                                                                                                                                                                                                                                                                                                                                                                                                                                                                                                         | <input type="radio"/>                           | <input type="radio"/> | <input type="radio"/> | <input type="radio"/> | <input type="radio"/> | <input type="radio"/>                            |                       |                             |                       |                       |                                |                       |                       |                       |                       |                                                            |                       |                       |                       |                       |                                           |                                  |                       |                       |                       |                                             |                       |                       |                                        |                       |                                                                                                 |                       |                       |                       |                       |                                                                         |                       |                       |                       |                       |                       |                       |                         |                       |                       |                       |                       |                       |                       |                                    |                       |                       |                       |                       |                       |                       |                                                    |                       |                       |                       |                       |                       |                       |                                                                                                 |
| ▪ Modifier les heures de sommeil                                                                                                                                                                                                                                                                                                                                                                                                                                                                                                                                                                                                                                                                                                                                                                                                                                                                                                                                                                                                                                                                                                                                                                                                                                                                                                                                                                                                                                                                                                                                                                                                                                                                                                                                                                                                                                                                                                                                                                                                                                                                                                                                                                                                                                                                                                                                                                                                                                                                                            | <input type="radio"/>                           | <input type="radio"/> | <input type="radio"/> | <input type="radio"/> | <input type="radio"/> | <input type="radio"/>                            |                       |                             |                       |                       |                                |                       |                       |                       |                       |                                                            |                       |                       |                       |                       |                                           |                                  |                       |                       |                       |                                             |                       |                       |                                        |                       |                                                                                                 |                       |                       |                       |                       |                                                                         |                       |                       |                       |                       |                       |                       |                         |                       |                       |                       |                       |                       |                       |                                    |                       |                       |                       |                       |                       |                       |                                                    |                       |                       |                       |                       |                       |                       |                                                                                                 |
| ▪ Dormir ailleurs / changer de chambre                                                                                                                                                                                                                                                                                                                                                                                                                                                                                                                                                                                                                                                                                                                                                                                                                                                                                                                                                                                                                                                                                                                                                                                                                                                                                                                                                                                                                                                                                                                                                                                                                                                                                                                                                                                                                                                                                                                                                                                                                                                                                                                                                                                                                                                                                                                                                                                                                                                                                      | <input type="radio"/>                           | <input type="radio"/> | <input type="radio"/> | <input type="radio"/> | <input type="radio"/> | <input type="radio"/>                            |                       |                             |                       |                       |                                |                       |                       |                       |                       |                                                            |                       |                       |                       |                       |                                           |                                  |                       |                       |                       |                                             |                       |                       |                                        |                       |                                                                                                 |                       |                       |                       |                       |                                                                         |                       |                       |                       |                       |                       |                       |                         |                       |                       |                       |                       |                       |                       |                                    |                       |                       |                       |                       |                       |                       |                                                    |                       |                       |                       |                       |                       |                       |                                                                                                 |
| ▪ Prendre des somnifères / calmants                                                                                                                                                                                                                                                                                                                                                                                                                                                                                                                                                                                                                                                                                                                                                                                                                                                                                                                                                                                                                                                                                                                                                                                                                                                                                                                                                                                                                                                                                                                                                                                                                                                                                                                                                                                                                                                                                                                                                                                                                                                                                                                                                                                                                                                                                                                                                                                                                                                                                         | <input type="radio"/>                           | <input type="radio"/> | <input type="radio"/> | <input type="radio"/> | <input type="radio"/> | <input type="radio"/>                            |                       |                             |                       |                       |                                |                       |                       |                       |                       |                                                            |                       |                       |                       |                       |                                           |                                  |                       |                       |                       |                                             |                       |                       |                                        |                       |                                                                                                 |                       |                       |                       |                       |                                                                         |                       |                       |                       |                       |                       |                       |                         |                       |                       |                       |                       |                       |                       |                                    |                       |                       |                       |                       |                       |                       |                                                    |                       |                       |                       |                       |                       |                       |                                                                                                 |
| ▪ Consommer de l'alcool                                                                                                                                                                                                                                                                                                                                                                                                                                                                                                                                                                                                                                                                                                                                                                                                                                                                                                                                                                                                                                                                                                                                                                                                                                                                                                                                                                                                                                                                                                                                                                                                                                                                                                                                                                                                                                                                                                                                                                                                                                                                                                                                                                                                                                                                                                                                                                                                                                                                                                     | <input type="radio"/>                           | <input type="radio"/> | <input type="radio"/> | <input type="radio"/> | <input type="radio"/> | <input type="radio"/>                            |                       |                             |                       |                       |                                |                       |                       |                       |                       |                                                            |                       |                       |                       |                       |                                           |                                  |                       |                       |                       |                                             |                       |                       |                                        |                       |                                                                                                 |                       |                       |                       |                       |                                                                         |                       |                       |                       |                       |                       |                       |                         |                       |                       |                       |                       |                       |                       |                                    |                       |                       |                       |                       |                       |                       |                                                    |                       |                       |                       |                       |                       |                       |                                                                                                 |
| ▪ Manger / grignoter quelque chose                                                                                                                                                                                                                                                                                                                                                                                                                                                                                                                                                                                                                                                                                                                                                                                                                                                                                                                                                                                                                                                                                                                                                                                                                                                                                                                                                                                                                                                                                                                                                                                                                                                                                                                                                                                                                                                                                                                                                                                                                                                                                                                                                                                                                                                                                                                                                                                                                                                                                          | <input type="radio"/>                           | <input type="radio"/> | <input type="radio"/> | <input type="radio"/> | <input type="radio"/> | <input type="radio"/>                            |                       |                             |                       |                       |                                |                       |                       |                       |                       |                                                            |                       |                       |                       |                       |                                           |                                  |                       |                       |                       |                                             |                       |                       |                                        |                       |                                                                                                 |                       |                       |                       |                       |                                                                         |                       |                       |                       |                       |                       |                       |                         |                       |                       |                       |                       |                       |                       |                                    |                       |                       |                       |                       |                       |                       |                                                    |                       |                       |                       |                       |                       |                       |                                                                                                 |
| ▪ Lecture, télévision, musique, tél. portable, ...                                                                                                                                                                                                                                                                                                                                                                                                                                                                                                                                                                                                                                                                                                                                                                                                                                                                                                                                                                                                                                                                                                                                                                                                                                                                                                                                                                                                                                                                                                                                                                                                                                                                                                                                                                                                                                                                                                                                                                                                                                                                                                                                                                                                                                                                                                                                                                                                                                                                          | <input type="radio"/>                           | <input type="radio"/> | <input type="radio"/> | <input type="radio"/> | <input type="radio"/> | <input type="radio"/>                            |                       |                             |                       |                       |                                |                       |                       |                       |                       |                                                            |                       |                       |                       |                       |                                           |                                  |                       |                       |                       |                                             |                       |                       |                                        |                       |                                                                                                 |                       |                       |                       |                       |                                                                         |                       |                       |                       |                       |                       |                       |                         |                       |                       |                       |                       |                       |                       |                                    |                       |                       |                       |                       |                       |                       |                                                    |                       |                       |                       |                       |                       |                       |                                                                                                 |

## 4. Comportements et personnalité

|                                                                                                                                                                                                                                                                                                                                                                                                                                                                                                                                                                                                                                                                                                                                                                                                                                                                                                                                                                                                                                                                                                                                                                                                                                                                                                                                                                                                                                                                                                                                                                                                                                                                                                     |                       |                       |                       |                       |                       |   |                       |                       |                       |                       |                       |                       |   |   |   |   |   |   |                       |                       |                       |                       |                       |                       |                         |
|-----------------------------------------------------------------------------------------------------------------------------------------------------------------------------------------------------------------------------------------------------------------------------------------------------------------------------------------------------------------------------------------------------------------------------------------------------------------------------------------------------------------------------------------------------------------------------------------------------------------------------------------------------------------------------------------------------------------------------------------------------------------------------------------------------------------------------------------------------------------------------------------------------------------------------------------------------------------------------------------------------------------------------------------------------------------------------------------------------------------------------------------------------------------------------------------------------------------------------------------------------------------------------------------------------------------------------------------------------------------------------------------------------------------------------------------------------------------------------------------------------------------------------------------------------------------------------------------------------------------------------------------------------------------------------------------------------|-----------------------|-----------------------|-----------------------|-----------------------|-----------------------|---|-----------------------|-----------------------|-----------------------|-----------------------|-----------------------|-----------------------|---|---|---|---|---|---|-----------------------|-----------------------|-----------------------|-----------------------|-----------------------|-----------------------|-------------------------|
| <p>4.1 Sur une échelle de 1 à 6, comment jugeriez-vous votre capacité à gérer le stress ?<br/>(1 = "Je me libère du stress", 6 = "Le stress me ronge")</p> <table border="0" style="width: 100%;"> <tr> <td style="text-align: center;">1</td> <td style="text-align: center;">2</td> <td style="text-align: center;">3</td> <td style="text-align: center;">4</td> <td style="text-align: center;">5</td> <td style="text-align: center;">6</td> </tr> <tr> <td style="text-align: center;"><input type="radio"/></td> </tr> </table> <p>Durant l'année dernière, comment jugeriez-vous le niveau de stress dans votre vie (à la maison et au travail) ? (1 = "pas de stress", 6 = "stress extrême")</p> <table border="0" style="width: 100%;"> <tr> <td style="text-align: center;">1</td> <td style="text-align: center;">2</td> <td style="text-align: center;">3</td> <td style="text-align: center;">4</td> <td style="text-align: center;">5</td> <td style="text-align: center;">6</td> </tr> <tr> <td style="text-align: center;"><input type="radio"/></td> </tr> </table> | 1                     | 2                     | 3                     | 4                     | 5                     | 6 | <input type="radio"/> | 1 | 2 | 3 | 4 | 5 | 6 | <input type="radio"/> | <p>4201</p> <p>4202</p> |
| 1                                                                                                                                                                                                                                                                                                                                                                                                                                                                                                                                                                                                                                                                                                                                                                                                                                                                                                                                                                                                                                                                                                                                                                                                                                                                                                                                                                                                                                                                                                                                                                                                                                                                                                   | 2                     | 3                     | 4                     | 5                     | 6                     |   |                       |                       |                       |                       |                       |                       |   |   |   |   |   |   |                       |                       |                       |                       |                       |                       |                         |
| <input type="radio"/>                                                                                                                                                                                                                                                                                                                                                                                                                                                                                                                                                                                                                                                                                                                                                                                                                                                                                                                                                                                                                                                                                                                                                                                                                                                                                                                                                                                                                                                                                                                                                                                                                                                                               | <input type="radio"/> | <input type="radio"/> | <input type="radio"/> | <input type="radio"/> | <input type="radio"/> |   |                       |                       |                       |                       |                       |                       |   |   |   |   |   |   |                       |                       |                       |                       |                       |                       |                         |
| 1                                                                                                                                                                                                                                                                                                                                                                                                                                                                                                                                                                                                                                                                                                                                                                                                                                                                                                                                                                                                                                                                                                                                                                                                                                                                                                                                                                                                                                                                                                                                                                                                                                                                                                   | 2                     | 3                     | 4                     | 5                     | 6                     |   |                       |                       |                       |                       |                       |                       |   |   |   |   |   |   |                       |                       |                       |                       |                       |                       |                         |
| <input type="radio"/>                                                                                                                                                                                                                                                                                                                                                                                                                                                                                                                                                                                                                                                                                                                                                                                                                                                                                                                                                                                                                                                                                                                                                                                                                                                                                                                                                                                                                                                                                                                                                                                                                                                                               | <input type="radio"/> | <input type="radio"/> | <input type="radio"/> | <input type="radio"/> | <input type="radio"/> |   |                       |                       |                       |                       |                       |                       |   |   |   |   |   |   |                       |                       |                       |                       |                       |                       |                         |

4.2 Vous trouvez ci-après un certain nombre d'affirmations. Veuillez les lire attentivement et indiquer dans quelle mesure chacune d'entre elle est vraie d'une manière générale dans votre cas, c'est-à-dire dans quelle mesure elle reflète votre façon de penser et d'agir.

(veuillez entourer le chiffre qui convient)

(veuillez entourer le chiffre qui convient)

|                                                                                         | je ne<br>suis pas<br>d'accord |   | je suis<br>entièrement<br>d'accord |   |   |   |   |      |
|-----------------------------------------------------------------------------------------|-------------------------------|---|------------------------------------|---|---|---|---|------|
| ▪ Quand j'ai des projets, je les mène à bien                                            | 1                             | 2 | 3                                  | 4 | 5 | 6 | 7 | 4101 |
| ▪ D'habitude j'arrive à tout faire d'une façon<br>ou d'une autre                        | 1                             | 2 | 3                                  | 4 | 5 | 6 | 7 | 4102 |
| ▪ Pour moi, il est important d'être toujours<br>intéressé-e par beaucoup de choses      | 1                             | 2 | 3                                  | 4 | 5 | 6 | 7 | 4103 |
| ▪ Je peux faire plusieurs choses en même temps                                          | 1                             | 2 | 3                                  | 4 | 5 | 6 | 7 | 4104 |
| ▪ Je suis une personne décidée                                                          | 1                             | 2 | 3                                  | 4 | 5 | 6 | 7 | 4105 |
| ▪ Je m'intéresse à beaucoup de choses                                                   | 1                             | 2 | 3                                  | 4 | 5 | 6 | 7 | 4106 |
| ▪ Je trouve souvent des choses qui me font rire                                         | 1                             | 2 | 3                                  | 4 | 5 | 6 | 7 | 4107 |
| ▪ Normalement, je peux considérer une situation<br>sous différents angles               | 1                             | 2 | 3                                  | 4 | 5 | 6 | 7 | 4108 |
| ▪ Je peux me forcer à faire aussi des choses<br>que je n'ai pas vraiment envie de faire | 1                             | 2 | 3                                  | 4 | 5 | 6 | 7 | 4109 |
| ▪ J'ai assez d'énergie pour faire tout ce que<br>je dois faire                          | 1                             | 2 | 3                                  | 4 | 5 | 6 | 7 | 4110 |

4.3 Nous sommes intéressés par la façon dont les personnes réagissent lorsqu'elles sont confrontées aux événements difficiles ou stressants dans leur vie. Veuillez indiquer dans quelle mesure les affirmations ci-dessous se sont appliquées à votre façon de penser et d'agir dans des situations passées, désagréables ou difficiles. Merci de donner une réponse pour chaque affirmation.

|                                                                                                       | pas du<br>tout | un<br>petit peu | beau-<br>coup | tout à<br>fait |      |
|-------------------------------------------------------------------------------------------------------|----------------|-----------------|---------------|----------------|------|
| ▪ Je me suis tourné vers le travail ou d'autres activités pour me changer les idées                   | ○              | ○               | ○             | ○              | 4301 |
| ▪ J'ai concentré mes efforts pour résoudre la situation                                               | ○              | ○               | ○             | ○              | 4302 |
| ▪ Je me suis dit que ce n'était pas réel                                                              | ○              | ○               | ○             | ○              | 4303 |
| ▪ J'ai recherché un soutien émotionnel auprès d'autres                                                | ○              | ○               | ○             | ○              | 4304 |
| ▪ J'ai abandonné l'espoir de faire face                                                               | ○              | ○               | ○             | ○              | 4305 |
| ▪ J'ai déterminé une ligne d'action et je l'ai suivie                                                 | ○              | ○               | ○             | ○              | 4306 |
| ▪ J'ai refusé de croire que ça m'arrivait                                                             | ○              | ○               | ○             | ○              | 4307 |
| ▪ J'ai exprimé mes sentiments négatifs                                                                | ○              | ○               | ○             | ○              | 4308 |
| ▪ J'ai essayé d'avoir des conseils ou de l'aide d'autres personnes à propos de ce qu'il fallait faire | ○              | ○               | ○             | ○              | 4309 |
| ▪ J'ai recherché les aspects positifs dans ce qu'il m'arrivait                                        | ○              | ○               | ○             | ○              | 4310 |
| ▪ J'ai planifié les étapes à suivre                                                                   | ○              | ○               | ○             | ○              | 4311 |
| ▪ J'ai recherché le soutien et la compréhension de quelqu'un                                          | ○              | ○               | ○             | ○              | 4312 |
| ▪ J'ai renoncé à essayer de résoudre la situation                                                     | ○              | ○               | ○             | ○              | 4313 |
| ▪ J'ai essayé de voir la situation sous un jour plus positif                                          | ○              | ○               | ○             | ○              | 4314 |
| ▪ J'ai fait quelque chose pour moins y penser                                                         | ○              | ○               | ○             | ○              | 4315 |
| ▪ J'ai accepté la réalité de ma nouvelle situation                                                    | ○              | ○               | ○             | ○              | 4316 |
| ▪ J'ai évacué mes sentiments déplaisants en en parlant                                                | ○              | ○               | ○             | ○              | 4317 |
| ▪ J'ai recherché l'aide et le conseil d'autres personnes                                              | ○              | ○               | ○             | ○              | 4318 |
| ▪ J'ai appris à vivre dans ma nouvelle situation                                                      | ○              | ○               | ○             | ○              | 4319 |
| ▪ J'ai essayé d'élaborer une stratégie à propos de ce qu'il y avait à faire                           | ○              | ○               | ○             | ○              | 4320 |

## Questionnaire de l'étude SiRENE

|     |                                                                                                                                                                                                                                                                                                                                                                                                                                                                                                                                                                                                                                                                                                                                                                                                                        |                                                                 |
|-----|------------------------------------------------------------------------------------------------------------------------------------------------------------------------------------------------------------------------------------------------------------------------------------------------------------------------------------------------------------------------------------------------------------------------------------------------------------------------------------------------------------------------------------------------------------------------------------------------------------------------------------------------------------------------------------------------------------------------------------------------------------------------------------------------------------------------|-----------------------------------------------------------------|
| 4.4 | Les affirmations ci-dessous peuvent s'appliquer plus ou moins à vous. Veuillez indiquer dans quelle mesure chacune d'entre elles est vraie dans votre cas.                                                                                                                                                                                                                                                                                                                                                                                                                                                                                                                                                                                                                                                             |                                                                 |
|     | <p style="text-align: center;"> <b>pas du tout vrai</b>      <b>très peu vrai</b>      <b>un peu vrai</b>      <b>assez vrai</b>      <b>tout à fait vrai</b> </p>                                                                                                                                                                                                                                                                                                                                                                                                                                                                                                                                                                                                                                                     |                                                                 |
|     | <ul style="list-style-type: none"> <li>▪ Je suis maître/maîtresse de ma propre vie — <input type="radio"/> — <input type="radio"/> — <input type="radio"/> — <input type="radio"/> — <input type="radio"/></li> <li>▪ Si je fais des efforts, je peux aussi avoir du succès — <input type="radio"/> — <input type="radio"/> — <input type="radio"/> — <input type="radio"/> — <input type="radio"/></li> <li>▪ Qu'il s'agisse de ma vie privée ou professionnelle, ce sont d'autres surtout qui décident — <input type="radio"/> — <input type="radio"/> — <input type="radio"/> — <input type="radio"/> — <input type="radio"/></li> <li>▪ Le destin contrarie souvent mes projets — <input type="radio"/> — <input type="radio"/> — <input type="radio"/> — <input type="radio"/> — <input type="radio"/></li> </ul> | <div>4401</div> <div>4402</div> <div>4403</div> <div>4404</div> |

### 5. Santé en général et comportement en matière de santé

|     |                                                                                                                                                                                                                 |                                                                                                        |        |
|-----|-----------------------------------------------------------------------------------------------------------------------------------------------------------------------------------------------------------------|--------------------------------------------------------------------------------------------------------|--------|
| 5.1 | Quelle est votre taille ? ..... cm.                                                                                                                                                                             | Quel est votre poids ? ..... kg.                                                                       | 5101/2 |
| 5.2 | Comment est votre état de santé en général ?                                                                                                                                                                    |                                                                                                        |        |
|     | <input type="radio"/> très bon <input type="radio"/> bon <input type="radio"/> assez bon <input type="radio"/> mauvais <input type="radio"/> très mauvais                                                       |                                                                                                        | 5201   |
|     | Un médecin a-t-il jamais diagnostiqué du diabète chez vous ?                                                                                                                                                    | <input type="radio"/> oui <input type="radio"/> non                                                    | 5202   |
|     | Un médecin a-t-il jamais diagnostiqué une hypertension chez vous ?                                                                                                                                              | <input type="radio"/> oui <input type="radio"/> non                                                    | 5203   |
|     | Souffrez-vous de problèmes d'ouïe ?                                                                                                                                                                             | <input type="radio"/> oui (→ <input type="radio"/> j'ai un appareil auditif) <input type="radio"/> non | 5204   |
| 5.3 | Les questions ci-après concernent votre bien-être, comment vous vous êtes senti-e ces <u>quatre dernières semaines</u> . Pour chaque question, veuillez indiquer la réponse qui vous semble la plus appropriée. |                                                                                                        |        |
|     | Au cours de ces quatre dernières semaines, y a-t-il eu des moments où...                                                                                                                                        |                                                                                                        |        |
|     | <p style="text-align: center;"> <b>jamais</b>      <b>ra-remment</b>      <b>quelques fois</b>      <b>très souvent</b>      <b>en permanence</b> </p>                                                          |                                                                                                        |        |
|     | ▪ vous vous êtes senti-e très nerveux/nerveuse ? — <input type="radio"/>                                        |                                                                                                        | 5301   |
|     | ▪ vous vous êtes senti-e si découragé-e que rien ne pouvait vous remonter le moral ? — <input type="radio"/>    |                                                                                                        | 5302   |
|     | ▪ vous vous êtes senti-e calme et détendu-e ? — <input type="radio"/>                                           |                                                                                                        | 5303   |
|     | ▪ vous vous êtes senti-e triste et abattu-e ? — <input type="radio"/>                                           |                                                                                                        | 5304   |
|     | ▪ vous vous êtes senti-e bien dans votre peau ? — <input type="radio"/>                                         |                                                                                                        | 5305   |
| 5.4 | Ce bloc de questions concerne votre comportement en matière de santé et d'exercice physique.                                                                                                                    |                                                                                                        |        |
|     | Fumez-vous actuellement (au cours du dernier mois) des cigarettes ?                                                                                                                                             |                                                                                                        |        |
|     | <input type="radio"/> Oui (→ je fume en moyenne ..... cigarettes par jour)                                                                                                                                      |                                                                                                        | 5401/2 |
|     | <input type="radio"/> Non (→ <input type="radio"/> j'ai fumé, mais ne fume plus depuis ..... années)                                                                                                            |                                                                                                        | 5403   |
|     | <input type="radio"/> Je n'ai jamais fumé                                                                                                                                                                       |                                                                                                        |        |
|     | Pendant combien d'heures et de minutes, au cours de la dernière semaine, avez-vous exercé une activité physique durant vos loisirs qui vous a fait transpirer (p. ex. course à pied, vélo, etc.) ?              |                                                                                                        |        |
|     | _____ heures _____ minutes <b>durant la dernière semaine</b>                                                                                                                                                    |                                                                                                        | 5404   |
|     | Pendant combien de temps, au cours de la dernière semaine, avez-vous bougé de façon à être au moins un peu essouffé-e (p. ex. marche rapide, randonnée, danse, jardinage ou diverses activités sportives) ?     |                                                                                                        |        |
|     | _____ heures _____ minutes <b>durant la dernière semaine</b>                                                                                                                                                    |                                                                                                        | 5405   |

## 6. Profession et situation professionnelle

|                                                                                                                                                                                                                                                                                                                                                                                                                                                                                                                                                                                                                                                                                                                                                                                                                                                                                                                                                                                                                                                                                                                                                                                                                                                                                                                                            |                                      |
|--------------------------------------------------------------------------------------------------------------------------------------------------------------------------------------------------------------------------------------------------------------------------------------------------------------------------------------------------------------------------------------------------------------------------------------------------------------------------------------------------------------------------------------------------------------------------------------------------------------------------------------------------------------------------------------------------------------------------------------------------------------------------------------------------------------------------------------------------------------------------------------------------------------------------------------------------------------------------------------------------------------------------------------------------------------------------------------------------------------------------------------------------------------------------------------------------------------------------------------------------------------------------------------------------------------------------------------------|--------------------------------------|
| <p>6.1 Par les questions qui suivent, nous souhaitons réunir quelques informations sur votre situation professionnelle, votre formation et votre profession.</p> <p>Exercez-vous actuellement une activité lucrative ?</p> <p> <input type="radio"/> oui, plein temps    <input type="radio"/> oui, temps partiel .....%    <input type="radio"/> en formation (école, études, apprent.)<br/> <input type="radio"/> non, mais recherche un emploi    <input type="radio"/> rentier/rentière, retraité-e<br/> <input type="radio"/> non, ne recherche pas d'emploi    <input type="radio"/> autres<br/>         (p. ex. femme/homme au foyer)       </p> <p>Si vous avez une activité lucrative, quel métier exercez-vous actuellement?<br/>         (soyez le plus précis possible svp)</p> <p>.....</p>                                                                                                                                                                                                                                                                                                                                                                                                                                                                                                                                   | 6101<br>6102<br><br><br><br><br>6103 |
| <p>6.2 Quel métier exerçait votre père / votre mère lorsque vous étiez enfant ?</p> <p>P. du père : ..... P. de la mère : .....</p>                                                                                                                                                                                                                                                                                                                                                                                                                                                                                                                                                                                                                                                                                                                                                                                                                                                                                                                                                                                                                                                                                                                                                                                                        | 6201<br>6202                         |
| <p>6.3 Quel est le niveau de formation le plus élevé que vous ayez atteint (achevé) ?</p> <p> <input type="radio"/> École primaire<br/> <input type="radio"/> École obligatoire : 9 années (enseignement secondaire I)<br/> <input type="radio"/> Offres transitoires : préapprentissage, 10<sup>e</sup> année, école d'orientation professionnelle, année d'apprentissage en intendance, etc.<br/> <input type="radio"/> École de degré diplôme (EDD), école de culture générale (ECG) ou analogue<br/> <input type="radio"/> Apprentissage avec cert. de capacité/attestation de form. prof. ou école prof. à plein temps<br/> <input type="radio"/> Maturité professionnelle ou spécialisée<br/> <input type="radio"/> Maturité gymnasiale, école normale, maturité pour adultes<br/> <input type="radio"/> Formation professionnelle supérieure avec brevet fédéral, maîtrise fédérale ou formation équivalente<br/> <input type="radio"/> École supérieure (ES) en technique, école technique, ES d'économie (ou ESGC)<br/> <input type="radio"/> École d'ingénieur ETS, école supérieure spécialisée, ESCEA, ESAA, ESTS ou analogue<br/> <input type="radio"/> Bachelor (université, EPF, HES, HEP)<br/> <input type="radio"/> Master, licence ou diplôme (université, EPF, HES, HEP)<br/> <input type="radio"/> Doctorat       </p> | 6301                                 |

Vous avez presque terminé! Nous vous saurions gré de répondre encore aux questions suivantes :

|                                                                                                                                                                                                                                                                                                                                                                                 |    |
|---------------------------------------------------------------------------------------------------------------------------------------------------------------------------------------------------------------------------------------------------------------------------------------------------------------------------------------------------------------------------------|----|
| <p> Souhaitez-vous participer au tirage au sort de trois iPad Mini Retina de la marque Apple ?</p> <p><input type="radio"/> oui    <input type="radio"/> non</p>                                                                                                                             | P1 |
| <p>Seriez-vous intéressé-e à participer à l'une des études scientifiques suivantes comme sujet de recherche volontaire (mais rémunéré) ?</p> <p> <input type="radio"/> oui, essais sur le sommeil en laboratoire, au centre de chronobiologie de l'Université de Bâle<br/> <input type="radio"/> oui, mesurages du bruit à mon domicile    <input type="radio"/> non       </p> | P2 |
| <p>Souhaitez-vous être informé-e des résultats de l'étude SiRENE ?</p> <p><input type="radio"/> oui    <input type="radio"/> non</p>                                                                                                                                                                                                                                            | P3 |
| <p>Nous autorisez-vous à reprendre éventuellement contact avec vous pour un autre sondage en futur ?</p> <p><input type="radio"/> oui    <input type="radio"/> non</p>                                                                                                                                                                                                          | P4 |
| <p>Si vous avez répondu par « oui » à une ou plusieurs des questions ci-dessus, nous vous saurions gré de nous indiquer votre nom, votre adresse postale et/ou électronique ou votre numéro de téléphone afin que nous puissions reprendre contact avec vous :</p> <p>.....</p> <p>.....</p>                                                                                    | P5 |

☺ Nous vous remercions cordialement de votre participation! ☺

## Questionnaire de l'étude SiRENE

Adresse de retour :

Office Fédérale de l'Environnement OFEV  
Div. Bruit et RNI  
Étude SiRENE / BMK  
3003 Berne

Fax: 058 462 17 57  
Courriel: mark.brink@bafu.admin.ch

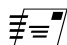

Veillez utiliser l'enveloppe affranchie et adressée pour renvoyer le questionnaire.

Vous pouvez utiliser l'espace ci-dessous pour d'éventuels commentaires :





## Questionario per lo studio SiRENE

Il presente questionario è strutturato nelle seguenti sezioni: «Dati personali e informazioni sulla situazione abitativa», «Effetti nocivi e molesti del rumore», «Impiego del tempo, sonno e qualità del sonno», «Comportamento e personalità», «Stato di salute generale e comportamento in materia di salute», «Situazione lavorativa e professionale». La preghiamo di rispondere a tutte le domande, anche a quelle che apparentemente non hanno nulla a che vedere con il rumore, poiché forniscono indicazioni utili ai fini del sondaggio. Grazie sin da ora per la collaborazione.

*Nelle domande in cui figurano una o più caselle tonde (○) barri la risposta che meglio rispecchia la sua situazione. Nel caso in cui ci siano più risposte che rispecchiano una situazione, barri per favore tutte le risposte corrispondenti. Nelle risposte seguite da una linea tratteggiata (.....) o da una sottolineatura (\_\_\_\_) può inserire parole o numeri. Nelle domande seguite da numeri (1-2-3...) metta un cerchio attorno al numero che ritiene più appropriato.*

| 1. Dati personali e informazioni sulla situazione abitativa |                                                                                                 |        |
|-------------------------------------------------------------|-------------------------------------------------------------------------------------------------|--------|
| 1.1                                                         | Data odierna (gg.mm.aa): .....                                                                  | 1101   |
| 1.2                                                         | Anno di nascita: ..... Sesso: ○ donna ○ uomo                                                    | 1201/2 |
| 1.3                                                         | L'indirizzo sulla lettera di accompagnamento è il suo domicilio abituale? ○ sì ○ no             | 1301   |
| 1.4                                                         | Da quanti anni abita nell'appartamento / casa attuale? ..... anni ○ non so                      | 1401   |
|                                                             | Quanti anni ha la casa in cui vive? ..... anni ○ non so                                         | 1402   |
| 1.5                                                         | Lei vive: ○ da solo ○ in coppia ○ in comunità abitativa ○ altro (○ con figli)                   | 1501   |
|                                                             | Quante persone (figli compresi) vivono nella sua economia domestica? ..... persone              | 1502   |
| 1.6                                                         | In che tipo di appartamento / casa vive? ○ casa unifamiliare / gemella / a schiera              | 1601   |
|                                                             | ○ appartamento a pianterreno                                                                    | 1602   |
|                                                             | ○ appartamento al ..... piano                                                                   |        |
|                                                             | Il suo appartamento è dotato di... ■ finestre fonoisolanti? ○ sì ○ no ○ non so                  | 1603   |
|                                                             | ■ ventilatori insonorizzati? ○ sì ○ no ○ non so                                                 | 1604   |
|                                                             | ■ aerazione controllata? ○ sì ○ no ○ non so                                                     | 1605   |
|                                                             | È (co)proprietario o locatario dell'appartamento o della casa in cui vive?                      |        |
|                                                             | ○ proprietario ○ coproprietario/a ○ socio ○ locatario                                           | 1606   |
| 1.7                                                         | Come è posizionata la sua stanza da letto rispetto alla strada con traffico intenso più vicina? |        |
|                                                             | ○ è lontana o dà su un cortile interno ○ è laterale rispetto alla strada ○ dà sulla strada      | 1701   |
|                                                             | Se la sua stanza da letto si affaccia sulla strada, indichi il nome della strada.               |        |
|                                                             | Nome della strada: .....                                                                        | 1702   |

| 2. Effetti nocivi e molesti del rumore |                                                                                                                                                                                                  |
|----------------------------------------|--------------------------------------------------------------------------------------------------------------------------------------------------------------------------------------------------|
| 2.1                                    | Ripensando agli ultimi dodici mesi, in che misura si è sentito disturbato o molestato dal rumore del traffico stradale, ferroviario o aereo? <span style="float: right;">↻ voltare pagina</span> |

## Questionario per lo studio SiRENE

|                      |                       |                       |                       |                       |                       |      |
|----------------------|-----------------------|-----------------------|-----------------------|-----------------------|-----------------------|------|
|                      | per nulla             | poco                  | abbastanza            | molto                 | moltissimo            |      |
| Traffico stradale    | <input type="radio"/> | 2101 |
| Traffico ferroviario | <input type="radio"/> | 2102 |
| Traffico aereo       | <input type="radio"/> | 2103 |

  

2.2 Ripensando agli ultimi dodici mesi, da 0 a 10 quanto si è sentito disturbato o molestato dal rumore del traffico stradale, ferroviario o aereo? (*cerchiare il numero che meglio corrisponde alla sua situazione*)

Rumore del Traffico stradale

Rumore del traffico ferroviario

Rumore del traffico aereo

2201

2202

2203

  

2.3 Vi sono orari specifici (diurni o notturni) in cui il rumore del traffico stradale la disturba o molesta in maniera particolarmente forte?

☐ no                      ☐ sì, dalle \_\_\_\_ . \_\_\_\_ alle \_\_\_\_ . \_\_\_\_  
e dalle \_\_\_\_ . \_\_\_\_ alle \_\_\_\_ . \_\_\_\_  
e dalle \_\_\_\_ . \_\_\_\_ alle \_\_\_\_ . \_\_\_\_

2301

2302

2303

  

2.4 Vi sono orari specifici (diurni o notturni) in cui il rumore del traffico ferroviario la disturba o molesta in maniera particolarmente forte?

☐ no                      ☐ sì, dalle \_\_\_\_ . \_\_\_\_ alle \_\_\_\_ . \_\_\_\_  
e dalle \_\_\_\_ . \_\_\_\_ alle \_\_\_\_ . \_\_\_\_  
e dalle \_\_\_\_ . \_\_\_\_ alle \_\_\_\_ . \_\_\_\_

2401

2402

2403

  

2.5 Vi sono orari specifici (diurni o notturni) in cui il rumore del traffico aereo la disturba o molesta in maniera particolarmente forte?

☐ no                      ☐ sì, dalle \_\_\_\_ . \_\_\_\_ alle \_\_\_\_ . \_\_\_\_  
e dalle \_\_\_\_ . \_\_\_\_ alle \_\_\_\_ . \_\_\_\_  
e dalle \_\_\_\_ . \_\_\_\_ alle \_\_\_\_ . \_\_\_\_

2501

2502

2503

  

2.6 Ripensando agli ultimi dodici mesi, in che misura si è sentito disturbato o molestato dal rumore di una delle seguenti fonti durante la notte, quando voleva dormire?

per nulla          poco          abbastanza          molto          moltissimo

Traffico stradale

Traffico ferroviario

Traffico aereo

Vicinato

Altre fonti: .....

2601

2602

2603

2604

2605/6

  

2.7 Da quale fonte di rumore si è sentito in generale maggiormente disturbato o molestato negli ultimi dodici mesi nel luogo in cui abita?

☐ Traffico stradale

☐ Traffico ferroviario

☐ Traffico aereo

☐ Altre fonti di rumore, in particolare: .....

☐ Industria e artigianato

☐ Vicinato

☐ Bar/impianti sportivi/manifestazioni, ecc.

2701

2702

|      |                                                                                                                                                                                                                                                                                                                                      |                                    |                         |                                |                       |      |
|------|--------------------------------------------------------------------------------------------------------------------------------------------------------------------------------------------------------------------------------------------------------------------------------------------------------------------------------------|------------------------------------|-------------------------|--------------------------------|-----------------------|------|
| 2.8  | Il prossimo punto concerne la sua sensibilità al rumore. È d'accordo con la seguente affermazione?                                                                                                                                                                                                                                   |                                    |                         |                                |                       |      |
|      |                                                                                                                                                                                                                                                                                                                                      | <b>assolutamente<br/>d'accordo</b> |                         | <b>per nulla<br/>d'accordo</b> |                       |      |
|      | ▪ Sono sensibile ai rumori                                                                                                                                                                                                                                                                                                           | <input type="radio"/>              | <input type="radio"/>   | <input type="radio"/>          | 2801                  |      |
| 2.9  | Legga le seguenti 13 affermazioni nell'ordine proposto e cerchi di immedesimarsi nella situazione, apponendo una crocetta sulla risposta che ritiene più appropriata.                                                                                                                                                                |                                    |                         |                                |                       |      |
|      |                                                                                                                                                                                                                                                                                                                                      | <b>vero</b>                        | <b>abbast.<br/>vero</b> | <b>abbast.<br/>falso</b>       | <b>falso</b>          |      |
|      | ▪ Ho bisogno un ambiente assolutamente tranquillo per riuscire a fare una buona notte di sonno                                                                                                                                                                                                                                       | <input type="radio"/>              | <input type="radio"/>   | <input type="radio"/>          | <input type="radio"/> | 2901 |
|      | ▪ Ho bisogno di silenzio per svolgere nuovi compiti                                                                                                                                                                                                                                                                                  | <input type="radio"/>              | <input type="radio"/>   | <input type="radio"/>          | <input type="radio"/> | 2902 |
|      | ▪ A casa mi abituo rapidamente al rumore                                                                                                                                                                                                                                                                                             | <input type="radio"/>              | <input type="radio"/>   | <input type="radio"/>          | <input type="radio"/> | 2903 |
|      | ▪ Mi innervosisco molto se qualcuno parla quando cerco di prendere sonno                                                                                                                                                                                                                                                             | <input type="radio"/>              | <input type="radio"/>   | <input type="radio"/>          | <input type="radio"/> | 2904 |
|      | ▪ Sono molto sensibile ai rumori del vicinato                                                                                                                                                                                                                                                                                        | <input type="radio"/>              | <input type="radio"/>   | <input type="radio"/>          | <input type="radio"/> | 2905 |
|      | ▪ Non riesco a procedere con il lavoro se intorno a me ci sono persone molto rumorose                                                                                                                                                                                                                                                | <input type="radio"/>              | <input type="radio"/>   | <input type="radio"/>          | <input type="radio"/> | 2906 |
|      | ▪ Sono sensibile ai rumori                                                                                                                                                                                                                                                                                                           | <input type="radio"/>              | <input type="radio"/>   | <input type="radio"/>          | <input type="radio"/> | 2907 |
|      | ▪ Le mie prestazioni sono molto peggiori quando sono in un ambiente molto rumoroso                                                                                                                                                                                                                                                   | <input type="radio"/>              | <input type="radio"/>   | <input type="radio"/>          | <input type="radio"/> | 2908 |
|      | ▪ Dopo una nottata molto rumorosa non mi sento ben riposato                                                                                                                                                                                                                                                                          | <input type="radio"/>              | <input type="radio"/>   | <input type="radio"/>          | <input type="radio"/> | 2909 |
|      | ▪ Non mi infastidirebbe abitare in una strada rumorosa                                                                                                                                                                                                                                                                               | <input type="radio"/>              | <input type="radio"/>   | <input type="radio"/>          | <input type="radio"/> | 2910 |
|      | ▪ Pur di abitare in una zona silenziosa accetterei altri svantaggi                                                                                                                                                                                                                                                                   | <input type="radio"/>              | <input type="radio"/>   | <input type="radio"/>          | <input type="radio"/> | 2911 |
|      | ▪ Ho bisogno di silenzio assoluto per svolgere lavori impegnativi                                                                                                                                                                                                                                                                    | <input type="radio"/>              | <input type="radio"/>   | <input type="radio"/>          | <input type="radio"/> | 2912 |
|      | ▪ Mi addormento facilmente anche quando c'è rumore                                                                                                                                                                                                                                                                                   | <input type="radio"/>              | <input type="radio"/>   | <input type="radio"/>          | <input type="radio"/> | 2913 |
| 2.10 | Pensi ora al suo atteggiamento nei confronti dell'ambiente e del rumore, e risponda il più spontaneamente possibile.<br>Cosa conta di più per lei?<br><input type="radio"/> Una piazza economica forte / un libero sviluppo economico<br><input type="radio"/> Tranquillità e protezione dell'ambiente / requisiti ambientali severi |                                    |                         |                                | 2100                  |      |

### 3. Impiego del tempo, sonno e qualità del sonno

|     |                                                                                         |                                                         |      |
|-----|-----------------------------------------------------------------------------------------|---------------------------------------------------------|------|
| 3.1 | Di solito, in un giorno medio (lu-ve) a che ora esce di casa (la mattina)?              | alle ____ . ____                                        | 3101 |
|     | E a che ora rincasa solitamente?                                                        | alle ____ . ____                                        | 3102 |
| 3.2 | Sull'arco di un mese, quante volte lavora di notte, tra le 23.00 e le 6.00?             |                                                         |      |
|     | <input type="radio"/> Mai                                                               | <input type="radio"/> Numero di notti in un mese: ..... | 3201 |
| 3.3 | Nelle ultime quattro settimane quante volte ha assunto sonniferi prescritti dal medico? |                                                         |      |
|     | <input type="radio"/> mai                                                               | <input type="radio"/> meno di una volta a settimana     |      |
|     | <input type="radio"/> una o due volte a settimana                                       | <input type="radio"/> tre o più volte a settimana       | 3501 |

## Questionario per lo studio SiRENE

|     |                                                                                                                                                                                                                                                                                                                                                                                                                                                                                                                                                                                                                                                                                                                                                                                                                                                                                                                                                                                                                                                                                                                                                                                                                                                                                                                                                                                                                                                                                                                                                                                                                                                                                                                                                                                                                                                                          |                                                              |
|-----|--------------------------------------------------------------------------------------------------------------------------------------------------------------------------------------------------------------------------------------------------------------------------------------------------------------------------------------------------------------------------------------------------------------------------------------------------------------------------------------------------------------------------------------------------------------------------------------------------------------------------------------------------------------------------------------------------------------------------------------------------------------------------------------------------------------------------------------------------------------------------------------------------------------------------------------------------------------------------------------------------------------------------------------------------------------------------------------------------------------------------------------------------------------------------------------------------------------------------------------------------------------------------------------------------------------------------------------------------------------------------------------------------------------------------------------------------------------------------------------------------------------------------------------------------------------------------------------------------------------------------------------------------------------------------------------------------------------------------------------------------------------------------------------------------------------------------------------------------------------------------|--------------------------------------------------------------|
| 3.4 | Le domande che seguono si riferiscono alle sue abitudini nel dormire. Provi a rispondere nel modo più preciso possibile, secondo le sue abitudini (diurne e notturne) delle ultime quattro settimane.<br>Di regola, dopo essersi coricato, a che ora circa spegne la luce?<br><ul style="list-style-type: none"> <li>in settimana (do-gi): alle ____ . ____</li> <li>nel fine settimana (ve-sa): alle ____ . ____</li> </ul> e a che ora si sveglia il mattino?<br><ul style="list-style-type: none"> <li>in settimana (lu-ve): alle ____ . ____</li> <li>nel fine settimana (sa-do): alle ____ . ____</li> </ul>                                                                                                                                                                                                                                                                                                                                                                                                                                                                                                                                                                                                                                                                                                                                                                                                                                                                                                                                                                                                                                                                                                                                                                                                                                                        | 3301<br>3302<br>3303<br>3304                                 |
| 3.4 | Quante volte le accade...<br><div style="text-align: center;">mai      raramente      qualche volta      spesso</div> <ul style="list-style-type: none"> <li>... di addormentarsi male _____ <input type="radio"/> _____ <input type="radio"/> _____ <input type="radio"/> _____ <input type="radio"/></li> <li>... di avere un sonno agitato _____ <input type="radio"/> _____ <input type="radio"/> _____ <input type="radio"/> _____ <input type="radio"/></li> <li>... di svegliarsi più volte di notte _____ <input type="radio"/> _____ <input type="radio"/> _____ <input type="radio"/> _____ <input type="radio"/></li> <li>... di svegliarsi troppo presto al mattino _____ <input type="radio"/> _____ <input type="radio"/> _____ <input type="radio"/> _____ <input type="radio"/></li> <li>... non sentirsi riposato al risveglio _____ <input type="radio"/> _____ <input type="radio"/> _____ <input type="radio"/> _____ <input type="radio"/></li> <li>... svegliarsi o essere disturbato nel sonno da rumori in casa (p. es. partner, bambini) _____ <input type="radio"/> _____ <input type="radio"/> _____ <input type="radio"/> _____ <input type="radio"/></li> </ul>                                                                                                                                                                                                                                                                                                                                                                                                                                                                                                                                                                                                                                                                             | 3401<br>3402<br>3403<br>3404<br>3405<br>3406                 |
| 3.6 | Negli ultimi tre mesi ha dormito con la finestra della stanza da letto prevalentemente?<br><input type="radio"/> chiusa <input type="radio"/> spalancata <input type="radio"/> semiaperta / socchiusa<br>Se ha risposto «spalancata» o «semiaperta», per quale motivo? <input type="radio"/> arieggiare <input type="radio"/> rinfrescare <input type="radio"/> altro<br>Se ha risposto «chiusa», per quale motivo? <input type="radio"/> rumore (esterno) <input type="radio"/> dispersione di calore <input type="radio"/> altro                                                                                                                                                                                                                                                                                                                                                                                                                                                                                                                                                                                                                                                                                                                                                                                                                                                                                                                                                                                                                                                                                                                                                                                                                                                                                                                                       | 3601<br>3602<br>3603                                         |
| 3.7 | Con che frequenza fa capo ai seguenti provvedimenti per addormentarsi quando non riesce a prendere sonno a causa del rumore causato dal traffico (stradale, ferroviario o aereo)?<br><div style="text-align: center;">mai      di rado      spesso      sempre</div> <div style="text-align: center;">talvolta      molto spesso</div> <ul style="list-style-type: none"> <li>Tappi per le orecchie _____ <input type="radio"/> _____ <input type="radio"/> _____ <input type="radio"/> _____ <input type="radio"/> _____ <input type="radio"/></li> <li>Chiudere le finestre _____ <input type="radio"/> _____ <input type="radio"/> _____ <input type="radio"/> _____ <input type="radio"/> _____ <input type="radio"/></li> <li>Modificare gli orari del sonno _____ <input type="radio"/> _____ <input type="radio"/> _____ <input type="radio"/> _____ <input type="radio"/> _____ <input type="radio"/></li> <li>Dormire altrove / in un'altra stanza _____ <input type="radio"/> _____ <input type="radio"/> _____ <input type="radio"/> _____ <input type="radio"/> _____ <input type="radio"/></li> <li>Assunzione di tranquillanti / sonniferi _____ <input type="radio"/> _____ <input type="radio"/> _____ <input type="radio"/> _____ <input type="radio"/> _____ <input type="radio"/></li> <li>Bere alcol _____ <input type="radio"/> _____ <input type="radio"/> _____ <input type="radio"/> _____ <input type="radio"/> _____ <input type="radio"/></li> <li>Mangiare / sgranocchiare qualcosa _____ <input type="radio"/> _____ <input type="radio"/> _____ <input type="radio"/> _____ <input type="radio"/> _____ <input type="radio"/></li> <li>Leggere, guardare la TV, ascoltare musica... _____ <input type="radio"/> _____ <input type="radio"/> _____ <input type="radio"/> _____ <input type="radio"/> _____ <input type="radio"/></li> </ul> | 3701<br>3702<br>3703<br>3704<br>3705<br>3706<br>3707<br>3708 |

## 4. Comportamento e personalità

|     |                                                                                                                                                                                                                                                                                                                                                                                                                                                                                                                                                                                                                                                                                                                                                                                                                                                                                                                                                                                                                  |                                              |
|-----|------------------------------------------------------------------------------------------------------------------------------------------------------------------------------------------------------------------------------------------------------------------------------------------------------------------------------------------------------------------------------------------------------------------------------------------------------------------------------------------------------------------------------------------------------------------------------------------------------------------------------------------------------------------------------------------------------------------------------------------------------------------------------------------------------------------------------------------------------------------------------------------------------------------------------------------------------------------------------------------------------------------|----------------------------------------------|
| 4.1 | Legga le affermazioni elencate di seguito e per ognuna indichi in che misura si applica alla sua situazione, vale a dire in che misura rispecchia il suo modo di pensare e agire.<br>(cerchiare il numero che ritiene più appropriato)<br><div style="text-align: center;">non corrisponde affatto      corrisponde pienamente</div> <ul style="list-style-type: none"> <li>Quando ho dei progetti, li seguo _____ 1 _____ 2 _____ 3 _____ 4 _____ 5 _____ 6 _____ 7</li> <li>Di solito riesco sempre nei miei intenti _____ 1 _____ 2 _____ 3 _____ 4 _____ 5 _____ 6 _____ 7</li> <li>Provare interesse per diverse cose è di grande importanza per me _____ 1 _____ 2 _____ 3 _____ 4 _____ 5 _____ 6 _____ 7</li> <li>So gestire diverse cose contemporaneamente _____ 1 _____ 2 _____ 3 _____ 4 _____ 5 _____ 6 _____ 7</li> <li>Sono determinato _____ 1 _____ 2 _____ 3 _____ 4 _____ 5 _____ 6 _____ 7</li> <li>Ho parecchi interessi _____ 1 _____ 2 _____ 3 _____ 4 _____ 5 _____ 6 _____ 7</li> </ul> | 4101<br>4102<br>4103<br>4104<br>4105<br>4106 |
|-----|------------------------------------------------------------------------------------------------------------------------------------------------------------------------------------------------------------------------------------------------------------------------------------------------------------------------------------------------------------------------------------------------------------------------------------------------------------------------------------------------------------------------------------------------------------------------------------------------------------------------------------------------------------------------------------------------------------------------------------------------------------------------------------------------------------------------------------------------------------------------------------------------------------------------------------------------------------------------------------------------------------------|----------------------------------------------|

|                                                                                                                                                                                               |      |                               |                       |                       |                           |                       |                       |   |
|-----------------------------------------------------------------------------------------------------------------------------------------------------------------------------------------------|------|-------------------------------|-----------------------|-----------------------|---------------------------|-----------------------|-----------------------|---|
|                                                                                                                                                                                               |      | non<br>corrisponde<br>affatto |                       |                       | corrisponde<br>pienamente |                       |                       |   |
|                                                                                                                                                                                               | 4107 |                               |                       |                       |                           |                       |                       |   |
| ▪ Trovo spesso qualcosa su cui ridere                                                                                                                                                         | 4108 | 1                             | 2                     | 3                     | 4                         | 5                     | 6                     | 7 |
| ▪ Di solito riesco a considerare una situazione da tutti i lati                                                                                                                               | 4109 | 1                             | 2                     | 3                     | 4                         | 5                     | 6                     | 7 |
| ▪ Riesco a impormi di fare cose che in realtà non ho voglia di fare                                                                                                                           | 4110 | 1                             | 2                     | 3                     | 4                         | 5                     | 6                     | 7 |
| ▪ Trovo energie sufficienti per fare tutto quello che devo fare                                                                                                                               |      | 1                             | 2                     | 3                     | 4                         | 5                     | 6                     | 7 |
| 4.2 Utilizzando una scala da 1 a 6, come valuta la sua capacità di gestire lo stress? (1 = "So gestire perfettamente lo stress"; 6 = "Lo stress mi consuma")                                  |      |                               |                       |                       |                           |                       |                       |   |
|                                                                                                                                                                                               | 4201 | 1                             | 2                     | 3                     | 4                         | 5                     | 6                     |   |
|                                                                                                                                                                                               |      | <input type="radio"/>         | <input type="radio"/> | <input type="radio"/> | <input type="radio"/>     | <input type="radio"/> | <input type="radio"/> |   |
| Nel anno passato come valuterebbe la quantità di stress nella sua vita (a casa e sul lavoro)? (1 = "nessuno stress", 6 = "stress molto forte")                                                |      |                               |                       |                       |                           |                       |                       |   |
|                                                                                                                                                                                               | 4202 | 1                             | 2                     | 3                     | 4                         | 5                     | 6                     |   |
|                                                                                                                                                                                               |      | <input type="radio"/>         | <input type="radio"/> | <input type="radio"/> | <input type="radio"/>     | <input type="radio"/> | <input type="radio"/> |   |
| 4.3 In che misura le seguenti affermazioni si applicano al suo modo di pensare e agire in <u>situazioni spiacevoli o difficili</u> vissute in passato? Indichi una risposta per affermazione. |      |                               |                       |                       |                           |                       |                       |   |
|                                                                                                                                                                                               |      |                               | no                    | un po'                | abba-<br>stanza           | molto                 |                       |   |
| ▪ Mi sono buttato nel lavoro o in attività varie per pensare ad altro                                                                                                                         | 4301 |                               | <input type="radio"/> | <input type="radio"/> | <input type="radio"/>     | <input type="radio"/> |                       |   |
| ▪ Mi sono focalizzato su ciò che desidero cambiare della situazione in cui mi trovo                                                                                                           | 4302 |                               | <input type="radio"/> | <input type="radio"/> | <input type="radio"/>     | <input type="radio"/> |                       |   |
| ▪ Mi sono autoconvinto che tutto ciò non è vero                                                                                                                                               | 4303 |                               | <input type="radio"/> | <input type="radio"/> | <input type="radio"/>     | <input type="radio"/> |                       |   |
| ▪ Ho ricevuto incoraggiamenti e sostegno da altri                                                                                                                                             | 4304 |                               | <input type="radio"/> | <input type="radio"/> | <input type="radio"/>     | <input type="radio"/> |                       |   |
| ▪ Ho smesso di pensare a questa situazione                                                                                                                                                    | 4305 |                               | <input type="radio"/> | <input type="radio"/> | <input type="radio"/>     | <input type="radio"/> |                       |   |
| ▪ Mi sono dato da fare per migliorare la situazione                                                                                                                                           | 4306 |                               | <input type="radio"/> | <input type="radio"/> | <input type="radio"/>     | <input type="radio"/> |                       |   |
| ▪ Non ho voluto credere che ciò possa succedermi                                                                                                                                              | 4307 |                               | <input type="radio"/> | <input type="radio"/> | <input type="radio"/>     | <input type="radio"/> |                       |   |
| ▪ Ho lasciato libero corso ai miei sentimenti                                                                                                                                                 | 4308 |                               | <input type="radio"/> | <input type="radio"/> | <input type="radio"/>     | <input type="radio"/> |                       |   |
| ▪ Ho chiesto aiuto e consigli ad altre persone                                                                                                                                                | 4309 |                               | <input type="radio"/> | <input type="radio"/> | <input type="radio"/>     | <input type="radio"/> |                       |   |
| ▪ Ho cercato di vedere il lato positivo delle cose                                                                                                                                            | 4310 |                               | <input type="radio"/> | <input type="radio"/> | <input type="radio"/>     | <input type="radio"/> |                       |   |
| ▪ Ho cercato di pensare cosa fare                                                                                                                                                             | 4311 |                               | <input type="radio"/> | <input type="radio"/> | <input type="radio"/>     | <input type="radio"/> |                       |   |
| ▪ Qualcuno mi ha consolato e mostrato comprensione nei miei confronti                                                                                                                         | 4312 |                               | <input type="radio"/> | <input type="radio"/> | <input type="radio"/>     | <input type="radio"/> |                       |   |
| ▪ Ho rinunciato a gestire la situazione                                                                                                                                                       | 4313 |                               | <input type="radio"/> | <input type="radio"/> | <input type="radio"/>     | <input type="radio"/> |                       |   |
| ▪ Ho cercato di ricavare gli aspetti positivi di quanto mi è accaduto                                                                                                                         | 4314 |                               | <input type="radio"/> | <input type="radio"/> | <input type="radio"/>     | <input type="radio"/> |                       |   |
| ▪ Ho fatto qualcosa per non pensare a questa situazione                                                                                                                                       | 4315 |                               | <input type="radio"/> | <input type="radio"/> | <input type="radio"/>     | <input type="radio"/> |                       |   |
| ▪ Mi sono rassegnato al fatto che ciò è accaduto                                                                                                                                              | 4316 |                               | <input type="radio"/> | <input type="radio"/> | <input type="radio"/>     | <input type="radio"/> |                       |   |
| ▪ Ho mostrato chiaramente il mio malessere                                                                                                                                                    | 4317 |                               | <input type="radio"/> | <input type="radio"/> | <input type="radio"/>     | <input type="radio"/> |                       |   |
| ▪ Ho cercato di ottenere aiuto o consigli da altre persone                                                                                                                                    | 4318 |                               | <input type="radio"/> | <input type="radio"/> | <input type="radio"/>     | <input type="radio"/> |                       |   |
| ▪ Ho imparato a convivere con questa situazione                                                                                                                                               | 4319 |                               | <input type="radio"/> | <input type="radio"/> | <input type="radio"/>     | <input type="radio"/> |                       |   |
| ▪ Ho riflettuto a lungo su quale fosse la soluzione migliore                                                                                                                                  | 4320 |                               | <input type="radio"/> | <input type="radio"/> | <input type="radio"/>     | <input type="radio"/> |                       |   |

## Questionario per lo studio SiRENE

|     |                                                                                                                                                                                                                                                                                                                                                                                                                                                                                                                                                                                                                                                                                                                                                                              |                              |
|-----|------------------------------------------------------------------------------------------------------------------------------------------------------------------------------------------------------------------------------------------------------------------------------------------------------------------------------------------------------------------------------------------------------------------------------------------------------------------------------------------------------------------------------------------------------------------------------------------------------------------------------------------------------------------------------------------------------------------------------------------------------------------------------|------------------------------|
| 4.4 | Le affermazioni seguenti possono essere più o meno pertinenti nel suo caso. Indichi per favore in che misura queste si applicano alla sua situazione personale.                                                                                                                                                                                                                                                                                                                                                                                                                                                                                                                                                                                                              |                              |
|     | <p style="text-align: center;"> <b>piuttosto falso    abbast. falso    vero    piuttosto vero    vero</b> </p>                                                                                                                                                                                                                                                                                                                                                                                                                                                                                                                                                                                                                                                               |                              |
|     | <ul style="list-style-type: none"> <li>▪ Ho il controllo della mia vita <input type="radio"/> <input type="radio"/> <input type="radio"/> <input type="radio"/> <input type="radio"/></li> <li>▪ Se mi applico, avrò anch'io successo <input type="radio"/> <input type="radio"/> <input type="radio"/> <input type="radio"/> <input type="radio"/></li> <li>▪ Nella vita privata e nel lavoro: la mia vita è determinata in gran parte dagli altri <input type="radio"/> <input type="radio"/> <input type="radio"/> <input type="radio"/> <input type="radio"/></li> <li>▪ Spesso il destino ci mette lo zampino e manda all'aria i miei progetti <input type="radio"/> <input type="radio"/> <input type="radio"/> <input type="radio"/> <input type="radio"/></li> </ul> | 4401<br>4402<br>4403<br>4404 |

### 5. Stato di salute generale e comportamento in materia di salute

|     |                                                                                                                                                                                                                                                                                                                                                                                                                                                                                                                                                                                                                                                                                                                                                                                             |                                      |
|-----|---------------------------------------------------------------------------------------------------------------------------------------------------------------------------------------------------------------------------------------------------------------------------------------------------------------------------------------------------------------------------------------------------------------------------------------------------------------------------------------------------------------------------------------------------------------------------------------------------------------------------------------------------------------------------------------------------------------------------------------------------------------------------------------------|--------------------------------------|
| 5.1 | La sua altezza: ..... cm.                      Il suo peso: ..... kg.                                                                                                                                                                                                                                                                                                                                                                                                                                                                                                                                                                                                                                                                                                                       | 5101/2                               |
| 5.2 | Come va in generale la sua salute?                                                                                                                                                                                                                                                                                                                                                                                                                                                                                                                                                                                                                                                                                                                                                          |                                      |
|     | <input type="radio"/> molto bene <input type="radio"/> bene <input type="radio"/> discretamente <input type="radio"/> male <input type="radio"/> molto male                                                                                                                                                                                                                                                                                                                                                                                                                                                                                                                                                                                                                                 | 5201                                 |
|     | Il medico non le ha mai diagnosticato il diabete? <input type="radio"/> sì <input type="radio"/> no                                                                                                                                                                                                                                                                                                                                                                                                                                                                                                                                                                                                                                                                                         | 5202                                 |
|     | Il medico non le ha mai diagnosticato l'ipertensione? <input type="radio"/> sì <input type="radio"/> no                                                                                                                                                                                                                                                                                                                                                                                                                                                                                                                                                                                                                                                                                     | 5203                                 |
|     | Ha problemi di udito? <input type="radio"/> sì (→ <input type="radio"/> porto un apparecchio acustico) <input type="radio"/> no                                                                                                                                                                                                                                                                                                                                                                                                                                                                                                                                                                                                                                                             | 5204                                 |
| 5.3 | Pensi ora al suo stato d'animo e a come si è sentito nelle <u>ultime quattro settimane</u> . Indichi per ogni affermazione la risposta che meglio rispecchia la sua condizione.<br>Nelle ultime quattro settimane, quante volte le è capitato di sentirsi...                                                                                                                                                                                                                                                                                                                                                                                                                                                                                                                                |                                      |
|     | <p style="text-align: center;"> <b>mai                      quasi mai                      abbast. spesso                      quasi sempre                      sempre</b> </p>                                                                                                                                                                                                                                                                                                                                                                                                                                                                                                                                                                                                            |                                      |
|     | <ul style="list-style-type: none"> <li>▪ Molto nervoso? <input type="radio"/> <input type="radio"/> <input type="radio"/> <input type="radio"/> <input type="radio"/></li> <li>▪ Così giù di morale che niente avrebbe potuto tirarla su? <input type="radio"/> <input type="radio"/> <input type="radio"/> <input type="radio"/> <input type="radio"/></li> <li>▪ Calmo e sereno? <input type="radio"/> <input type="radio"/> <input type="radio"/> <input type="radio"/> <input type="radio"/></li> <li>▪ Scoraggiato e triste? <input type="radio"/> <input type="radio"/> <input type="radio"/> <input type="radio"/> <input type="radio"/></li> <li>▪ Felice? <input type="radio"/> <input type="radio"/> <input type="radio"/> <input type="radio"/> <input type="radio"/></li> </ul> | 5301<br>5302<br>5303<br>5304<br>5305 |
| 5.4 | Le domande che seguono riguardano il suo comportamento in materia di salute e l'attività fisica.                                                                                                                                                                                                                                                                                                                                                                                                                                                                                                                                                                                                                                                                                            |                                      |
|     | Attualmente (riferito all'ultimo mese) fuma sigarette?                                                                                                                                                                                                                                                                                                                                                                                                                                                                                                                                                                                                                                                                                                                                      |                                      |
|     | <input type="radio"/> sì (→ in media fumo ..... sigarette al giorno)<br><input type="radio"/> no (→ <input type="radio"/> ho fumato in passato, ma ho smesso da ..... anni)<br><input type="radio"/> non ho mai fumato                                                                                                                                                                                                                                                                                                                                                                                                                                                                                                                                                                      | 5401/2<br>5403                       |
|     | Nell'ultima settimana, quanto tempo libero ha dedicato a un'attività fisica, arrivando a sudare (p. es. jogging, ciclismo ecc.)?<br>_____ ore _____ minuti <b>nell'ultima settimana</b>                                                                                                                                                                                                                                                                                                                                                                                                                                                                                                                                                                                                     | 5404                                 |
|     | Nell'ultima settimana, per quanto tempo ha praticato attività motorie che le hanno causato almeno per poco il fiato corto (p. es. marcia rapida, escursioni, ballare, giardinaggio o sport vari)?<br>_____ ore _____ minuti <b>nell'ultima settimana</b>                                                                                                                                                                                                                                                                                                                                                                                                                                                                                                                                    | 5405                                 |

## 6. Situazione lavorativa e professionale

|                                                                                                                                                                                                                                                                                                                                                                                                                                                                                                                                                                                                                                                                                                                                                                                                                                                                                                                                                                                                                                                                                                                                                                                                                                                                                                                                                                                                                                                                                         |                                                   |
|-----------------------------------------------------------------------------------------------------------------------------------------------------------------------------------------------------------------------------------------------------------------------------------------------------------------------------------------------------------------------------------------------------------------------------------------------------------------------------------------------------------------------------------------------------------------------------------------------------------------------------------------------------------------------------------------------------------------------------------------------------------------------------------------------------------------------------------------------------------------------------------------------------------------------------------------------------------------------------------------------------------------------------------------------------------------------------------------------------------------------------------------------------------------------------------------------------------------------------------------------------------------------------------------------------------------------------------------------------------------------------------------------------------------------------------------------------------------------------------------|---------------------------------------------------|
| <p>6.1 Le chiediamo ora alcune informazioni sulla sua situazione lavorativa, professionale o formativa. Attualmente svolge un'attività lavorativa?</p> <p> <input type="radio"/> sì, a tempo pieno    <input type="radio"/> sì, a tempo parziale .....%    <input type="radio"/> in formazione (scuola, studi, apprendistato)<br/> <input type="radio"/> non lavoro, sono in cerca di un impiego    <input type="radio"/> titolare di una rendita, pensionato<br/> <input type="radio"/> non lavoro e non sono in cerca di un impiego    <input type="radio"/> altro<br/>             (p. es. casalinga)       </p> <p>In caso affermativo: che lavoro svolge attualmente? <i>(essere il più precisi possibile)</i></p> <p>.....</p>                                                                                                                                                                                                                                                                                                                                                                                                                                                                                                                                                                                                                                                                                                                                                    | <p>6101<br/>6102<br/><br/><br/><br/><br/>6103</p> |
| <p>6.2 Che professione hanno svolto sua madre e suo padre quando era bambino?</p> <p>P. del padre: ..... P. della madre: .....</p>                                                                                                                                                                                                                                                                                                                                                                                                                                                                                                                                                                                                                                                                                                                                                                                                                                                                                                                                                                                                                                                                                                                                                                                                                                                                                                                                                      | <p>6201<br/>6202</p>                              |
| <p>6.3 Titolo conseguito (livello più alto):</p> <p> <input type="radio"/> Scuola elementare<br/> <input type="radio"/> Scuola dell'obbligo: 9 anni (scuola media, scuola consortile, ecc.)<br/> <input type="radio"/> Formazione transitoria: pretirocinio, decimo anno scolastico, ecc.<br/> <input type="radio"/> Scuola professionale, scuola specializzata o simile<br/> <input type="radio"/> Tirocino professionale con attestato federale di capacità / attestato federale di formazione<br/> <input type="radio"/> Maturità professionale o specializzata<br/> <input type="radio"/> Maturità liceale, scuola magistrale, maturità per adulti<br/> <input type="radio"/> Formazione professionale superiore con attestato professionale federale, diploma di maestria<br/> <input type="radio"/> Scuola specializzata superiore di tecnica (SSST), scuola tecnica (ST), scuola superiore di economia aziendale (SSEA) o scuola superiore di informatica di gestione (SSIG)<br/> <input type="radio"/> Scuola tecnica superiore (STS), scuola superiore per i quadri dell'economia e dell'amministrazione (SSQEA), scuola superiore di arti applicate (SSAA) o equivalente<br/> <input type="radio"/> Bachelor (università, ETH, scuola universitaria professionale, alta scuola pedagogica)<br/> <input type="radio"/> Master, licenza o diploma (università, ETH, scuola universitaria professionale, alta scuola pedagogica)<br/> <input type="radio"/> Dottorato       </p> | <p>6301</p>                                       |

Il sondaggio è quasi terminato, la preghiamo di rispondere ancora alle seguenti domande:

|                                                                                                                                                                                                                                                                                                                                                              |           |
|--------------------------------------------------------------------------------------------------------------------------------------------------------------------------------------------------------------------------------------------------------------------------------------------------------------------------------------------------------------|-----------|
| <p> Desidera partecipare all'estrazione di tre iPad mini Retina Apple?</p> <p><input type="radio"/> sì    <input type="radio"/> no</p>                                                                                                                                    | <p>P1</p> |
| <p>Sarebbe interessato a partecipare volontariamente (dietro compenso) a uno degli studi scientifici seguenti?</p> <p> <input type="radio"/> sì, a esperimenti nel laboratorio del sonno presso il Centro di cronobiologia a Basilea<br/> <input type="radio"/> sì, a misurazioni del rumore presso la mia abitazione    <input type="radio"/> no       </p> | <p>P2</p> |
| <p>Desidera essere informato in merito ai risultati dello studio SiRENE?    <input type="radio"/> sì    <input type="radio"/> no</p>                                                                                                                                                                                                                         | <p>P3</p> |
| <p>Ci autorizza eventualmente a riprendere contatto con lei in futuro per un'ulteriore sondaggio ?    <input type="radio"/> sì    <input type="radio"/> no</p>                                                                                                                                                                                               | <p>P4</p> |
| <p>Se ha risposto «sì» a una o più domande, indichi il suo recapito postale, indirizzo e-mail o numero di telefono al quale possiamo contattarla:</p> <p>.....</p> <p>.....</p>                                                                                                                                                                              | <p>P5</p> |

😊 La ringraziamo per la sua collaborazione! 😊

## Questionario per lo studio SiRENE

Indirizzo cui inviare il questionario:

Bundesamt für Umwelt BAFU  
Abt. Lärm und NIS  
SiRENE-Studie / BMK  
3003 Bern

Fax: 058 462 17 57  
Email: [mark.brink@bafu.admin.ch](mailto:mark.brink@bafu.admin.ch)

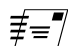

Utilizzi la busta preaffrancata per rispedire il questionario

Commenti:



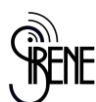

# Questionnaire for the SiRENE study\*

*\* this is not the original questionnaire used for the survey, but the English translation of the original German version and provided for information purposes only. Layout and pagination of this questionnaire may differ from the original German version.  
(c) Federal Office for the Environment, CH-3003 Bern, Switzerland*

This questionnaire is divided into the following sub-sections: "Personal information"; "Disturbances and annoyance due to noise"; "Time use, sleep and sleep quality"; "Behavior and personality"; "Health and health behavior"; "Employment situation and occupation". Answering as many questions as possible is very important, even if one or more questions seem to have nothing to do with noise. Thank you very much.

*For questions with one or more round boxes, please tick the answer that best applies to you. If multiple answers apply, please tick all applicable answers. For questions with a dashed line (.....) or an underscore (\_\_\_\_), you can enter words or numbers. For numbers (1 2 3...), simply circle around the number that most applies.*

## 1. Personal information and residential situation

|     |                                                                                                                                                                                                                                                                                                                                                                                                                                                                                                                                                                                                                                                                                                                                                                                                                                                                                                                                                              |                                                      |
|-----|--------------------------------------------------------------------------------------------------------------------------------------------------------------------------------------------------------------------------------------------------------------------------------------------------------------------------------------------------------------------------------------------------------------------------------------------------------------------------------------------------------------------------------------------------------------------------------------------------------------------------------------------------------------------------------------------------------------------------------------------------------------------------------------------------------------------------------------------------------------------------------------------------------------------------------------------------------------|------------------------------------------------------|
| 1.1 | Today's date: .....                                                                                                                                                                                                                                                                                                                                                                                                                                                                                                                                                                                                                                                                                                                                                                                                                                                                                                                                          | 1101                                                 |
| 1.2 | Year of birth: ..... Sex: <input type="radio"/> female <input type="radio"/> male                                                                                                                                                                                                                                                                                                                                                                                                                                                                                                                                                                                                                                                                                                                                                                                                                                                                            | 1201/2                                               |
| 1.3 | Is the address in the cover letter the place where you live most of the time? <input type="radio"/> yes <input type="radio"/> no                                                                                                                                                                                                                                                                                                                                                                                                                                                                                                                                                                                                                                                                                                                                                                                                                             | 1301                                                 |
| 1.4 | How long have you been living in your current flat/house? ..... years<br>How old is the house you live in? ..... years <input type="radio"/> don't know                                                                                                                                                                                                                                                                                                                                                                                                                                                                                                                                                                                                                                                                                                                                                                                                      | 1401<br>1402                                         |
| 1.5 | Do you live: <input type="radio"/> alone <input type="radio"/> as a couple <input type="radio"/> in a flat share <input type="radio"/> other ( <input type="radio"/> with children)<br>Including yourself, how many persons<br>(incl. children) live in your household? ..... persons                                                                                                                                                                                                                                                                                                                                                                                                                                                                                                                                                                                                                                                                        | 1501<br>1502                                         |
| 1.6 | In what kind of apartment / house do you live? <input type="radio"/> Single-family house / <input type="radio"/> semi-detached house<br><input type="radio"/> row home<br><input type="radio"/> Apartment on the ground floor/parterre<br><input type="radio"/> Apartment on the .....floor<br><br>Does your dwelling have... <input type="checkbox"/> Soundproof windows? <input type="radio"/> yes <input type="radio"/> no <input type="radio"/> don't know<br><input type="checkbox"/> Sound absorbing fan? <input type="radio"/> yes <input type="radio"/> no <input type="radio"/> don't know<br><input type="checkbox"/> mechanical ventilation? <input type="radio"/> yes <input type="radio"/> no <input type="radio"/> don't know<br><br>Are you (co-)owner or tenant of your apartment or house?<br><input type="radio"/> House owner <input type="radio"/> Apartment owner <input type="radio"/> Cooperative member <input type="radio"/> Tenant | 1601<br>1602<br><br>1603<br>1604<br>1605<br><br>1606 |
| 1.7 | What is the orientation of your bedroom to the nearest busy road/street?<br><input type="radio"/> away from the street or to an inner courtyard<br><input type="radio"/> sideways to the street <input type="radio"/> facing the street<br><br>If your bedroom is facing the street, what is the name of that street?<br><br>Name of street: .....                                                                                                                                                                                                                                                                                                                                                                                                                                                                                                                                                                                                           | 1701<br>1702                                         |

## 2. Disturbances and annoyance due to noise

|                    |                                                                                                                                                                                                                                                                                                                                                                                                                                                                                                                                                                                                                                                                                                                                                                                              |                       |                       |                       |                       |      |           |  |                    |                       |                       |                       |                       |                       |      |               |                       |                       |                       |                       |                       |      |                |                       |                       |                       |                       |                       |      |  |
|--------------------|----------------------------------------------------------------------------------------------------------------------------------------------------------------------------------------------------------------------------------------------------------------------------------------------------------------------------------------------------------------------------------------------------------------------------------------------------------------------------------------------------------------------------------------------------------------------------------------------------------------------------------------------------------------------------------------------------------------------------------------------------------------------------------------------|-----------------------|-----------------------|-----------------------|-----------------------|------|-----------|--|--------------------|-----------------------|-----------------------|-----------------------|-----------------------|-----------------------|------|---------------|-----------------------|-----------------------|-----------------------|-----------------------|-----------------------|------|----------------|-----------------------|-----------------------|-----------------------|-----------------------|-----------------------|------|--|
| 2.1                | Thinking about the last twelve months at your home, overall, how much did noise from the road, from railways, or aircraft bother, disturb, or annoy you?                                                                                                                                                                                                                                                                                                                                                                                                                                                                                                                                                                                                                                     |                       |                       |                       |                       |      |           |  |                    |                       |                       |                       |                       |                       |      |               |                       |                       |                       |                       |                       |      |                |                       |                       |                       |                       |                       |      |  |
|                    | <table border="0"> <tr> <td></td> <td>not at all</td> <td>slightly</td> <td>moderately</td> <td>very</td> <td>extremely</td> <td></td> </tr> <tr> <td>Road traffic noise</td> <td><input type="radio"/></td> <td><input type="radio"/></td> <td><input type="radio"/></td> <td><input type="radio"/></td> <td><input type="radio"/></td> <td>2101</td> </tr> <tr> <td>Railway noise</td> <td><input type="radio"/></td> <td><input type="radio"/></td> <td><input type="radio"/></td> <td><input type="radio"/></td> <td><input type="radio"/></td> <td>2102</td> </tr> <tr> <td>Aircraft noise</td> <td><input type="radio"/></td> <td><input type="radio"/></td> <td><input type="radio"/></td> <td><input type="radio"/></td> <td><input type="radio"/></td> <td>2103</td> </tr> </table> |                       | not at all            | slightly              | moderately            | very | extremely |  | Road traffic noise | <input type="radio"/> | 2101 | Railway noise | <input type="radio"/> | 2102 | Aircraft noise | <input type="radio"/> | 2103 |  |
|                    | not at all                                                                                                                                                                                                                                                                                                                                                                                                                                                                                                                                                                                                                                                                                                                                                                                   | slightly              | moderately            | very                  | extremely             |      |           |  |                    |                       |                       |                       |                       |                       |      |               |                       |                       |                       |                       |                       |      |                |                       |                       |                       |                       |                       |      |  |
| Road traffic noise | <input type="radio"/>                                                                                                                                                                                                                                                                                                                                                                                                                                                                                                                                                                                                                                                                                                                                                                        | <input type="radio"/> | <input type="radio"/> | <input type="radio"/> | <input type="radio"/> | 2101 |           |  |                    |                       |                       |                       |                       |                       |      |               |                       |                       |                       |                       |                       |      |                |                       |                       |                       |                       |                       |      |  |
| Railway noise      | <input type="radio"/>                                                                                                                                                                                                                                                                                                                                                                                                                                                                                                                                                                                                                                                                                                                                                                        | <input type="radio"/> | <input type="radio"/> | <input type="radio"/> | <input type="radio"/> | 2102 |           |  |                    |                       |                       |                       |                       |                       |      |               |                       |                       |                       |                       |                       |      |                |                       |                       |                       |                       |                       |      |  |
| Aircraft noise     | <input type="radio"/>                                                                                                                                                                                                                                                                                                                                                                                                                                                                                                                                                                                                                                                                                                                                                                        | <input type="radio"/> | <input type="radio"/> | <input type="radio"/> | <input type="radio"/> | 2103 |           |  |                    |                       |                       |                       |                       |                       |      |               |                       |                       |                       |                       |                       |      |                |                       |                       |                       |                       |                       |      |  |

## Questionnaire for the SiRENE study

| <p>2.2 Thinking about the last twelve month, at your home, what number from 0 to 10 best shows how much you were bothered, disturbed, or annoyed by noise from the road, from railways, or aircraft? <i>(please circle the appropriate number)</i></p> <p>Road traffic noise 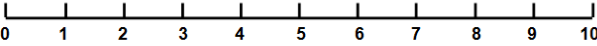</p> <p>Railway noise </p> <p>Aircraft noise </p> <p style="text-align: center;">Not at all <span style="float: right;">Extremely</span></p>                                                                                                                                                                                                                                                                                                                                                                                                                                                                                                                                                                                                                                                                                                                                                                                                                                                       | <p>2201</p> <p>2202</p> <p>2203</p> |                       |                       |                       |                       |           |                    |                       |                       |                       |                       |                       |               |                       |                       |                       |                       |                       |                |                       |                       |                       |                       |                       |                             |                       |                       |                       |                       |                       |              |                       |                       |                       |                       |                       |                                                               |
|---------------------------------------------------------------------------------------------------------------------------------------------------------------------------------------------------------------------------------------------------------------------------------------------------------------------------------------------------------------------------------------------------------------------------------------------------------------------------------------------------------------------------------------------------------------------------------------------------------------------------------------------------------------------------------------------------------------------------------------------------------------------------------------------------------------------------------------------------------------------------------------------------------------------------------------------------------------------------------------------------------------------------------------------------------------------------------------------------------------------------------------------------------------------------------------------------------------------------------------------------------------------------------------------------------------------------------------------------------------------------------------------------------------------------------------------------------------------------------------------------------------------------------------|-------------------------------------|-----------------------|-----------------------|-----------------------|-----------------------|-----------|--------------------|-----------------------|-----------------------|-----------------------|-----------------------|-----------------------|---------------|-----------------------|-----------------------|-----------------------|-----------------------|-----------------------|----------------|-----------------------|-----------------------|-----------------------|-----------------------|-----------------------|-----------------------------|-----------------------|-----------------------|-----------------------|-----------------------|-----------------------|--------------|-----------------------|-----------------------|-----------------------|-----------------------|-----------------------|---------------------------------------------------------------|
| <p>2.3 Are you particularly disturbed or annoyed by <u>road traffic noise at certain times</u> during the day or night?</p> <p><input type="radio"/> no <span style="margin-left: 150px;"><input type="radio"/> yes, from _____ : _____ to _____ : _____ o'clock</span></p> <p style="margin-left: 350px;">and from _____ : _____ to _____ : _____ o'clock</p> <p style="margin-left: 350px;">and from _____ : _____ to _____ : _____ o'clock</p>                                                                                                                                                                                                                                                                                                                                                                                                                                                                                                                                                                                                                                                                                                                                                                                                                                                                                                                                                                                                                                                                                     | <p>2301</p> <p>2302</p> <p>2303</p> |                       |                       |                       |                       |           |                    |                       |                       |                       |                       |                       |               |                       |                       |                       |                       |                       |                |                       |                       |                       |                       |                       |                             |                       |                       |                       |                       |                       |              |                       |                       |                       |                       |                       |                                                               |
| <p>2.4 Are you particularly disturbed or annoyed by <u>railway noise at certain times</u> during the day or night?</p> <p><input type="radio"/> no <span style="margin-left: 150px;"><input type="radio"/> yes, from _____ : _____ to _____ : _____ o'clock</span></p> <p style="margin-left: 350px;">and from _____ : _____ to _____ : _____ o'clock</p> <p style="margin-left: 350px;">and from _____ : _____ to _____ : _____ o'clock</p>                                                                                                                                                                                                                                                                                                                                                                                                                                                                                                                                                                                                                                                                                                                                                                                                                                                                                                                                                                                                                                                                                          | <p>2401</p> <p>2402</p> <p>2403</p> |                       |                       |                       |                       |           |                    |                       |                       |                       |                       |                       |               |                       |                       |                       |                       |                       |                |                       |                       |                       |                       |                       |                             |                       |                       |                       |                       |                       |              |                       |                       |                       |                       |                       |                                                               |
| <p>2.4 Are you particularly disturbed or annoyed by <u>aircraft noise at certain times</u> during the day or night?</p> <p><input type="radio"/> no <span style="margin-left: 150px;"><input type="radio"/> yes, from _____ : _____ to _____ : _____ o'clock</span></p> <p style="margin-left: 350px;">and from _____ : _____ to _____ : _____ o'clock</p> <p style="margin-left: 350px;">and from _____ : _____ to _____ : _____ o'clock</p>                                                                                                                                                                                                                                                                                                                                                                                                                                                                                                                                                                                                                                                                                                                                                                                                                                                                                                                                                                                                                                                                                         | <p>2501</p> <p>2502</p> <p>2503</p> |                       |                       |                       |                       |           |                    |                       |                       |                       |                       |                       |               |                       |                       |                       |                       |                       |                |                       |                       |                       |                       |                       |                             |                       |                       |                       |                       |                       |              |                       |                       |                       |                       |                       |                                                               |
| <p>2.6 Thinking about the last twelve months at your place, how much did noise from the below sources bother, disturb, or annoy you <u>at night, when you wanted to sleep?</u></p> <table border="0" style="width: 100%;"> <thead> <tr> <th></th> <th style="text-align: center;">not at all</th> <th style="text-align: center;">slightly</th> <th style="text-align: center;">moderately</th> <th style="text-align: center;">very</th> <th style="text-align: center;">extremely</th> </tr> </thead> <tbody> <tr> <td>Road traffic noise</td> <td><input type="radio"/></td> <td><input type="radio"/></td> <td><input type="radio"/></td> <td><input type="radio"/></td> <td><input type="radio"/></td> </tr> <tr> <td>Railway noise</td> <td><input type="radio"/></td> <td><input type="radio"/></td> <td><input type="radio"/></td> <td><input type="radio"/></td> <td><input type="radio"/></td> </tr> <tr> <td>Aircraft noise</td> <td><input type="radio"/></td> <td><input type="radio"/></td> <td><input type="radio"/></td> <td><input type="radio"/></td> <td><input type="radio"/></td> </tr> <tr> <td>Noise from the neighborhood</td> <td><input type="radio"/></td> <td><input type="radio"/></td> <td><input type="radio"/></td> <td><input type="radio"/></td> <td><input type="radio"/></td> </tr> <tr> <td>Other: .....</td> <td><input type="radio"/></td> <td><input type="radio"/></td> <td><input type="radio"/></td> <td><input type="radio"/></td> <td><input type="radio"/></td> </tr> </tbody> </table> |                                     | not at all            | slightly              | moderately            | very                  | extremely | Road traffic noise | <input type="radio"/> | Railway noise | <input type="radio"/> | Aircraft noise | <input type="radio"/> | Noise from the neighborhood | <input type="radio"/> | Other: ..... | <input type="radio"/> | <p>2601</p> <p>2602</p> <p>2603</p> <p>2604</p> <p>2605/6</p> |
|                                                                                                                                                                                                                                                                                                                                                                                                                                                                                                                                                                                                                                                                                                                                                                                                                                                                                                                                                                                                                                                                                                                                                                                                                                                                                                                                                                                                                                                                                                                                       | not at all                          | slightly              | moderately            | very                  | extremely             |           |                    |                       |                       |                       |                       |                       |               |                       |                       |                       |                       |                       |                |                       |                       |                       |                       |                       |                             |                       |                       |                       |                       |                       |              |                       |                       |                       |                       |                       |                                                               |
| Road traffic noise                                                                                                                                                                                                                                                                                                                                                                                                                                                                                                                                                                                                                                                                                                                                                                                                                                                                                                                                                                                                                                                                                                                                                                                                                                                                                                                                                                                                                                                                                                                    | <input type="radio"/>               | <input type="radio"/> | <input type="radio"/> | <input type="radio"/> | <input type="radio"/> |           |                    |                       |                       |                       |                       |                       |               |                       |                       |                       |                       |                       |                |                       |                       |                       |                       |                       |                             |                       |                       |                       |                       |                       |              |                       |                       |                       |                       |                       |                                                               |
| Railway noise                                                                                                                                                                                                                                                                                                                                                                                                                                                                                                                                                                                                                                                                                                                                                                                                                                                                                                                                                                                                                                                                                                                                                                                                                                                                                                                                                                                                                                                                                                                         | <input type="radio"/>               | <input type="radio"/> | <input type="radio"/> | <input type="radio"/> | <input type="radio"/> |           |                    |                       |                       |                       |                       |                       |               |                       |                       |                       |                       |                       |                |                       |                       |                       |                       |                       |                             |                       |                       |                       |                       |                       |              |                       |                       |                       |                       |                       |                                                               |
| Aircraft noise                                                                                                                                                                                                                                                                                                                                                                                                                                                                                                                                                                                                                                                                                                                                                                                                                                                                                                                                                                                                                                                                                                                                                                                                                                                                                                                                                                                                                                                                                                                        | <input type="radio"/>               | <input type="radio"/> | <input type="radio"/> | <input type="radio"/> | <input type="radio"/> |           |                    |                       |                       |                       |                       |                       |               |                       |                       |                       |                       |                       |                |                       |                       |                       |                       |                       |                             |                       |                       |                       |                       |                       |              |                       |                       |                       |                       |                       |                                                               |
| Noise from the neighborhood                                                                                                                                                                                                                                                                                                                                                                                                                                                                                                                                                                                                                                                                                                                                                                                                                                                                                                                                                                                                                                                                                                                                                                                                                                                                                                                                                                                                                                                                                                           | <input type="radio"/>               | <input type="radio"/> | <input type="radio"/> | <input type="radio"/> | <input type="radio"/> |           |                    |                       |                       |                       |                       |                       |               |                       |                       |                       |                       |                       |                |                       |                       |                       |                       |                       |                             |                       |                       |                       |                       |                       |              |                       |                       |                       |                       |                       |                                                               |
| Other: .....                                                                                                                                                                                                                                                                                                                                                                                                                                                                                                                                                                                                                                                                                                                                                                                                                                                                                                                                                                                                                                                                                                                                                                                                                                                                                                                                                                                                                                                                                                                          | <input type="radio"/>               | <input type="radio"/> | <input type="radio"/> | <input type="radio"/> | <input type="radio"/> |           |                    |                       |                       |                       |                       |                       |               |                       |                       |                       |                       |                       |                |                       |                       |                       |                       |                       |                             |                       |                       |                       |                       |                       |              |                       |                       |                       |                       |                       |                                                               |
| <p>2.7 Overall, which noise source have you felt most disturbed or annoyed you in your residential area in the last 12 months?</p> <p><input type="radio"/> Road traffic noise <span style="margin-left: 100px;"><input type="radio"/> Noise from industry and commerce</span></p> <p><input type="radio"/> Railway noise <span style="margin-left: 100px;"><input type="radio"/> Noise from neighbors</span></p> <p><input type="radio"/> Aircraft noise <span style="margin-left: 100px;"><input type="radio"/> Noise from bars / sports / recreational events etc.</span></p> <p><input type="radio"/> Other noise, namely: .....</p>                                                                                                                                                                                                                                                                                                                                                                                                                                                                                                                                                                                                                                                                                                                                                                                                                                                                                              | <p>2701</p> <p>2702</p>             |                       |                       |                       |                       |           |                    |                       |                       |                       |                       |                       |               |                       |                       |                       |                       |                       |                |                       |                       |                       |                       |                       |                             |                       |                       |                       |                       |                       |              |                       |                       |                       |                       |                       |                                                               |
| <p>2.8 Next, it's about your sensitivity to noise. How strongly do you agree with the following statement?</p> <p style="text-align: center;"><b>totally agree</b> <span style="margin-left: 150px;"><b>totally disagree</b></span></p> <p><input type="checkbox"/> I am noise sensitive <span style="margin-left: 150px;"><input type="radio"/> <input type="radio"/> <input type="radio"/> <input type="radio"/> <input type="radio"/> <input type="radio"/></span></p>                                                                                                                                                                                                                                                                                                                                                                                                                                                                                                                                                                                                                                                                                                                                                                                                                                                                                                                                                                                                                                                             | <p>2801</p>                         |                       |                       |                       |                       |           |                    |                       |                       |                       |                       |                       |               |                       |                       |                       |                       |                       |                |                       |                       |                       |                       |                       |                             |                       |                       |                       |                       |                       |              |                       |                       |                       |                       |                       |                                                               |
| <p>2.9 Please go through the following 13 statements one by one. Please try to put yourself in the respective situation. Tick the answer that you think best applies to you.</p> <p>→ next page</p>                                                                                                                                                                                                                                                                                                                                                                                                                                                                                                                                                                                                                                                                                                                                                                                                                                                                                                                                                                                                                                                                                                                                                                                                                                                                                                                                   |                                     |                       |                       |                       |                       |           |                    |                       |                       |                       |                       |                       |               |                       |                       |                       |                       |                       |                |                       |                       |                       |                       |                       |                             |                       |                       |                       |                       |                       |              |                       |                       |                       |                       |                       |                                                               |

## Questionnaire for the SiRENE study

|                                                                                                                                                                                                                                                                                                                                                              | strongly<br>agree     | agree                 | disagree              | strongly<br>disagree  |      |
|--------------------------------------------------------------------------------------------------------------------------------------------------------------------------------------------------------------------------------------------------------------------------------------------------------------------------------------------------------------|-----------------------|-----------------------|-----------------------|-----------------------|------|
| ▪ I need an absolutely quiet environment to get a good night's sleep _____                                                                                                                                                                                                                                                                                   | <input type="radio"/> | <input type="radio"/> | <input type="radio"/> | <input type="radio"/> | 2901 |
| ▪ I need quiet surroundings to be able to work on new tasks _____                                                                                                                                                                                                                                                                                            | <input type="radio"/> | <input type="radio"/> | <input type="radio"/> | <input type="radio"/> | 2902 |
| ▪ When I am at home, I habituate to noise quickly _____                                                                                                                                                                                                                                                                                                      | <input type="radio"/> | <input type="radio"/> | <input type="radio"/> | <input type="radio"/> | 2903 |
| ▪ I become very agitated if I hear someone talking while trying to fall asleep _____                                                                                                                                                                                                                                                                         | <input type="radio"/> | <input type="radio"/> | <input type="radio"/> | <input type="radio"/> | 2904 |
| ▪ I am very sensitive to neighborhood noise _____                                                                                                                                                                                                                                                                                                            | <input type="radio"/> | <input type="radio"/> | <input type="radio"/> | <input type="radio"/> | 2905 |
| ▪ When people around me are noisy I don't get on with my work _____                                                                                                                                                                                                                                                                                          | <input type="radio"/> | <input type="radio"/> | <input type="radio"/> | <input type="radio"/> | 2906 |
| ▪ I'm sensitive to noise _____                                                                                                                                                                                                                                                                                                                               | <input type="radio"/> | <input type="radio"/> | <input type="radio"/> | <input type="radio"/> | 2907 |
| ▪ My performance is much worse in noisy places _____                                                                                                                                                                                                                                                                                                         | <input type="radio"/> | <input type="radio"/> | <input type="radio"/> | <input type="radio"/> | 2908 |
| ▪ I do not feel well rested if there has been a lot of noise the night before _____                                                                                                                                                                                                                                                                          | <input type="radio"/> | <input type="radio"/> | <input type="radio"/> | <input type="radio"/> | 2909 |
| ▪ It would not bother me to live in a noisy street _____                                                                                                                                                                                                                                                                                                     | <input type="radio"/> | <input type="radio"/> | <input type="radio"/> | <input type="radio"/> | 2910 |
| ▪ For a quiet place to live I would accept other disadvantages _____                                                                                                                                                                                                                                                                                         | <input type="radio"/> | <input type="radio"/> | <input type="radio"/> | <input type="radio"/> | 2911 |
| ▪ I need peace and quiet to do difficult work _____                                                                                                                                                                                                                                                                                                          | <input type="radio"/> | <input type="radio"/> | <input type="radio"/> | <input type="radio"/> | 2912 |
| ▪ I can fall asleep even when it is noisy _____                                                                                                                                                                                                                                                                                                              | <input type="radio"/> | <input type="radio"/> | <input type="radio"/> | <input type="radio"/> | 2913 |
| 2.10 In the following, it's about your attitude towards the environment and noise. Please answer as spontaneously as possible.<br>What is more important to you?<br><input type="radio"/> A strong business location / an economy that can develop freely<br><input type="radio"/> Quietness and environmental protection / strict environmental regulations |                       |                       |                       |                       | 2100 |

### 3. Time use, sleep and sleep quality

|                                                                                                                                                                                                                                                                                                                                                                                                                                                                                                                                                                      |                              |
|----------------------------------------------------------------------------------------------------------------------------------------------------------------------------------------------------------------------------------------------------------------------------------------------------------------------------------------------------------------------------------------------------------------------------------------------------------------------------------------------------------------------------------------------------------------------|------------------------------|
| 3.1 When do you leave the house (in the morning) on an average weekday (Mon-Fri) at _____ : _____ o'clock<br>And when do you normally return home? at _____ : _____ o'clock                                                                                                                                                                                                                                                                                                                                                                                          | 3101                         |
|                                                                                                                                                                                                                                                                                                                                                                                                                                                                                                                                                                      | 3102                         |
| 3.2 How often in the month do you normally work at night, i.e. between 11 p.m. and 6 a.m.? in the morning?<br><input type="radio"/> Never <input type="radio"/> Number of nights per month: .....                                                                                                                                                                                                                                                                                                                                                                    | 3201                         |
| 3.3 The following questions concern your usual sleeping habits. Your answers should be as accurate as possible and relate to the majority of days and nights <u>during the last four weeks.</u><br><br>After going to bed, at what time do you normally turn off the lights?<br>▪ during the week: (Sun-Thu) at _____ : _____ o'clock<br>▪ on the weekend: (Fri-Sat) at _____ : _____ o'clock<br><br>and when do you usually get up in the morning?<br>▪ during the week: (Mon-Fri) at _____ : _____ o'clock<br>▪ on the weekend: (Sat-Sun) at _____ : _____ o'clock | 3301<br>3302<br>3303<br>3304 |

## Questionnaire for the SiRENE study

|     |                                                                                                                                                                                                                                                                                                                                                                                                                                                                                                                                                                                                                                                                                                                                                                                                                                                                                                                                                                                                                                                                                                                                                                                                                                                                                                                                                                                                                                                                                                                          |                                                              |
|-----|--------------------------------------------------------------------------------------------------------------------------------------------------------------------------------------------------------------------------------------------------------------------------------------------------------------------------------------------------------------------------------------------------------------------------------------------------------------------------------------------------------------------------------------------------------------------------------------------------------------------------------------------------------------------------------------------------------------------------------------------------------------------------------------------------------------------------------------------------------------------------------------------------------------------------------------------------------------------------------------------------------------------------------------------------------------------------------------------------------------------------------------------------------------------------------------------------------------------------------------------------------------------------------------------------------------------------------------------------------------------------------------------------------------------------------------------------------------------------------------------------------------------------|--------------------------------------------------------------|
| 3.4 | How often does it happen to you that you...                                                                                                                                                                                                                                                                                                                                                                                                                                                                                                                                                                                                                                                                                                                                                                                                                                                                                                                                                                                                                                                                                                                                                                                                                                                                                                                                                                                                                                                                              |                                                              |
|     | <div style="text-align: center;"> <b>never</b>      <b>rarely</b>      <b>sometimes</b>      <b>often</b> </div>                                                                                                                                                                                                                                                                                                                                                                                                                                                                                                                                                                                                                                                                                                                                                                                                                                                                                                                                                                                                                                                                                                                                                                                                                                                                                                                                                                                                         |                                                              |
|     | <ul style="list-style-type: none"> <li>▪ ... fall asleep badly _____ <input type="radio"/> _____ <input type="radio"/> _____ <input type="radio"/> _____ <input type="radio"/></li> <li>▪ ... have a restless sleep _____ <input type="radio"/> _____ <input type="radio"/> _____ <input type="radio"/> _____ <input type="radio"/></li> <li>▪ ... wake up several times at night _____ <input type="radio"/> _____ <input type="radio"/> _____ <input type="radio"/> _____ <input type="radio"/></li> <li>▪ ... wake up too early in the morning _____ <input type="radio"/> _____ <input type="radio"/> _____ <input type="radio"/> _____ <input type="radio"/></li> <li>▪ ... do not feel well rested in the morning _____ <input type="radio"/> _____ <input type="radio"/> _____ <input type="radio"/> _____ <input type="radio"/></li> <li>▪ ... are disturbed in your sleep or wake up because of noises in the house (e.g. from your partner, children etc.)? _____ <input type="radio"/> _____ <input type="radio"/> _____ <input type="radio"/> _____ <input type="radio"/></li> </ul>                                                                                                                                                                                                                                                                                                                                                                                                                         | 3401<br>3402<br>3403<br>3404<br>3405<br>3406                 |
| 3.5 | How often have you taken prescription sleep medicines during the <u>last four weeks</u> ?                                                                                                                                                                                                                                                                                                                                                                                                                                                                                                                                                                                                                                                                                                                                                                                                                                                                                                                                                                                                                                                                                                                                                                                                                                                                                                                                                                                                                                |                                                              |
|     | <input type="radio"/> never <input type="radio"/> less than once a week<br><input type="radio"/> once or twice a week <input type="radio"/> three times or more per week                                                                                                                                                                                                                                                                                                                                                                                                                                                                                                                                                                                                                                                                                                                                                                                                                                                                                                                                                                                                                                                                                                                                                                                                                                                                                                                                                 | 3501                                                         |
| 3.6 | In which position did you keep your bedroom window <u>during the last three months</u> at night during the majority of the time?                                                                                                                                                                                                                                                                                                                                                                                                                                                                                                                                                                                                                                                                                                                                                                                                                                                                                                                                                                                                                                                                                                                                                                                                                                                                                                                                                                                         |                                                              |
|     | <input type="radio"/> closed <input type="radio"/> fully open <input type="radio"/> half open                                                                                                                                                                                                                                                                                                                                                                                                                                                                                                                                                                                                                                                                                                                                                                                                                                                                                                                                                                                                                                                                                                                                                                                                                                                                                                                                                                                                                            | 3601                                                         |
|     | If the window was open or half-open, why? <input type="radio"/> fresh air <input type="radio"/> cooling <input type="radio"/> other                                                                                                                                                                                                                                                                                                                                                                                                                                                                                                                                                                                                                                                                                                                                                                                                                                                                                                                                                                                                                                                                                                                                                                                                                                                                                                                                                                                      | 3602                                                         |
|     | If the window was closed, why? <input type="radio"/> noise <input type="radio"/> heat loss <input type="radio"/> other                                                                                                                                                                                                                                                                                                                                                                                                                                                                                                                                                                                                                                                                                                                                                                                                                                                                                                                                                                                                                                                                                                                                                                                                                                                                                                                                                                                                   | 3603                                                         |
| 3.7 | How often do you take the following measures against noise disturbances (i.e. road, railway or aircraft noise) for sleeping?                                                                                                                                                                                                                                                                                                                                                                                                                                                                                                                                                                                                                                                                                                                                                                                                                                                                                                                                                                                                                                                                                                                                                                                                                                                                                                                                                                                             |                                                              |
|     | <div style="text-align: center;"> <b>never</b>      <b>rarely</b>      <b>occasionally</b>      <b>often</b>      <b>very often</b>      <b>always</b> </div>                                                                                                                                                                                                                                                                                                                                                                                                                                                                                                                                                                                                                                                                                                                                                                                                                                                                                                                                                                                                                                                                                                                                                                                                                                                                                                                                                            |                                                              |
|     | <ul style="list-style-type: none"> <li>▪ Using earplugs/Oropax _____ <input type="radio"/> _____ <input type="radio"/> _____ <input type="radio"/> _____ <input type="radio"/> _____ <input type="radio"/></li> <li>▪ Closing bedroom windows _____ <input type="radio"/> _____ <input type="radio"/> _____ <input type="radio"/> _____ <input type="radio"/> _____ <input type="radio"/></li> <li>▪ Change sleeping times _____ <input type="radio"/> _____ <input type="radio"/> _____ <input type="radio"/> _____ <input type="radio"/> _____ <input type="radio"/></li> <li>▪ Sleep elsewhere / change rooms _____ <input type="radio"/> _____ <input type="radio"/> _____ <input type="radio"/> _____ <input type="radio"/> _____ <input type="radio"/></li> <li>▪ Taking sleeping pills / sedatives _____ <input type="radio"/> _____ <input type="radio"/> _____ <input type="radio"/> _____ <input type="radio"/> _____ <input type="radio"/></li> <li>▪ Alcohol intake _____ <input type="radio"/> _____ <input type="radio"/> _____ <input type="radio"/> _____ <input type="radio"/> _____ <input type="radio"/></li> <li>▪ Eat or nibble something _____ <input type="radio"/> _____ <input type="radio"/> _____ <input type="radio"/> _____ <input type="radio"/> _____ <input type="radio"/></li> <li>▪ Reading, TV, listening to music, smartphone _____ <input type="radio"/> _____ <input type="radio"/> _____ <input type="radio"/> _____ <input type="radio"/> _____ <input type="radio"/></li> </ul> | 3701<br>3702<br>3703<br>3704<br>3705<br>3706<br>3707<br>3708 |

## 4. Behavior and personality

|     |                                                                                                                                                                                                                                                                                                                                                                                                                                                                                                                                                                                                                                                                                                                                                                                                                                                                                                                                                                                                                                                                                                                                                                                      |                                                                              |
|-----|--------------------------------------------------------------------------------------------------------------------------------------------------------------------------------------------------------------------------------------------------------------------------------------------------------------------------------------------------------------------------------------------------------------------------------------------------------------------------------------------------------------------------------------------------------------------------------------------------------------------------------------------------------------------------------------------------------------------------------------------------------------------------------------------------------------------------------------------------------------------------------------------------------------------------------------------------------------------------------------------------------------------------------------------------------------------------------------------------------------------------------------------------------------------------------------|------------------------------------------------------------------------------|
| 4.1 | Below you find a number of statements. Please read each statement carefully and indicate how much the statement generally applies to you, i.e. how much your usual thinking and acting is described by these statements.<br>(please circle the appropriate number)                                                                                                                                                                                                                                                                                                                                                                                                                                                                                                                                                                                                                                                                                                                                                                                                                                                                                                                   |                                                                              |
|     | <div style="text-align: center;"> <b>disagree</b>                                      <b>fully agree</b> </div>                                                                                                                                                                                                                                                                                                                                                                                                                                                                                                                                                                                                                                                                                                                                                                                                                                                                                                                                                                                                                                                                     |                                                                              |
|     | <ul style="list-style-type: none"> <li>▪ When I have plans, I follow them _____ 1 _____ 2 _____ 3 _____ 4 _____ 5 _____ 6 _____ 7</li> <li>▪ Normally, I can do anything _____ 1 _____ 2 _____ 3 _____ 4 _____ 5 _____ 6 _____ 7</li> <li>▪ It's important for me to stay interested in many things _____ 1 _____ 2 _____ 3 _____ 4 _____ 5 _____ 6 _____ 7</li> <li>▪ I can do several things at once _____ 1 _____ 2 _____ 3 _____ 4 _____ 5 _____ 6 _____ 7</li> <li>▪ I'm determined _____ 1 _____ 2 _____ 3 _____ 4 _____ 5 _____ 6 _____ 7</li> <li>▪ I keep an interest in a lot of things _____ 1 _____ 2 _____ 3 _____ 4 _____ 5 _____ 6 _____ 7</li> <li>▪ I often find something to laugh about _____ 1 _____ 2 _____ 3 _____ 4 _____ 5 _____ 6 _____ 7</li> <li>▪ Normally, I can well handle a situation from multiple perspectives _____ 1 _____ 2 _____ 3 _____ 4 _____ 5 _____ 6 _____ 7</li> <li>▪ I can overcome myself to do things that I don't really want to do. _____ 1 _____ 2 _____ 3 _____ 4 _____ 5 _____ 6 _____ 7</li> <li>▪ I've got enough energy to do anything what I have to do _____ 1 _____ 2 _____ 3 _____ 4 _____ 5 _____ 6 _____ 7</li> </ul> | 4101<br>4102<br>4103<br>4104<br>4105<br>4106<br>4107<br>4108<br>4109<br>4110 |

## Questionnaire for the SiRENE study

|     |                                                                                                                                                                                                                                                                                                                                                                                                                                                                                                                                                                                                                                                                                                                                                                                                                                                                                                                                                                                                                                                                                                                                                                                                                                                                                                                                                                                                                                                                                                                                                                                                                                                                                                                                                                                                                                                                                                                                                                                                                                                                                                                                                                                                                                                                                                                                                                                                                                                                                                                                                                                                                                                                                                                                                                                                                                                                                                                                                                                                                                                                                                                                                                                                                                                                                                                                                                                                                                                                                                                                                                                                                                                                                                                                                                                                                                                                                                                                                                                                                                                                                                                                                                                                                                                                                                                                                                                                       |                                                                                                                                                                                                                                                                                                                                                                                             |
|-----|-------------------------------------------------------------------------------------------------------------------------------------------------------------------------------------------------------------------------------------------------------------------------------------------------------------------------------------------------------------------------------------------------------------------------------------------------------------------------------------------------------------------------------------------------------------------------------------------------------------------------------------------------------------------------------------------------------------------------------------------------------------------------------------------------------------------------------------------------------------------------------------------------------------------------------------------------------------------------------------------------------------------------------------------------------------------------------------------------------------------------------------------------------------------------------------------------------------------------------------------------------------------------------------------------------------------------------------------------------------------------------------------------------------------------------------------------------------------------------------------------------------------------------------------------------------------------------------------------------------------------------------------------------------------------------------------------------------------------------------------------------------------------------------------------------------------------------------------------------------------------------------------------------------------------------------------------------------------------------------------------------------------------------------------------------------------------------------------------------------------------------------------------------------------------------------------------------------------------------------------------------------------------------------------------------------------------------------------------------------------------------------------------------------------------------------------------------------------------------------------------------------------------------------------------------------------------------------------------------------------------------------------------------------------------------------------------------------------------------------------------------------------------------------------------------------------------------------------------------------------------------------------------------------------------------------------------------------------------------------------------------------------------------------------------------------------------------------------------------------------------------------------------------------------------------------------------------------------------------------------------------------------------------------------------------------------------------------------------------------------------------------------------------------------------------------------------------------------------------------------------------------------------------------------------------------------------------------------------------------------------------------------------------------------------------------------------------------------------------------------------------------------------------------------------------------------------------------------------------------------------------------------------------------------------------------------------------------------------------------------------------------------------------------------------------------------------------------------------------------------------------------------------------------------------------------------------------------------------------------------------------------------------------------------------------------------------------------------------------------------------------------------------------|---------------------------------------------------------------------------------------------------------------------------------------------------------------------------------------------------------------------------------------------------------------------------------------------------------------------------------------------------------------------------------------------|
| 4.2 | <p>How would you rate your ability to cope with stress on a scale of 1 to 6?<br/>(1 = I can shake off stress very well, 6 = stress gnaws at me)</p> <div style="display: flex; justify-content: space-around; margin-top: 10px;"> <span>1<br/><input type="radio"/></span> <span>2<br/><input type="radio"/></span> <span>3<br/><input type="radio"/></span> <span>4<br/><input type="radio"/></span> <span>5<br/><input type="radio"/></span> <span>6<br/><input type="radio"/></span> </div>                                                                                                                                                                                                                                                                                                                                                                                                                                                                                                                                                                                                                                                                                                                                                                                                                                                                                                                                                                                                                                                                                                                                                                                                                                                                                                                                                                                                                                                                                                                                                                                                                                                                                                                                                                                                                                                                                                                                                                                                                                                                                                                                                                                                                                                                                                                                                                                                                                                                                                                                                                                                                                                                                                                                                                                                                                                                                                                                                                                                                                                                                                                                                                                                                                                                                                                                                                                                                                                                                                                                                                                                                                                                                                                                                                                                                                                                                                        | 4201                                                                                                                                                                                                                                                                                                                                                                                        |
|     | <p>And how high would you rate the level of stress in your life over <u>the past year</u>? (at home and at work)? (1 = no stress, 6 = extreme stress)</p> <div style="display: flex; justify-content: space-around; margin-top: 10px;"> <span>1<br/><input type="radio"/></span> <span>2<br/><input type="radio"/></span> <span>3<br/><input type="radio"/></span> <span>4<br/><input type="radio"/></span> <span>5<br/><input type="radio"/></span> <span>6<br/><input type="radio"/></span> </div>                                                                                                                                                                                                                                                                                                                                                                                                                                                                                                                                                                                                                                                                                                                                                                                                                                                                                                                                                                                                                                                                                                                                                                                                                                                                                                                                                                                                                                                                                                                                                                                                                                                                                                                                                                                                                                                                                                                                                                                                                                                                                                                                                                                                                                                                                                                                                                                                                                                                                                                                                                                                                                                                                                                                                                                                                                                                                                                                                                                                                                                                                                                                                                                                                                                                                                                                                                                                                                                                                                                                                                                                                                                                                                                                                                                                                                                                                                  | 4202                                                                                                                                                                                                                                                                                                                                                                                        |
| 4.  | <p>Please, rate how much each statement resembles your thoughts and actions in past <u>demanding or difficult situations</u>. Please, endorse each item.</p> <div style="display: flex; justify-content: space-between; margin-top: 10px;"> <div></div> <div> <b>not at<br/>all</b> </div> <div> <b>a little<br/>bit</b> </div> <div> <b>consi-<br/>derably</b> </div> <div> <b>very<br/>much</b> </div> </div> <ul style="list-style-type: none"> <li>▪ I've been turning to work or other activities to take my mind off things <span style="float: right;"><input type="radio"/> <input type="radio"/> <input type="radio"/> <input type="radio"/></span></li> <li>▪ I've been concentrating my efforts on doing something about the situation I'm in <span style="float: right;"><input type="radio"/> <input type="radio"/> <input type="radio"/> <input type="radio"/></span></li> <li>▪ I've been saying to myself "this isn't real" <span style="float: right;"><input type="radio"/> <input type="radio"/> <input type="radio"/> <input type="radio"/></span></li> <li>▪ I've been getting emotional support from others <span style="float: right;"><input type="radio"/> <input type="radio"/> <input type="radio"/> <input type="radio"/></span></li> <li>▪ I've been giving up trying to deal with it <span style="float: right;"><input type="radio"/> <input type="radio"/> <input type="radio"/> <input type="radio"/></span></li> <li>▪ I've been taking action to try to make the situation better <span style="float: right;"><input type="radio"/> <input type="radio"/> <input type="radio"/> <input type="radio"/></span></li> <li>▪ I've been refusing to believe that it has happened <span style="float: right;"><input type="radio"/> <input type="radio"/> <input type="radio"/> <input type="radio"/></span></li> <li>▪ I've been saying things to let my unpleasant feelings escape <span style="float: right;"><input type="radio"/> <input type="radio"/> <input type="radio"/> <input type="radio"/></span></li> <li>▪ I've been getting help and advice from other people <span style="float: right;"><input type="radio"/> <input type="radio"/> <input type="radio"/> <input type="radio"/></span></li> <li>▪ I've been looking for something good in what is happening <span style="float: right;"><input type="radio"/> <input type="radio"/> <input type="radio"/> <input type="radio"/></span></li> <li>▪ I've been trying to come up with a strategy about what to do <span style="float: right;"><input type="radio"/> <input type="radio"/> <input type="radio"/> <input type="radio"/></span></li> <li>▪ I've been getting comfort and understanding from someone <span style="float: right;"><input type="radio"/> <input type="radio"/> <input type="radio"/> <input type="radio"/></span></li> <li>▪ I didn't even try to handle the situation anymore <span style="float: right;"><input type="radio"/> <input type="radio"/> <input type="radio"/> <input type="radio"/></span></li> <li>▪ I've been trying to find something good in this, what happened to me <span style="float: right;"><input type="radio"/> <input type="radio"/> <input type="radio"/> <input type="radio"/></span></li> <li>▪ I did something to distract myself <span style="float: right;"><input type="radio"/> <input type="radio"/> <input type="radio"/> <input type="radio"/></span></li> <li>▪ I've been accepting the reality of the fact that it has happened <span style="float: right;"><input type="radio"/> <input type="radio"/> <input type="radio"/> <input type="radio"/></span></li> <li>▪ I've been expressing my negative feelings <span style="float: right;"><input type="radio"/> <input type="radio"/> <input type="radio"/> <input type="radio"/></span></li> <li>▪ I've been trying to get advice or help from other people about what to do <span style="float: right;"><input type="radio"/> <input type="radio"/> <input type="radio"/> <input type="radio"/></span></li> <li>▪ I've been learning to live with it <span style="float: right;"><input type="radio"/> <input type="radio"/> <input type="radio"/> <input type="radio"/></span></li> <li>▪ I've been thinking hard about what steps to take <span style="float: right;"><input type="radio"/> <input type="radio"/> <input type="radio"/> <input type="radio"/></span></li> </ul> | <div style="display: flex; flex-direction: column;"> <div>4301</div> <div>4302</div> <div>4303</div> <div>4304</div> <div>4305</div> <div>4306</div> <div>4307</div> <div>4308</div> <div>4309</div> <div>4310</div> <div>4311</div> <div>4312</div> <div>4313</div> <div>4314</div> <div>4315</div> <div>4316</div> <div>4317</div> <div>4318</div> <div>4319</div> <div>4320</div> </div> |
| 4.4 | <p>The following statements may apply more or less to you. Please indicate the extent to which each statement applies to you personally.</p> <div style="display: flex; justify-content: space-between; margin-top: 10px;"> <div></div> <div> <b>totally<br/>disagree</b> </div> <div> <b>fully<br/>agree</b> </div> </div> <ul style="list-style-type: none"> <li>▪ I have my life in my own hands <span style="float: right;"><input type="radio"/> <input type="radio"/> <input type="radio"/> <input type="radio"/></span></li> <li>▪ If I make an effort, I will succeed <span style="float: right;"><input type="radio"/> <input type="radio"/> <input type="radio"/> <input type="radio"/></span></li> <li>▪ Whether privately or at work: My life is largely determined by others <span style="float: right;"><input type="radio"/> <input type="radio"/> <input type="radio"/> <input type="radio"/></span></li> <li>▪ My plans are often overshadowed by fate <span style="float: right;"><input type="radio"/> <input type="radio"/> <input type="radio"/> <input type="radio"/></span></li> </ul>                                                                                                                                                                                                                                                                                                                                                                                                                                                                                                                                                                                                                                                                                                                                                                                                                                                                                                                                                                                                                                                                                                                                                                                                                                                                                                                                                                                                                                                                                                                                                                                                                                                                                                                                                                                                                                                                                                                                                                                                                                                                                                                                                                                                                                                                                                                                                                                                                                                                                                                                                                                                                                                                                                                                                                                                                                                                                                                                                                                                                                                                                                                                                                                                                                                                                         | <div style="display: flex; flex-direction: column;"> <div>4401</div> <div>4402</div> <div>4403</div> <div>4404</div> </div>                                                                                                                                                                                                                                                                 |

## Questionnaire for the SiRENE study

### 5. Health and health behavior

|     |                                                                                                                                                                                                                                                                                                                                                                                                                                                                                                                                                                                                                                                                                                                                                                                                                                                                                                                                                                                                                                                                                                                                                                                                                                                                                                                   |                                                    |                                        |
|-----|-------------------------------------------------------------------------------------------------------------------------------------------------------------------------------------------------------------------------------------------------------------------------------------------------------------------------------------------------------------------------------------------------------------------------------------------------------------------------------------------------------------------------------------------------------------------------------------------------------------------------------------------------------------------------------------------------------------------------------------------------------------------------------------------------------------------------------------------------------------------------------------------------------------------------------------------------------------------------------------------------------------------------------------------------------------------------------------------------------------------------------------------------------------------------------------------------------------------------------------------------------------------------------------------------------------------|----------------------------------------------------|----------------------------------------|
| 5.1 | How tall are you? ..... cm.                                                                                                                                                                                                                                                                                                                                                                                                                                                                                                                                                                                                                                                                                                                                                                                                                                                                                                                                                                                                                                                                                                                                                                                                                                                                                       | What is your weight? .....kg.                      | 5101/2                                 |
| 5.2 | How good is your health in general?<br><input type="radio"/> very good <input type="radio"/> good <input type="radio"/> fair <input type="radio"/> bad <input type="radio"/> very bad                                                                                                                                                                                                                                                                                                                                                                                                                                                                                                                                                                                                                                                                                                                                                                                                                                                                                                                                                                                                                                                                                                                             |                                                    | 5201                                   |
|     | Have you ever been diagnosed with diabetes by a doctor?                                                                                                                                                                                                                                                                                                                                                                                                                                                                                                                                                                                                                                                                                                                                                                                                                                                                                                                                                                                                                                                                                                                                                                                                                                                           | <input type="radio"/> yes <input type="radio"/> no | 5202                                   |
|     | Have you ever been diagnosed with hypertension by a doctor?                                                                                                                                                                                                                                                                                                                                                                                                                                                                                                                                                                                                                                                                                                                                                                                                                                                                                                                                                                                                                                                                                                                                                                                                                                                       | <input type="radio"/> yes <input type="radio"/> no | 5203                                   |
|     | Do you have hearing problems? <input type="radio"/> yes ( <input type="radio"/> I use a hearing aid) <input type="radio"/> no                                                                                                                                                                                                                                                                                                                                                                                                                                                                                                                                                                                                                                                                                                                                                                                                                                                                                                                                                                                                                                                                                                                                                                                     |                                                    | 5204                                   |
| 5.3 | <p>The following questions are about how you feel and how things have been with you <u>during the past 4 weeks</u>. For each question, please give the one answer that comes closest to the way you have been feeling.</p> <p>How much of the time during the past 4 weeks...</p> <p style="text-align: center;"> <input type="radio"/> none of the time   <input type="radio"/> quite sometimes   <input type="radio"/> all of the time </p> <ul style="list-style-type: none"> <li>▪ have you been a very nervous person? <input type="radio"/> <input type="radio"/> <input type="radio"/> <input type="radio"/> <input type="radio"/></li> <li>▪ have you felt so down in the dumps that nothing could cheer you up? <input type="radio"/> <input type="radio"/> <input type="radio"/> <input type="radio"/> <input type="radio"/></li> <li>▪ have you felt calm and peaceful? <input type="radio"/> <input type="radio"/> <input type="radio"/> <input type="radio"/> <input type="radio"/></li> <li>▪ downhearted and blue? <input type="radio"/> <input type="radio"/> <input type="radio"/> <input type="radio"/> <input type="radio"/></li> <li>▪ have you been a happy person? <input type="radio"/> <input type="radio"/> <input type="radio"/> <input type="radio"/> <input type="radio"/></li> </ul> |                                                    | 5301<br>5302<br>5303<br>5304<br>5305   |
| 5.4 | <p>The following block of questions deals with aspects of your health behavior and physical activity.</p> <p>Do you currently (i.e. last month) smoke cigarettes?</p> <p><input type="radio"/> yes   (I smoke on average ..... cigarettes per day)</p> <p><input type="radio"/> no   (<input type="radio"/> I used to smoke, but haven't smoked for ..... years)</p> <p><input type="radio"/> I never smoked.</p> <p>How many hours and minutes <u>in the last week</u> did you sweat in your free time due to physical activity (e.g. running, cycling, etc.)?</p> <p>___ hours and ___ minutes in <b>the last week</b></p> <p>How long have you been physically active <u>in the last week</u> so that you have at least lost your breath (e.g. by running, hiking, dancing, gardening or various sports)?</p> <p>___ hours and ___ minutes in <b>the last week</b></p>                                                                                                                                                                                                                                                                                                                                                                                                                                         |                                                    | 5401/2<br>5403<br><br>5404<br><br>5405 |

### 6. Employment situation and occupation

|     |                                                                                                                                                                                                                                                                                                                                                                                                                                                                                                                                                                     |  |                          |
|-----|---------------------------------------------------------------------------------------------------------------------------------------------------------------------------------------------------------------------------------------------------------------------------------------------------------------------------------------------------------------------------------------------------------------------------------------------------------------------------------------------------------------------------------------------------------------------|--|--------------------------|
| 6.1 | <p>In the following we would like to have some information about your employment situation.</p> <p> <input type="radio"/> yes, full time   <input type="radio"/> yes, part-time .....%   <input type="radio"/> in training<br/> <input type="radio"/> not employed, but looking for a job   <input type="radio"/> retired<br/> <input type="radio"/> not employed and not looking for a job (e.g. housewife/houseman)   <input type="radio"/> other </p> <p>If you are employed, what is your current occupation? (<i>as accurate as possible</i>)</p> <p>.....</p> |  | 6101<br>6102<br><br>6103 |
| 6.2 | <p>What profession did your father and mother practice when you were a child?</p> <p>Father's profession: ..... Mother's profession: .....</p>                                                                                                                                                                                                                                                                                                                                                                                                                      |  | 6201<br>6202             |

## Questionnaire for the SiRENE study

|                                                                                                                                                                                                                                                                                                                                                                                                                                                                                                                                                                                                                                                                                                                                                                                                                                                                                                                                                                                                                                                                                                                                                                    |      |
|--------------------------------------------------------------------------------------------------------------------------------------------------------------------------------------------------------------------------------------------------------------------------------------------------------------------------------------------------------------------------------------------------------------------------------------------------------------------------------------------------------------------------------------------------------------------------------------------------------------------------------------------------------------------------------------------------------------------------------------------------------------------------------------------------------------------------------------------------------------------------------------------------------------------------------------------------------------------------------------------------------------------------------------------------------------------------------------------------------------------------------------------------------------------|------|
| <p>6.3 What is your highest education?</p> <ul style="list-style-type: none"> <li><input type="radio"/> Primary school</li> <li><input type="radio"/> Compulsory school (9 years)</li> <li><input type="radio"/> Transition trainings: Pre-apprenticeship, 10<sup>th</sup> school year, vocational choice school</li> <li><input type="radio"/> Technical secondary school (DMS, FMS)</li> <li><input type="radio"/> Apprenticeship with certificate of proficiency/apprenticeship</li> <li><input type="radio"/> Professional or technical baccalaureate</li> <li><input type="radio"/> High school diploma, A level ("Matura", "Abitur" in German)</li> <li><input type="radio"/> Higher vocational education with professional certificate, master's diploma</li> <li><input type="radio"/> Higher technical college (HF), technical school</li> <li><input type="radio"/> Engineering School HTL, Higher Vocational School (HWV, HFG, HFS)</li> <li><input type="radio"/> Bachelor (University, ETH, FH, PH)</li> <li><input type="radio"/> Master, licentiate, diploma (University, ETH, FH, PH)</li> <li><input type="radio"/> Doctorate, PhD, MD</li> </ul> | 6301 |
|--------------------------------------------------------------------------------------------------------------------------------------------------------------------------------------------------------------------------------------------------------------------------------------------------------------------------------------------------------------------------------------------------------------------------------------------------------------------------------------------------------------------------------------------------------------------------------------------------------------------------------------------------------------------------------------------------------------------------------------------------------------------------------------------------------------------------------------------------------------------------------------------------------------------------------------------------------------------------------------------------------------------------------------------------------------------------------------------------------------------------------------------------------------------|------|

Thank you very much. The interview is almost over. Please answer the following questions:

|                                                                                                                                                                                                                                                                                                                                            |    |
|--------------------------------------------------------------------------------------------------------------------------------------------------------------------------------------------------------------------------------------------------------------------------------------------------------------------------------------------|----|
| <p> Would you like to take part in the prize draw for three Apple iPad mini Retina?</p> <p><input type="radio"/> yes <input type="radio"/> no</p>                                                                                                         | P1 |
| <p>Would you be interested in participating in any of the following scientific studies as a (paid) volunteer?</p> <p><input type="radio"/> yes, sleep laboratory experiment at the Centre for Chronobiology at the University of Basel</p> <p><input type="radio"/> yes, noise measurements at my home</p> <p><input type="radio"/> no</p> | P2 |
| <p>May we ask you again in the future to take part in another survey?</p> <p><input type="radio"/> yes <input type="radio"/> no</p>                                                                                                                                                                                                        | P3 |
| <p>If you answered "yes" to one or more of the above questions, please provide us with your name, postal address, e-mail address or telephone number so that we can contact you:</p> <p>.....</p> <p>.....</p> <p>.....</p>                                                                                                                | P4 |
| <p>.....</p> <p>.....</p> <p>.....</p>                                                                                                                                                                                                                                                                                                     | P5 |

😊 Thank you very much for your cooperation! 😊

## Questionnaire for the SiRENE study

Return address:

Federal Office for the Environment  
Noise and NIR division  
SiRENE Study / BMK  
3003 Berne

Fax:

email:

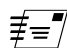

Please use the prepaid reply envelope.

Remarks and comments here:
